# Supplementary material for: Identifying environmental risk factors for inflammatory bowel diseases: a Mendelian randomization study
Source: PubMed Central journal article supplement (PMC7648100; doi:10.1038/s41598-020-76361-2), 2020-11-06
Supplement: 41598_2020_76361_MOESM1_ESM.pdf [file 41598_2020_76361_MOESM1_ESM.pdf]

Original article:

## **Identifying environmental risk factors for inflammatory bowel diseases: A Mendelian randomization study.**

Robert Carreras-Torres<sup>1,2,3,\*</sup>, Gemma Ibáñez-Sanz<sup>2,3</sup>, Mireia Obón-Santacana<sup>1,2,3</sup>, Eric J. Duell<sup>1,2</sup>, Victor Moreno<sup>1,2,3,4</sup>.

<sup>1</sup>*Colorectal Cancer Group, ONCOBELL Program, Bellvitge Biomedical Research Institute (IDIBELL). Hospitalet de Llobregat, Barcelona, Spain.*

<sup>2</sup>*Unit of Biomarkers and Susceptibility, Oncology Data Analytics Program, Catalan Institute of Oncology (ICO). Hospitalet de Llobregat, Barcelona, Spain.*

<sup>3</sup>*Consortium for Biomedical Research in Epidemiology and Public Health (CIBERESP), Spain.*

<sup>4</sup>*Department of Clinical Sciences, Faculty of Medicine, University of Barcelona, Barcelona, Spain.*

**Running Head:** Causality appraisal of risk factors for IBD risk

**Keywords:** IBD, Crohn's disease; ulcerative colitis, risk factors, two-sample Mendelian randomization

**\*Corresponding author:**

Robert Carreras-Torres,  
Bellvitge Biomedical Research Institute,  
Avinguda de la Granvia de l'Hospitalet, 199, 08908, L'Hospitalet de Llobregat, Barcelona,  
Spain.

Tel.: +34 932 603 786;

email: rcarrerastorres@gmail.com

**Figure S1** – Scatter plots of summary statistics for genetic association on potential risk exposures and inflammatory bowel diseases.

**Lifestyle exposure**

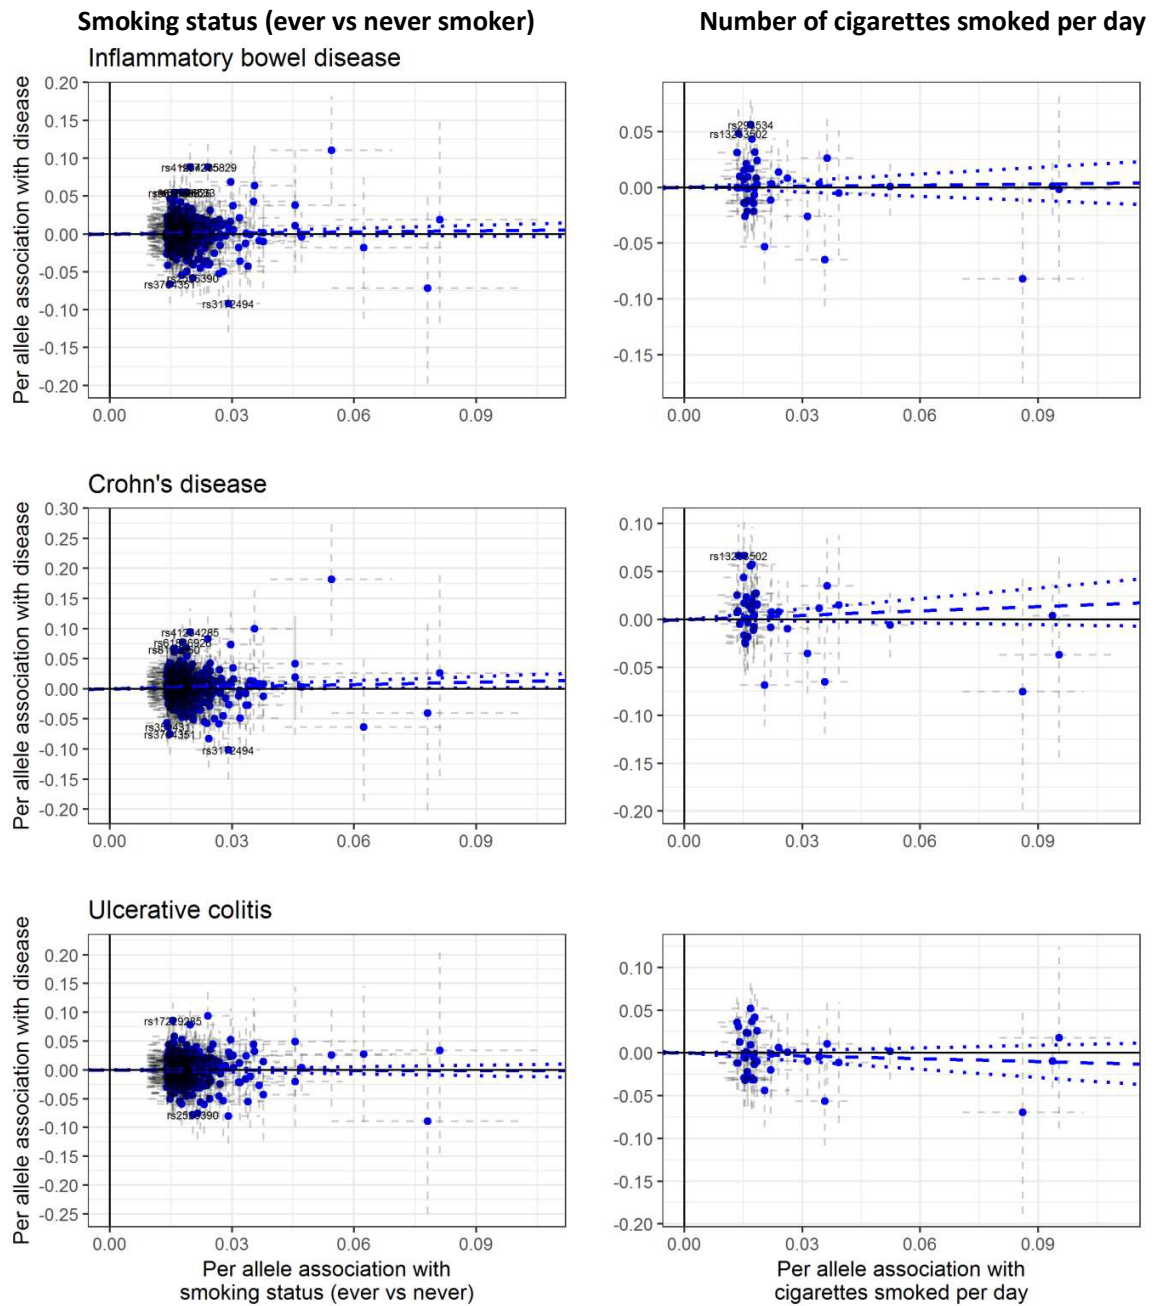



## Body fat percentage

## Physical activity

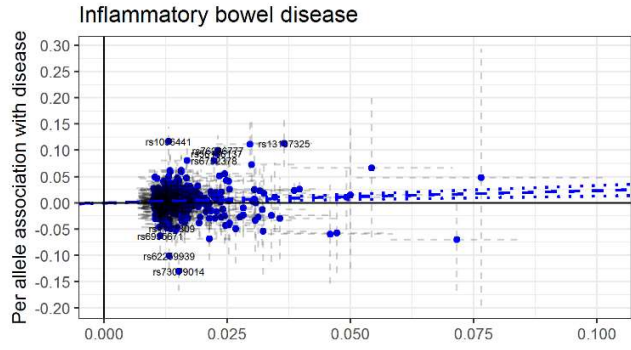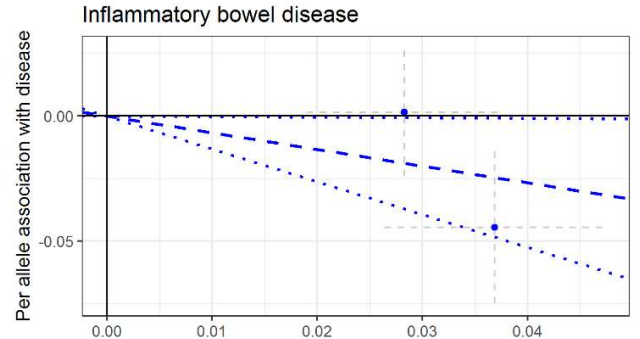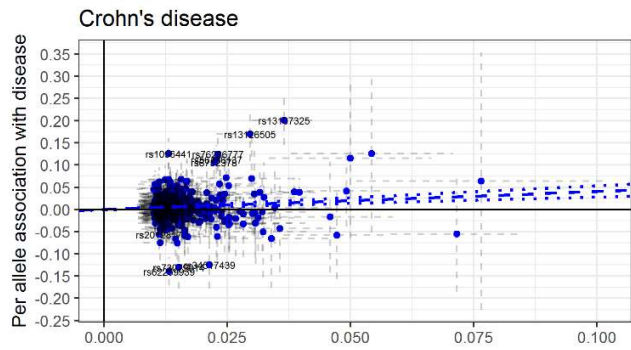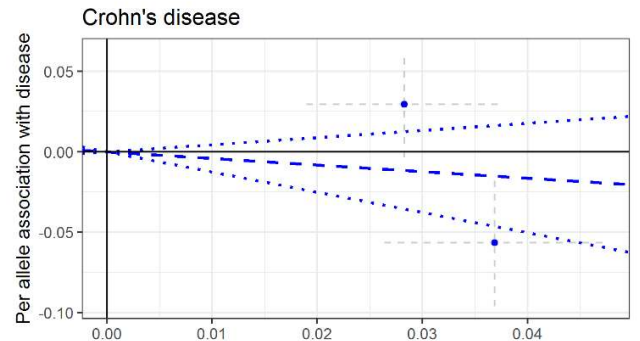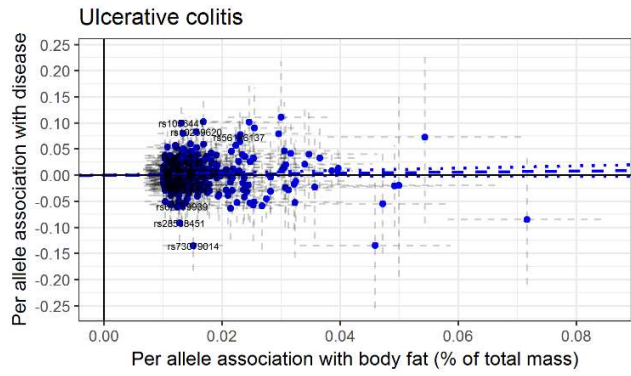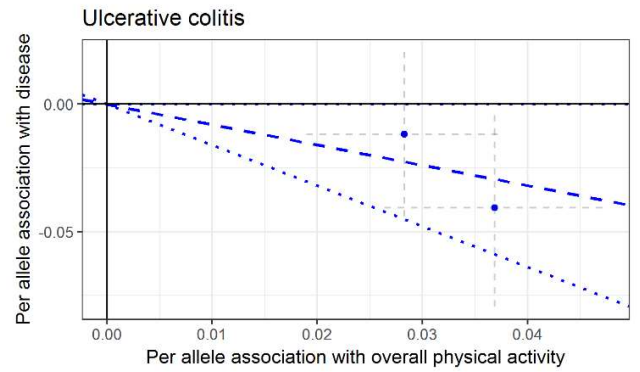

## Nutrient exposures

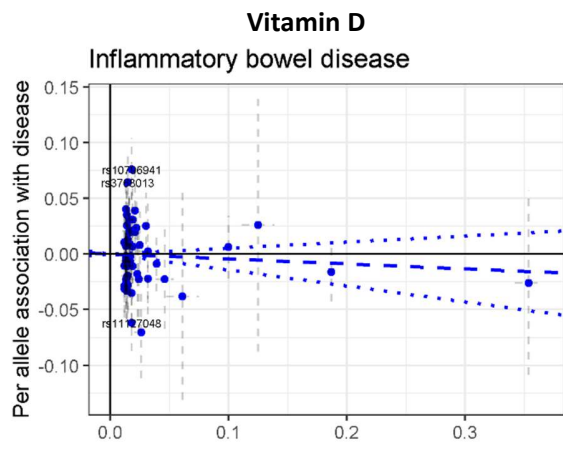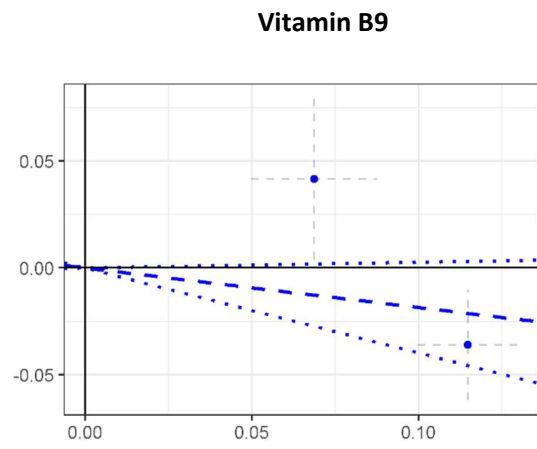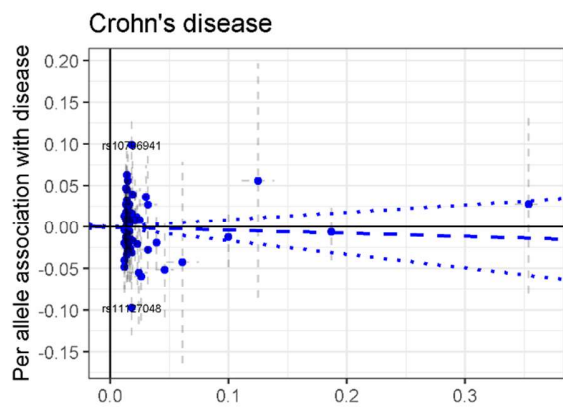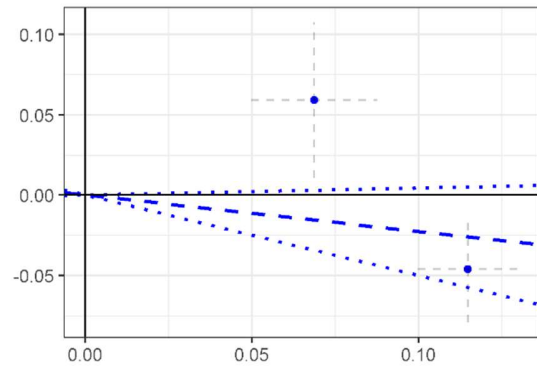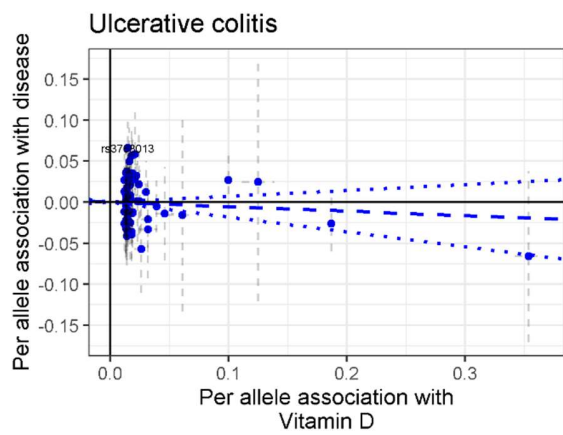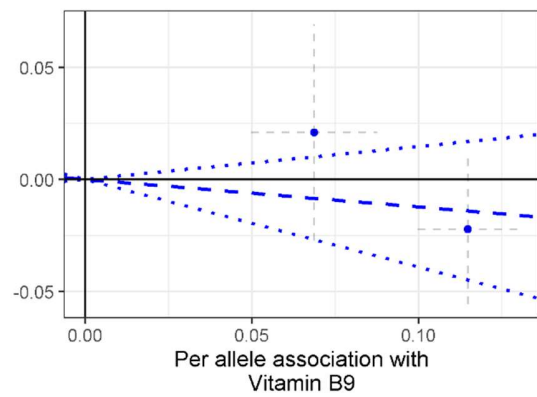

### Vitamin B12

#### Inflammatory bowel disease

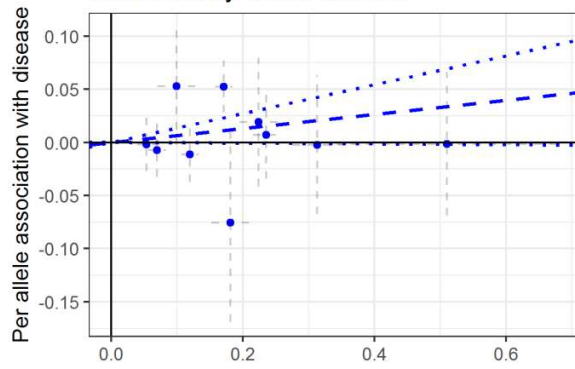

#### Crohn's disease

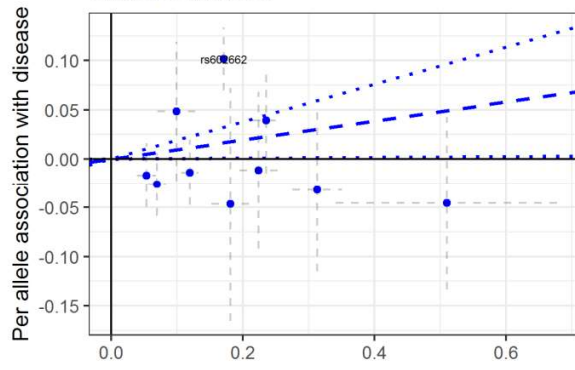

#### Ulcerative colitis

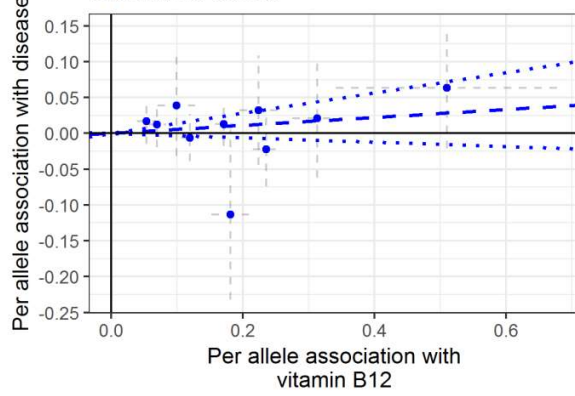

### Omega-3 fatty acids

#### Inflammatory bowel disease

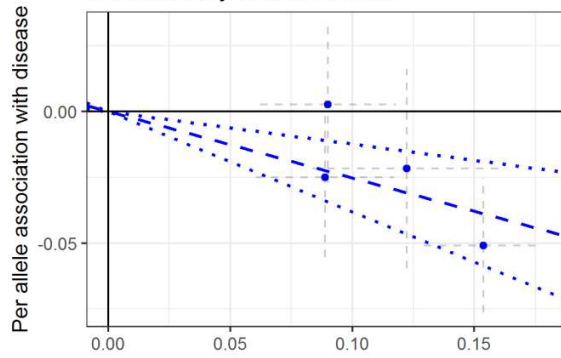

### Omega-6 fatty acids

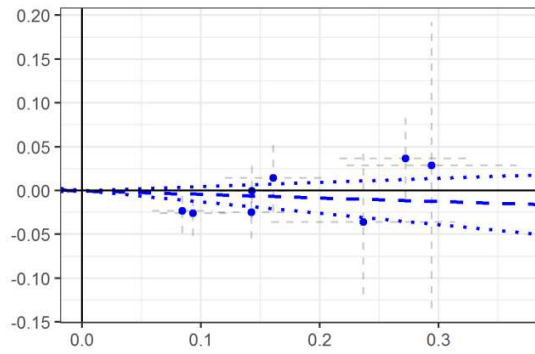

#### Crohn's disease

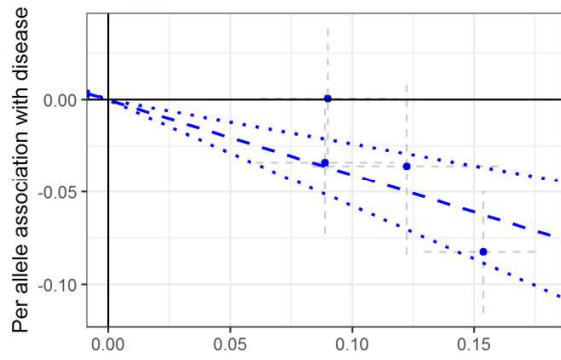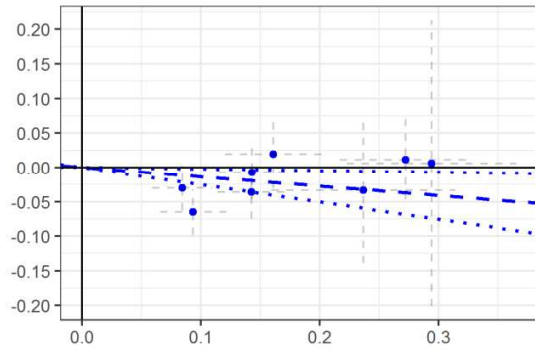

#### Ulcerative colitis

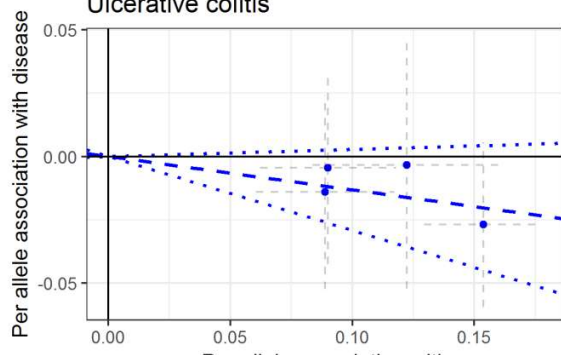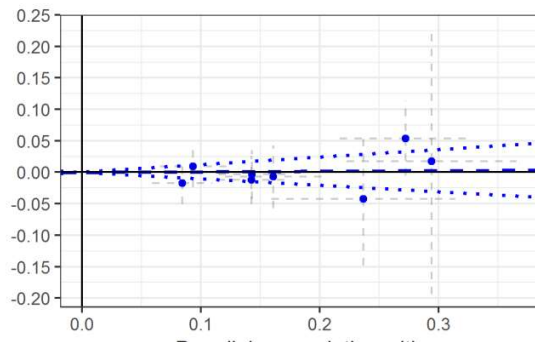

### Monounsaturated fatty acids

#### Inflammatory bowel disease

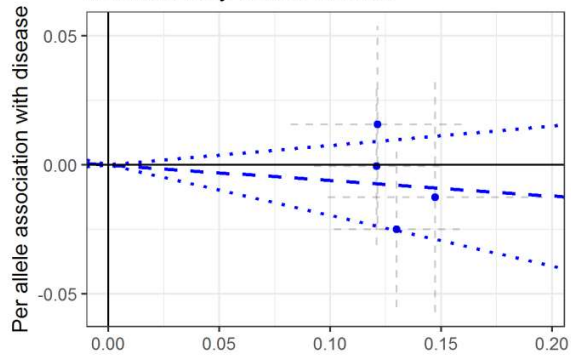

### Total fatty acids

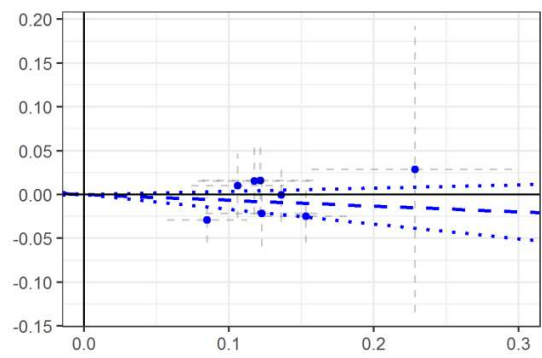

#### Crohn's disease

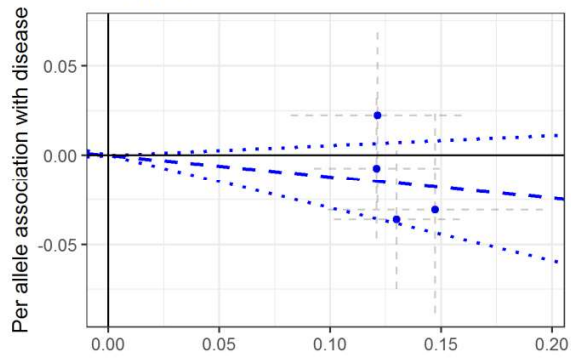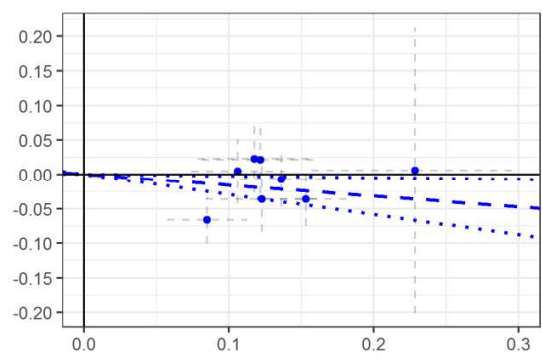

#### Ulcerative colitis

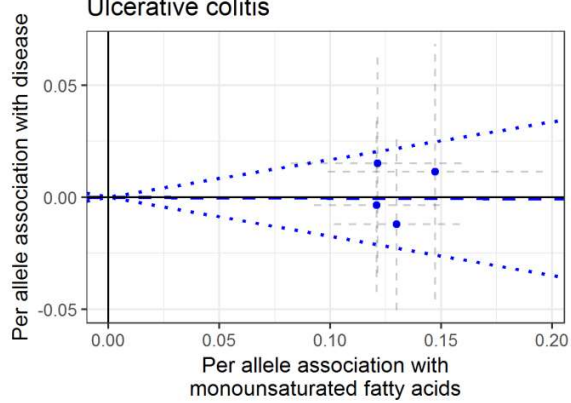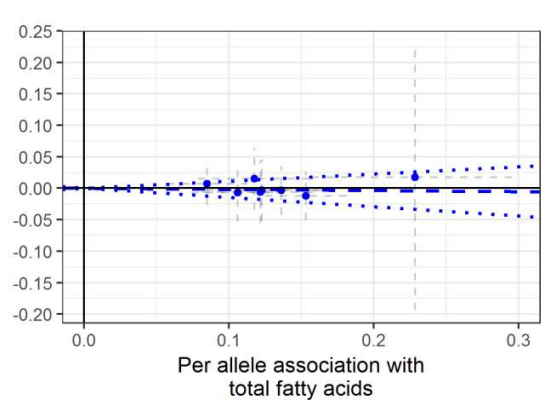



Table S1- Association summary statistics of genetic instruments for observed environmental risk factors and inflammatory bowel diseases (IBD), including Crohn's disease (CD), and ulcerative colitis (UC). CHR: Chromosome. BP. Base pair position on hg19. SE: standard error.

| Phenotype                      | SNP         | CHR | BP        | Increasing trait/ |              | Phenotype |       | IBD    |       | CD     |       | UC     |       |
|--------------------------------|-------------|-----|-----------|-------------------|--------------|-----------|-------|--------|-------|--------|-------|--------|-------|
|                                |             |     |           | Effect allele     | Other allele | BETA      | SE    | BETA   | SE    | BETA   | SE    | BETA   | SE    |
| Smoking status (ever vs never) | rs12130857  | 1   | 7791461   | G                 | A            | 0.018     | 0.003 | 0.005  | 0.013 | -0.007 | 0.017 | 0.023  | 0.017 |
|                                | rs301807    | 1   | 8484823   | G                 | A            | 0.018     | 0.003 | 0.002  | 0.013 | 0.033  | 0.016 | -0.021 | 0.016 |
|                                | rs3820277   | 1   | 18436657  | G                 | T            | 0.019     | 0.003 | -0.002 | 0.013 | 0.002  | 0.017 | -0.004 | 0.016 |
|                                | rs1889571   | 1   | 32195819  | G                 | T            | 0.022     | 0.004 | -0.033 | 0.019 | -0.036 | 0.024 | -0.031 | 0.024 |
|                                | rs10914684  | 1   | 33795572  | G                 | A            | 0.016     | 0.003 | 0.045  | 0.013 | 0.033  | 0.017 | 0.058  | 0.017 |
|                                | rs2637869   | 1   | 38757237  | A                 | G            | 0.018     | 0.003 | 0.025  | 0.014 | 0.014  | 0.018 | 0.029  | 0.017 |
|                                | rs12755632  | 1   | 41776623  | A                 | G            | 0.015     | 0.003 | -0.027 | 0.013 | -0.027 | 0.017 | -0.024 | 0.017 |
|                                | rs951740    | 1   | 44011737  | A                 | G            | 0.030     | 0.003 | 0.016  | 0.013 | 0.010  | 0.017 | 0.024  | 0.016 |
|                                | rs925524    | 1   | 46496709  | G                 | A            | 0.016     | 0.003 | -0.028 | 0.014 | -0.015 | 0.018 | -0.040 | 0.018 |
|                                | rs12022778  | 1   | 50603995  | C                 | A            | 0.027     | 0.003 | -0.052 | 0.016 | -0.058 | 0.020 | -0.045 | 0.020 |
|                                | rs7553439   | 1   | 50861622  | C                 | T            | 0.018     | 0.003 | -0.020 | 0.015 | -0.047 | 0.019 | 0.003  | 0.019 |
|                                | rs4912332   | 1   | 58815243  | T                 | C            | 0.014     | 0.003 | 0.003  | 0.012 | -0.005 | 0.016 | 0.008  | 0.016 |
|                                | rs6690398   | 1   | 66447394  | A                 | G            | 0.020     | 0.003 | -0.005 | 0.012 | -0.018 | 0.016 | 0.007  | 0.016 |
|                                | rs1022528   | 1   | 71490122  | A                 | G            | 0.017     | 0.003 | -0.024 | 0.013 | -0.041 | 0.017 | -0.018 | 0.017 |
|                                | rs12740789  | 1   | 72752073  | G                 | A            | 0.028     | 0.003 | 0.013  | 0.016 | 0.007  | 0.021 | 0.003  | 0.020 |
|                                | rs10789369  | 1   | 73824909  | A                 | G            | 0.023     | 0.003 | 0.014  | 0.013 | 0.021  | 0.016 | 0.014  | 0.016 |
|                                | rs1514176   | 1   | 74991596  | G                 | A            | 0.019     | 0.003 | -0.008 | 0.013 | -0.002 | 0.016 | -0.010 | 0.016 |
|                                | rs10873871  | 1   | 76689019  | G                 | A            | 0.017     | 0.003 | -0.019 | 0.015 | -0.017 | 0.020 | -0.018 | 0.020 |
|                                | rs11162019  | 1   | 87913176  | C                 | T            | 0.015     | 0.003 | -0.018 | 0.013 | 0.007  | 0.017 | -0.040 | 0.016 |
|                                | rs1008078   | 1   | 91189731  | T                 | C            | 0.023     | 0.003 | 0.019  | 0.013 | 0.008  | 0.017 | 0.020  | 0.016 |
|                                | rs1935571   | 1   | 96414335  | T                 | G            | 0.016     | 0.003 | 0.005  | 0.012 | -0.001 | 0.016 | 0.008  | 0.016 |
|                                | rs12027999  | 1   | 154206358 | T                 | C            | 0.024     | 0.004 | -0.041 | 0.019 | -0.083 | 0.025 | -0.012 | 0.024 |
|                                | rs41264285  | 1   | 155033918 | T                 | C            | 0.020     | 0.003 | 0.089  | 0.016 | 0.094  | 0.020 | 0.078  | 0.020 |
|                                | rs2901785   | 1   | 174104743 | G                 | A            | 0.017     | 0.003 | -0.004 | 0.012 | -0.017 | 0.016 | 0.002  | 0.016 |
|                                | rs147052174 | 1   | 179783167 | T                 | G            | 0.062     | 0.010 | -0.018 | 0.048 | -0.063 | 0.063 | 0.027  | 0.060 |
|                                | rs35656245  | 1   | 190957480 | A                 | G            | 0.016     | 0.003 | 0.005  | 0.014 | -0.009 | 0.018 | 0.016  | 0.018 |
|                                | rs12739243  | 1   | 210302043 | T                 | C            | 0.021     | 0.003 | 0.022  | 0.015 | -0.011 | 0.019 | 0.040  | 0.019 |
|                                | rs12563365  | 1   | 236872829 | A                 | G            | 0.017     | 0.003 | 0.031  | 0.013 | 0.026  | 0.016 | 0.032  | 0.016 |
|                                | rs876793    | 1   | 237852083 | T                 | C            | 0.018     | 0.003 | 0.000  | 0.013 | 0.002  | 0.017 | 0.007  | 0.017 |
|                                | rs62106258  | 2   | 417167    | T                 | C            | 0.045     | 0.006 | 0.011  | 0.032 | 0.042  | 0.042 | -0.021 | 0.040 |
|                                | rs6731872   | 2   | 624205    | G                 | T            | 0.032     | 0.003 | -0.018 | 0.016 | -0.012 | 0.021 | -0.021 | 0.021 |
|                                | rs1022376   | 2   | 22067213  | T                 | C            | 0.015     | 0.003 | -0.004 | 0.013 | -0.003 | 0.016 | -0.003 | 0.016 |
|                                | rs61533748  | 2   | 22582968  | C                 | T            | 0.017     | 0.003 | 0.004  | 0.013 | 0.015  | 0.017 | -0.006 | 0.016 |
|                                | rs72790288  | 2   | 29513404  | G                 | A            | 0.046     | 0.008 | 0.038  | 0.038 | 0.019  | 0.049 | 0.049  | 0.049 |
|                                | rs2710634   | 2   | 32808804  | T                 | C            | 0.018     | 0.003 | -0.018 | 0.013 | -0.010 | 0.016 | -0.029 | 0.016 |
|                                | rs62137126  | 2   | 44250149  | A                 | G            | 0.024     | 0.004 | 0.018  | 0.019 | 0.034  | 0.025 | -0.005 | 0.024 |
|                                | rs1004787   | 2   | 45159091  | A                 | G            | 0.028     | 0.003 | -0.003 | 0.013 | -0.016 | 0.016 | 0.007  | 0.016 |
|                                | rs10490159  | 2   | 51341259  | T                 | C            | 0.017     | 0.003 | 0.026  | 0.013 | 0.031  | 0.016 | 0.018  | 0.016 |
|                                | rs17616642  | 2   | 59022210  | A                 | G            | 0.017     | 0.003 | 0.004  | 0.014 | -0.020 | 0.019 | 0.028  | 0.018 |
|                                | rs6730325   | 2   | 59315828  | G                 | A            | 0.015     | 0.003 | 0.005  | 0.013 | 0.011  | 0.016 | 0.005  | 0.016 |
|                                | rs2539706   | 2   | 59819545  | A                 | G            | 0.016     | 0.003 | 0.009  | 0.012 | 0.016  | 0.016 | 0.001  | 0.016 |
|                                | rs1863161   | 2   | 60139524  | A                 | G            | 0.015     | 0.003 | -0.002 | 0.013 | -0.001 | 0.016 | -0.013 | 0.016 |
|                                | rs359249    | 2   | 60480237  | G                 | A            | 0.022     | 0.003 | -0.007 | 0.013 | -0.006 | 0.017 | -0.004 | 0.016 |

|            |   |           |   |   |       |       |        |       |        |       |        |       |
|------------|---|-----------|---|---|-------|-------|--------|-------|--------|-------|--------|-------|
| rs62180324 | 2 | 63416606  | G | A | 0.020 | 0.003 | -0.014 | 0.015 | -0.029 | 0.020 | -0.001 | 0.019 |
| rs6750107  | 2 | 80748807  | A | G | 0.015 | 0.003 | -0.007 | 0.013 | -0.003 | 0.017 | -0.016 | 0.016 |
| rs12714017 | 2 | 80999398  | C | T | 0.015 | 0.003 | -0.017 | 0.012 | -0.011 | 0.016 | -0.019 | 0.016 |
| rs56208390 | 2 | 83247997  | G | A | 0.022 | 0.004 | 0.010  | 0.019 | 0.013  | 0.025 | 0.011  | 0.024 |
| rs11692435 | 2 | 98275354  | A | G | 0.025 | 0.005 | 0.000  | 0.024 | -0.011 | 0.030 | 0.013  | 0.030 |
| rs13392222 | 2 | 100672408 | A | C | 0.023 | 0.004 | -0.019 | 0.018 | -0.008 | 0.024 | -0.028 | 0.023 |
| rs1901477  | 2 | 104126983 | G | A | 0.030 | 0.003 | 0.005  | 0.012 | 0.016  | 0.016 | 0.004  | 0.016 |
| rs11889814 | 2 | 104432494 | A | C | 0.021 | 0.004 | 0.017  | 0.019 | 0.018  | 0.024 | 0.024  | 0.024 |
| rs3811038  | 2 | 113240183 | C | T | 0.019 | 0.003 | 0.013  | 0.014 | 0.026  | 0.018 | -0.002 | 0.018 |
| rs75210106 | 2 | 113246436 | C | T | 0.019 | 0.003 | 0.023  | 0.017 | 0.025  | 0.021 | 0.023  | 0.021 |
| rs34399632 | 2 | 137571174 | G | A | 0.019 | 0.003 | -0.004 | 0.015 | -0.013 | 0.019 | 0.008  | 0.019 |
| rs74697736 | 2 | 145412271 | A | G | 0.022 | 0.003 | -0.005 | 0.014 | 0.018  | 0.018 | -0.019 | 0.018 |
| rs6756212  | 2 | 146140132 | C | T | 0.034 | 0.003 | -0.043 | 0.013 | -0.027 | 0.016 | -0.055 | 0.016 |
| rs16826827 | 2 | 147825689 | T | C | 0.022 | 0.004 | -0.045 | 0.019 | -0.034 | 0.025 | -0.056 | 0.024 |
| rs1445649  | 2 | 155682556 | C | T | 0.021 | 0.003 | 0.009  | 0.012 | -0.004 | 0.016 | 0.022  | 0.016 |
| rs1722666  | 2 | 161816880 | T | C | 0.016 | 0.003 | -0.030 | 0.014 | -0.014 | 0.018 | -0.039 | 0.018 |
| rs12474587 | 2 | 162802993 | T | G | 0.024 | 0.003 | -0.004 | 0.013 | 0.020  | 0.016 | -0.021 | 0.016 |
| rs357304   | 2 | 164862639 | C | T | 0.017 | 0.003 | -0.018 | 0.014 | 0.003  | 0.018 | -0.030 | 0.018 |
| rs13007361 | 2 | 166250244 | A | G | 0.018 | 0.003 | 0.012  | 0.015 | 0.012  | 0.020 | 0.016  | 0.020 |
| rs7600835  | 2 | 172521827 | G | A | 0.015 | 0.003 | -0.003 | 0.014 | 0.010  | 0.018 | -0.022 | 0.017 |
| rs6750529  | 2 | 182027603 | T | C | 0.020 | 0.003 | 0.013  | 0.014 | 0.034  | 0.018 | -0.011 | 0.018 |
| rs17229285 | 2 | 199523122 | C | T | 0.015 | 0.003 | 0.040  | 0.012 | 0.000  | 0.016 | 0.085  | 0.016 |
| rs3115418  | 2 | 200936399 | T | C | 0.014 | 0.003 | -0.022 | 0.012 | -0.013 | 0.016 | -0.030 | 0.016 |
| rs62193862 | 2 | 202843875 | A | G | 0.024 | 0.004 | -0.036 | 0.022 | -0.057 | 0.029 | -0.027 | 0.028 |
| rs4674916  | 2 | 225365635 | C | A | 0.018 | 0.003 | 0.022  | 0.013 | 0.043  | 0.017 | 0.002  | 0.017 |
| rs4674993  | 2 | 226332033 | A | G | 0.024 | 0.003 | 0.015  | 0.016 | 0.016  | 0.020 | 0.017  | 0.020 |
| rs11713899 | 3 | 2365026   | C | A | 0.019 | 0.003 | -0.023 | 0.016 | 0.003  | 0.021 | -0.045 | 0.021 |
| rs748832   | 3 | 16851202  | G | A | 0.017 | 0.003 | 0.017  | 0.013 | 0.041  | 0.017 | -0.017 | 0.016 |
| rs10446419 | 3 | 25725501  | A | G | 0.020 | 0.003 | -0.006 | 0.016 | 0.005  | 0.021 | -0.010 | 0.020 |
| rs3172494  | 3 | 48731487  | G | T | 0.029 | 0.004 | -0.092 | 0.019 | -0.101 | 0.025 | -0.080 | 0.025 |
| rs2526390  | 3 | 50192760  | T | C | 0.020 | 0.003 | -0.058 | 0.013 | -0.040 | 0.017 | -0.078 | 0.017 |
| rs2276825  | 3 | 52886605  | C | T | 0.019 | 0.003 | -0.050 | 0.015 | -0.046 | 0.019 | -0.046 | 0.019 |
| rs73831818 | 3 | 55988394  | G | A | 0.032 | 0.005 | -0.036 | 0.027 | -0.049 | 0.035 | -0.022 | 0.034 |
| rs1910236  | 3 | 59434420  | A | G | 0.015 | 0.003 | 0.001  | 0.013 | -0.019 | 0.017 | 0.012  | 0.016 |
| rs7640107  | 3 | 59966156  | C | T | 0.014 | 0.003 | 0.020  | 0.013 | 0.012  | 0.016 | 0.026  | 0.016 |
| rs2734390  | 3 | 60459291  | G | A | 0.015 | 0.003 | 0.016  | 0.013 | 0.031  | 0.017 | 0.008  | 0.016 |
| rs221988   | 3 | 64234307  | A | C | 0.015 | 0.003 | -0.015 | 0.013 | -0.014 | 0.017 | -0.015 | 0.017 |
| rs6776440  | 3 | 70888609  | A | G | 0.019 | 0.003 | -0.007 | 0.014 | -0.021 | 0.018 | 0.005  | 0.017 |
| rs62246017 | 3 | 71483084  | G | A | 0.016 | 0.003 | 0.021  | 0.013 | 0.002  | 0.017 | 0.034  | 0.017 |
| rs57876564 | 3 | 75000248  | T | G | 0.022 | 0.003 | -0.024 | 0.016 | -0.024 | 0.020 | -0.024 | 0.020 |
| rs6782116  | 3 | 77176032  | C | T | 0.015 | 0.003 | 0.008  | 0.013 | -0.001 | 0.016 | 0.007  | 0.016 |
| rs13066050 | 3 | 81325861  | T | C | 0.019 | 0.003 | 0.006  | 0.015 | -0.014 | 0.020 | 0.019  | 0.020 |
| rs1549979  | 3 | 85460131  | C | T | 0.025 | 0.003 | -0.039 | 0.013 | -0.029 | 0.016 | -0.050 | 0.016 |
| rs57153235 | 3 | 85902536  | T | G | 0.019 | 0.003 | -0.032 | 0.013 | -0.041 | 0.017 | -0.030 | 0.017 |
| rs6437769  | 3 | 107997514 | T | C | 0.014 | 0.003 | 0.023  | 0.013 | 0.023  | 0.016 | 0.026  | 0.016 |
| rs9288999  | 3 | 114147927 | A | G | 0.017 | 0.003 | 0.016  | 0.014 | 0.033  | 0.019 | 0.014  | 0.018 |
| rs6438436  | 3 | 117822149 | T | C | 0.025 | 0.003 | 0.009  | 0.016 | 0.016  | 0.021 | 0.004  | 0.021 |
| rs12053870 | 3 | 118302515 | G | T | 0.016 | 0.003 | 0.002  | 0.013 | 0.009  | 0.016 | 0.001  | 0.016 |
| rs2279829  | 3 | 147106319 | C | T | 0.017 | 0.003 | 0.001  | 0.015 | 0.012  | 0.020 | -0.009 | 0.019 |
| rs2319545  | 3 | 147719648 | A | C | 0.023 | 0.004 | -0.004 | 0.018 | -0.055 | 0.023 | 0.017  | 0.022 |
| rs10935779 | 3 | 149543102 | C | T | 0.014 | 0.003 | -0.005 | 0.013 | -0.012 | 0.016 | 0.002  | 0.016 |

|             |   |           |   |   |       |       |        |       |        |       |        |       |
|-------------|---|-----------|---|---|-------|-------|--------|-------|--------|-------|--------|-------|
| rs963354    | 3 | 157393770 | A | C | 0.015 | 0.003 | -0.006 | 0.013 | -0.029 | 0.017 | 0.014  | 0.017 |
| rs1714521   | 3 | 158284861 | A | C | 0.016 | 0.003 | -0.022 | 0.013 | -0.019 | 0.016 | -0.015 | 0.016 |
| rs1449012   | 3 | 159048333 | C | T | 0.015 | 0.003 | 0.007  | 0.013 | 0.014  | 0.016 | -0.003 | 0.016 |
| rs9850597   | 3 | 161761866 | G | A | 0.019 | 0.003 | -0.002 | 0.016 | 0.007  | 0.021 | -0.011 | 0.020 |
| rs1187820   | 3 | 173072584 | C | T | 0.014 | 0.003 | 0.001  | 0.013 | 0.009  | 0.017 | -0.011 | 0.016 |
| rs16828799  | 3 | 173353739 | T | G | 0.020 | 0.004 | -0.015 | 0.017 | -0.018 | 0.022 | 0.001  | 0.022 |
| rs9841807   | 3 | 175718927 | T | C | 0.016 | 0.003 | 0.027  | 0.014 | 0.035  | 0.018 | 0.024  | 0.018 |
| rs7631379   | 3 | 181409057 | C | T | 0.021 | 0.003 | 0.008  | 0.017 | 0.009  | 0.022 | 0.018  | 0.021 |
| rs973629    | 4 | 15463221  | A | G | 0.014 | 0.003 | -0.005 | 0.013 | 0.020  | 0.016 | -0.030 | 0.016 |
| rs12642744  | 4 | 28027176  | G | T | 0.017 | 0.003 | -0.005 | 0.014 | -0.006 | 0.018 | 0.000  | 0.018 |
| rs59537158  | 4 | 28246049  | T | C | 0.022 | 0.003 | 0.000  | 0.016 | 0.006  | 0.020 | 0.002  | 0.020 |
| rs73123371  | 4 | 28813881  | T | C | 0.017 | 0.003 | 0.013  | 0.014 | 0.027  | 0.019 | 0.003  | 0.018 |
| rs55944129  | 4 | 29082156  | T | C | 0.018 | 0.003 | -0.013 | 0.014 | -0.002 | 0.018 | -0.024 | 0.018 |
| rs58400863  | 4 | 31184484  | G | A | 0.020 | 0.003 | -0.013 | 0.013 | -0.020 | 0.017 | -0.004 | 0.017 |
| rs13142792  | 4 | 35512296  | C | T | 0.019 | 0.003 | -0.023 | 0.012 | -0.018 | 0.016 | -0.020 | 0.016 |
| rs112725451 | 4 | 68017710  | T | C | 0.026 | 0.003 | 0.008  | 0.016 | 0.012  | 0.021 | 0.005  | 0.021 |
| rs10021088  | 4 | 94059475  | C | T | 0.015 | 0.003 | -0.026 | 0.012 | -0.019 | 0.016 | -0.028 | 0.016 |
| rs1435479   | 4 | 94550450  | T | G | 0.016 | 0.003 | -0.003 | 0.014 | -0.005 | 0.018 | -0.004 | 0.017 |
| rs3934797   | 4 | 112467612 | G | A | 0.021 | 0.003 | -0.005 | 0.017 | 0.023  | 0.021 | -0.031 | 0.021 |
| rs71602617  | 4 | 136406155 | C | T | 0.018 | 0.003 | -0.005 | 0.015 | 0.000  | 0.020 | -0.003 | 0.019 |
| rs7696257   | 4 | 137474783 | A | G | 0.015 | 0.003 | 0.000  | 0.013 | 0.003  | 0.017 | 0.005  | 0.016 |
| rs13109980  | 4 | 140886963 | G | A | 0.022 | 0.003 | -0.013 | 0.013 | 0.016  | 0.017 | -0.029 | 0.017 |
| rs1116690   | 4 | 143510148 | G | A | 0.016 | 0.003 | 0.019  | 0.014 | 0.035  | 0.018 | 0.000  | 0.018 |
| rs13110073  | 4 | 147797913 | T | C | 0.025 | 0.003 | 0.002  | 0.013 | 0.001  | 0.016 | 0.001  | 0.016 |
| rs62334821  | 4 | 176865038 | A | G | 0.017 | 0.003 | -0.009 | 0.016 | -0.010 | 0.020 | -0.020 | 0.020 |
| rs12517438  | 5 | 30842054  | G | T | 0.015 | 0.003 | -0.005 | 0.012 | -0.008 | 0.016 | -0.005 | 0.016 |
| rs71627581  | 5 | 43161351  | G | A | 0.027 | 0.004 | 0.019  | 0.022 | 0.031  | 0.028 | 0.014  | 0.028 |
| rs10052591  | 5 | 50812738  | T | C | 0.016 | 0.003 | 0.009  | 0.013 | 0.021  | 0.016 | 0.009  | 0.016 |
| rs71592686  | 5 | 60121271  | C | T | 0.021 | 0.003 | -0.006 | 0.014 | 0.013  | 0.018 | -0.032 | 0.018 |
| rs2028269   | 5 | 79308315  | A | G | 0.016 | 0.003 | 0.012  | 0.013 | 0.007  | 0.016 | 0.016  | 0.016 |
| rs6874731   | 5 | 80263865  | G | T | 0.015 | 0.003 | -0.020 | 0.013 | -0.001 | 0.016 | -0.041 | 0.016 |
| rs10075489  | 5 | 88872383  | T | C | 0.018 | 0.003 | -0.004 | 0.014 | -0.007 | 0.018 | -0.013 | 0.017 |
| rs181508347 | 5 | 91366274  | G | T | 0.081 | 0.013 | 0.019  | 0.070 | 0.026  | 0.088 | 0.034  | 0.091 |
| rs42417     | 5 | 94198290  | T | C | 0.017 | 0.003 | 0.002  | 0.014 | -0.027 | 0.018 | 0.021  | 0.018 |
| rs72780746  | 5 | 103929588 | T | C | 0.026 | 0.003 | 0.017  | 0.016 | 0.013  | 0.021 | 0.017  | 0.021 |
| rs10060196  | 5 | 106455988 | A | C | 0.018 | 0.003 | -0.011 | 0.013 | -0.009 | 0.016 | -0.014 | 0.016 |
| rs17534089  | 5 | 106829219 | A | G | 0.026 | 0.004 | -0.026 | 0.018 | -0.050 | 0.023 | -0.001 | 0.023 |
| rs17165769  | 5 | 107365642 | G | A | 0.016 | 0.003 | 0.013  | 0.013 | 0.016  | 0.016 | 0.007  | 0.016 |
| rs329124    | 5 | 133865452 | A | G | 0.016 | 0.003 | -0.034 | 0.013 | -0.036 | 0.016 | -0.024 | 0.016 |
| rs1385108   | 5 | 154839646 | T | C | 0.019 | 0.003 | -0.001 | 0.014 | 0.000  | 0.019 | -0.010 | 0.018 |
| rs1173461   | 5 | 157707571 | T | C | 0.017 | 0.003 | 0.011  | 0.013 | 0.017  | 0.017 | -0.003 | 0.017 |
| rs3909281   | 5 | 165096435 | G | T | 0.021 | 0.003 | -0.012 | 0.013 | -0.028 | 0.017 | -0.003 | 0.016 |
| rs3843905   | 5 | 165427280 | C | T | 0.015 | 0.003 | 0.003  | 0.013 | 0.000  | 0.016 | 0.003  | 0.016 |
| rs79476395  | 5 | 166063680 | G | A | 0.033 | 0.005 | -0.012 | 0.024 | -0.008 | 0.031 | -0.016 | 0.030 |
| rs6890961   | 5 | 166778503 | C | T | 0.019 | 0.003 | 0.001  | 0.014 | -0.002 | 0.018 | 0.003  | 0.017 |
| rs4044321   | 5 | 166989513 | A | G | 0.023 | 0.003 | 0.021  | 0.013 | 0.027  | 0.017 | 0.016  | 0.016 |
| rs10042827  | 5 | 170299916 | C | T | 0.017 | 0.003 | -0.010 | 0.013 | -0.007 | 0.017 | -0.008 | 0.017 |
| rs359431    | 5 | 173288534 | C | T | 0.014 | 0.003 | -0.042 | 0.013 | -0.063 | 0.016 | -0.027 | 0.016 |
| rs1059490   | 6 | 26171250  | T | C | 0.019 | 0.003 | -0.004 | 0.013 | 0.005  | 0.017 | -0.003 | 0.016 |
| rs1150668   | 6 | 28129789  | T | G | 0.019 | 0.003 | -0.007 | 0.013 | -0.005 | 0.016 | -0.007 | 0.016 |
| rs1632941   | 6 | 29796685  | T | C | 0.016 | 0.003 | 0.049  | 0.014 | 0.067  | 0.018 | 0.034  | 0.018 |

|             |   |           |   |   |       |       |        |       |        |       |        |       |
|-------------|---|-----------|---|---|-------|-------|--------|-------|--------|-------|--------|-------|
| rs3218116   | 6 | 41901763  | C | T | 0.020 | 0.003 | -0.011 | 0.014 | 0.001  | 0.018 | -0.022 | 0.018 |
| rs160631    | 6 | 52895230  | T | G | 0.017 | 0.003 | -0.027 | 0.014 | 0.009  | 0.018 | -0.055 | 0.018 |
| rs7743165   | 6 | 67521222  | G | T | 0.019 | 0.003 | 0.009  | 0.012 | 0.027  | 0.016 | -0.004 | 0.016 |
| rs10945141  | 6 | 69470709  | A | G | 0.018 | 0.003 | -0.004 | 0.014 | -0.003 | 0.018 | -0.003 | 0.018 |
| rs4707675   | 6 | 92221558  | G | A | 0.014 | 0.003 | 0.009  | 0.012 | 0.003  | 0.016 | 0.018  | 0.016 |
| rs619087    | 6 | 94175279  | G | A | 0.014 | 0.003 | -0.015 | 0.013 | -0.005 | 0.016 | -0.021 | 0.016 |
| rs6568832   | 6 | 97702876  | A | G | 0.019 | 0.003 | -0.005 | 0.014 | -0.035 | 0.019 | 0.019  | 0.018 |
| rs12195240  | 6 | 98636905  | A | G | 0.025 | 0.003 | 0.011  | 0.014 | 0.008  | 0.018 | 0.021  | 0.017 |
| rs6936160   | 6 | 100347745 | T | C | 0.020 | 0.003 | -0.017 | 0.014 | -0.027 | 0.018 | -0.006 | 0.017 |
| rs12530388  | 6 | 101329173 | A | C | 0.018 | 0.003 | -0.011 | 0.012 | -0.016 | 0.016 | -0.013 | 0.016 |
| rs3800227   | 6 | 108994161 | G | A | 0.017 | 0.003 | 0.010  | 0.014 | -0.002 | 0.018 | 0.026  | 0.018 |
| rs118202    | 6 | 111658371 | G | T | 0.037 | 0.003 | -0.009 | 0.016 | 0.008  | 0.021 | -0.027 | 0.020 |
| rs9331343   | 6 | 157738258 | T | C | 0.014 | 0.003 | -0.006 | 0.014 | -0.006 | 0.019 | -0.004 | 0.018 |
| rs10698713  | 6 | 158882320 | G | A | 0.034 | 0.006 | 0.000  | 0.027 | -0.027 | 0.035 | 0.024  | 0.035 |
| rs1764021   | 6 | 163805682 | C | T | 0.017 | 0.003 | 0.009  | 0.014 | 0.010  | 0.018 | 0.015  | 0.018 |
| rs10272990  | 7 | 1703675   | T | C | 0.021 | 0.003 | 0.022  | 0.013 | 0.016  | 0.017 | 0.035  | 0.017 |
| rs57257948  | 7 | 3330595   | C | T | 0.019 | 0.003 | 0.010  | 0.014 | -0.011 | 0.018 | 0.031  | 0.018 |
| rs7809303   | 7 | 69484366  | G | A | 0.021 | 0.003 | 0.004  | 0.013 | -0.006 | 0.017 | 0.017  | 0.017 |
| rs7802996   | 7 | 77771983  | C | T | 0.021 | 0.003 | -0.004 | 0.017 | -0.017 | 0.022 | 0.011  | 0.021 |
| rs1030015   | 7 | 78139581  | T | G | 0.014 | 0.003 | 0.011  | 0.012 | 0.036  | 0.016 | -0.016 | 0.016 |
| rs4727189   | 7 | 88442568  | C | T | 0.015 | 0.003 | 0.022  | 0.013 | 0.027  | 0.017 | 0.022  | 0.017 |
| rs12673563  | 7 | 91280470  | C | T | 0.023 | 0.004 | -0.040 | 0.021 | -0.022 | 0.027 | -0.060 | 0.026 |
| rs1799068   | 7 | 97707069  | T | G | 0.017 | 0.003 | -0.002 | 0.013 | 0.027  | 0.016 | -0.033 | 0.016 |
| rs13437771  | 7 | 99071478  | A | G | 0.027 | 0.004 | -0.015 | 0.017 | -0.007 | 0.022 | -0.025 | 0.022 |
| rs11766326  | 7 | 111100585 | T | C | 0.018 | 0.003 | -0.026 | 0.013 | -0.011 | 0.016 | -0.036 | 0.016 |
| rs6968380   | 7 | 114940159 | G | A | 0.023 | 0.003 | 0.005  | 0.014 | 0.018  | 0.018 | 0.005  | 0.017 |
| rs112913817 | 7 | 115077394 | G | A | 0.078 | 0.012 | -0.071 | 0.065 | -0.040 | 0.082 | -0.090 | 0.082 |
| rs10233018  | 7 | 117523709 | G | A | 0.025 | 0.003 | -0.009 | 0.012 | 0.016  | 0.016 | -0.020 | 0.016 |
| rs10953957  | 7 | 121954709 | A | G | 0.014 | 0.003 | -0.002 | 0.013 | 0.012  | 0.017 | -0.013 | 0.016 |
| rs77283305  | 7 | 132593831 | G | A | 0.015 | 0.003 | 0.013  | 0.013 | 0.003  | 0.017 | 0.020  | 0.017 |
| rs10279261  | 7 | 133589846 | G | A | 0.019 | 0.003 | 0.004  | 0.013 | 0.008  | 0.017 | 0.003  | 0.016 |
| rs1561112   | 7 | 133840652 | T | C | 0.015 | 0.003 | 0.008  | 0.013 | 0.013  | 0.017 | 0.012  | 0.016 |
| rs4840525   | 8 | 10765635  | C | A | 0.018 | 0.003 | 0.015  | 0.012 | 0.035  | 0.016 | -0.009 | 0.016 |
| rs11783093  | 8 | 27425349  | C | T | 0.047 | 0.003 | -0.004 | 0.017 | 0.003  | 0.022 | 0.004  | 0.022 |
| rs7836565   | 8 | 52569449  | C | T | 0.016 | 0.003 | 0.026  | 0.014 | 0.025  | 0.018 | 0.019  | 0.018 |
| rs13261666  | 8 | 59814666  | G | T | 0.020 | 0.003 | 0.034  | 0.012 | 0.037  | 0.016 | 0.035  | 0.016 |
| rs2063976   | 8 | 91096366  | C | T | 0.020 | 0.003 | -0.018 | 0.013 | -0.017 | 0.017 | -0.018 | 0.017 |
| rs6993429   | 8 | 92733282  | C | A | 0.019 | 0.003 | 0.013  | 0.012 | 0.012  | 0.016 | 0.003  | 0.016 |
| rs6986430   | 8 | 93048104  | T | C | 0.024 | 0.003 | 0.007  | 0.015 | -0.003 | 0.019 | 0.007  | 0.019 |
| rs9987376   | 8 | 93190014  | T | G | 0.020 | 0.003 | 0.014  | 0.013 | 0.008  | 0.016 | 0.020  | 0.016 |
| rs290601    | 8 | 115374642 | T | C | 0.016 | 0.003 | -0.022 | 0.014 | -0.019 | 0.018 | -0.023 | 0.018 |
| rs3847244   | 9 | 3025368   | T | C | 0.019 | 0.003 | 0.015  | 0.013 | 0.031  | 0.016 | 0.002  | 0.016 |
| rs11791671  | 9 | 3398679   | T | C | 0.028 | 0.005 | -0.049 | 0.025 | -0.045 | 0.032 | -0.054 | 0.031 |
| rs7024924   | 9 | 8282399   | C | T | 0.019 | 0.003 | 0.036  | 0.016 | 0.054  | 0.021 | 0.016  | 0.021 |
| rs2382252   | 9 | 10988832  | C | A | 0.016 | 0.003 | -0.007 | 0.013 | -0.004 | 0.016 | -0.008 | 0.016 |
| rs2078580   | 9 | 11159452  | A | G | 0.018 | 0.003 | -0.003 | 0.012 | 0.008  | 0.016 | -0.010 | 0.016 |
| rs7867822   | 9 | 20676454  | A | G | 0.015 | 0.003 | -0.020 | 0.013 | -0.024 | 0.017 | -0.018 | 0.017 |
| rs10966092  | 9 | 23831658  | T | C | 0.020 | 0.003 | -0.001 | 0.014 | -0.001 | 0.018 | -0.002 | 0.018 |
| rs988961    | 9 | 29746545  | G | A | 0.014 | 0.003 | 0.001  | 0.012 | -0.025 | 0.016 | 0.020  | 0.016 |
| rs4877285   | 9 | 81354129  | G | A | 0.018 | 0.003 | 0.004  | 0.014 | 0.031  | 0.017 | -0.022 | 0.017 |
| rs1930371   | 9 | 81444104  | C | T | 0.017 | 0.003 | 0.024  | 0.014 | 0.028  | 0.019 | 0.016  | 0.018 |

|            |    |           |   |   |       |       |        |       |        |       |        |       |
|------------|----|-----------|---|---|-------|-------|--------|-------|--------|-------|--------|-------|
| rs2378662  | 9  | 86707289  | A | G | 0.015 | 0.003 | -0.001 | 0.013 | 0.009  | 0.016 | -0.007 | 0.016 |
| rs1927901  | 9  | 120519111 | T | C | 0.014 | 0.003 | 0.009  | 0.012 | 0.021  | 0.016 | 0.001  | 0.016 |
| rs4837631  | 9  | 122061948 | C | T | 0.015 | 0.003 | 0.003  | 0.012 | -0.003 | 0.016 | 0.012  | 0.016 |
| rs1759433  | 9  | 128073097 | A | G | 0.015 | 0.003 | -0.003 | 0.013 | 0.008  | 0.016 | -0.015 | 0.016 |
| rs34553878 | 9  | 134334588 | G | A | 0.025 | 0.004 | 0.014  | 0.021 | 0.042  | 0.027 | -0.017 | 0.027 |
| rs7026534  | 9  | 134907263 | T | G | 0.017 | 0.003 | 0.020  | 0.014 | 0.029  | 0.018 | 0.014  | 0.017 |
| rs10905461 | 10 | 8803551   | T | C | 0.016 | 0.003 | -0.010 | 0.014 | -0.011 | 0.018 | -0.005 | 0.018 |
| rs10905649 | 10 | 10042641  | C | T | 0.016 | 0.003 | -0.031 | 0.012 | -0.035 | 0.016 | -0.023 | 0.016 |
| rs1291821  | 10 | 11133823  | G | A | 0.014 | 0.003 | 0.017  | 0.012 | -0.002 | 0.016 | 0.034  | 0.016 |
| rs11258417 | 10 | 13533053  | C | T | 0.015 | 0.003 | -0.006 | 0.013 | -0.023 | 0.016 | 0.014  | 0.016 |
| rs7072776  | 10 | 22032942  | A | G | 0.022 | 0.003 | 0.021  | 0.014 | 0.003  | 0.018 | 0.032  | 0.018 |
| rs2796793  | 10 | 36634124  | A | G | 0.014 | 0.003 | 0.013  | 0.012 | 0.019  | 0.016 | 0.022  | 0.016 |
| rs1733760  | 10 | 56698174  | C | T | 0.015 | 0.003 | 0.046  | 0.012 | 0.043  | 0.016 | 0.044  | 0.016 |
| rs7083526  | 10 | 63675843  | T | C | 0.023 | 0.003 | -0.010 | 0.013 | -0.008 | 0.016 | -0.009 | 0.016 |
| rs7901883  | 10 | 103186838 | G | A | 0.019 | 0.003 | 0.024  | 0.015 | 0.011  | 0.019 | 0.023  | 0.019 |
| rs11594623 | 10 | 103960351 | C | T | 0.027 | 0.003 | 0.011  | 0.015 | 0.017  | 0.019 | 0.002  | 0.018 |
| rs12244388 | 10 | 104640052 | A | G | 0.026 | 0.003 | -0.005 | 0.013 | -0.001 | 0.017 | 0.003  | 0.017 |
| rs34970111 | 10 | 106078937 | C | T | 0.015 | 0.003 | -0.001 | 0.013 | -0.004 | 0.017 | 0.007  | 0.016 |
| rs9787523  | 10 | 106460460 | T | C | 0.016 | 0.003 | 0.007  | 0.013 | 0.006  | 0.016 | 0.006  | 0.016 |
| rs11192347 | 10 | 106929313 | G | A | 0.026 | 0.004 | 0.016  | 0.020 | 0.012  | 0.026 | 0.014  | 0.026 |
| rs10885480 | 10 | 115378364 | T | C | 0.019 | 0.003 | 0.011  | 0.014 | 0.026  | 0.018 | -0.010 | 0.018 |
| rs4752018  | 10 | 118678712 | A | C | 0.019 | 0.003 | -0.036 | 0.015 | -0.043 | 0.019 | -0.034 | 0.019 |
| rs6265     | 11 | 27679916  | C | T | 0.029 | 0.003 | 0.008  | 0.016 | -0.026 | 0.020 | 0.030  | 0.020 |
| rs4275621  | 11 | 28652996  | A | G | 0.021 | 0.003 | -0.016 | 0.013 | -0.009 | 0.017 | -0.018 | 0.016 |
| rs62618693 | 11 | 32956492  | C | T | 0.035 | 0.006 | 0.043  | 0.032 | 0.012  | 0.042 | 0.044  | 0.041 |
| rs2939756  | 11 | 41436297  | G | A | 0.016 | 0.003 | 0.022  | 0.012 | 0.023  | 0.016 | 0.021  | 0.016 |
| rs1381775  | 11 | 42442826  | T | C | 0.016 | 0.003 | -0.011 | 0.014 | 0.003  | 0.018 | -0.020 | 0.018 |
| rs2959084  | 11 | 46078656  | A | G | 0.017 | 0.003 | 0.014  | 0.014 | 0.027  | 0.018 | 0.000  | 0.017 |
| rs3740977  | 11 | 46393574  | C | T | 0.019 | 0.003 | 0.004  | 0.017 | 0.006  | 0.022 | 0.010  | 0.021 |
| rs61886926 | 11 | 64133552  | C | T | 0.018 | 0.003 | 0.055  | 0.013 | 0.077  | 0.017 | 0.031  | 0.016 |
| rs61884449 | 11 | 64485193  | T | C | 0.020 | 0.004 | 0.001  | 0.018 | 0.010  | 0.023 | -0.017 | 0.023 |
| rs644740   | 11 | 65561468  | C | T | 0.014 | 0.003 | 0.023  | 0.012 | 0.029  | 0.016 | 0.023  | 0.016 |
| rs7943721  | 11 | 73309393  | G | A | 0.021 | 0.003 | 0.004  | 0.018 | -0.006 | 0.023 | 0.017  | 0.023 |
| rs7929518  | 11 | 85980958  | G | A | 0.019 | 0.003 | -0.022 | 0.015 | -0.015 | 0.019 | -0.015 | 0.019 |
| rs586699   | 11 | 92289734  | G | A | 0.015 | 0.003 | -0.015 | 0.012 | -0.030 | 0.016 | 0.006  | 0.016 |
| rs2155646  | 11 | 112912811 | C | T | 0.038 | 0.003 | 0.002  | 0.013 | -0.012 | 0.016 | 0.015  | 0.016 |
| rs1713676  | 11 | 113660576 | A | G | 0.017 | 0.003 | 0.013  | 0.012 | 0.021  | 0.016 | 0.004  | 0.016 |
| rs238896   | 11 | 113994505 | G | A | 0.017 | 0.003 | 0.033  | 0.013 | 0.038  | 0.016 | 0.017  | 0.016 |
| rs540860   | 11 | 121530888 | G | A | 0.018 | 0.003 | -0.002 | 0.013 | 0.010  | 0.016 | -0.012 | 0.016 |
| rs1944689  | 11 | 121634334 | T | G | 0.018 | 0.003 | -0.054 | 0.015 | -0.047 | 0.019 | -0.059 | 0.019 |
| rs1834306  | 11 | 122023187 | A | G | 0.014 | 0.003 | 0.019  | 0.013 | -0.008 | 0.017 | 0.044  | 0.017 |
| rs1106363  | 11 | 131966264 | T | C | 0.017 | 0.003 | -0.007 | 0.013 | -0.032 | 0.017 | 0.011  | 0.017 |
| rs2010921  | 11 | 132098205 | A | G | 0.017 | 0.003 | -0.005 | 0.014 | 0.012  | 0.018 | -0.022 | 0.017 |
| rs11057005 | 12 | 16748721  | A | G | 0.016 | 0.003 | -0.019 | 0.013 | -0.034 | 0.016 | -0.018 | 0.016 |
| rs13906    | 12 | 49952394  | C | T | 0.025 | 0.004 | 0.005  | 0.020 | -0.019 | 0.026 | 0.018  | 0.025 |
| rs4759229  | 12 | 56474480  | G | A | 0.016 | 0.003 | -0.011 | 0.013 | -0.016 | 0.017 | -0.012 | 0.017 |
| rs7969559  | 12 | 69655167  | A | G | 0.017 | 0.003 | 0.025  | 0.014 | 0.042  | 0.018 | 0.016  | 0.017 |
| rs7134009  | 12 | 75263193  | T | C | 0.016 | 0.003 | 0.012  | 0.014 | 0.020  | 0.018 | 0.001  | 0.018 |
| rs77215829 | 12 | 112618346 | A | C | 0.024 | 0.004 | 0.089  | 0.020 | 0.083  | 0.025 | 0.093  | 0.025 |
| rs1109480  | 12 | 121083279 | G | A | 0.017 | 0.003 | -0.011 | 0.013 | 0.000  | 0.017 | -0.015 | 0.017 |
| rs11611651 | 12 | 133380790 | A | G | 0.027 | 0.005 | -0.001 | 0.023 | 0.012  | 0.029 | 0.000  | 0.029 |

|             |    |           |   |   |       |       |        |       |        |       |        |       |
|-------------|----|-----------|---|---|-------|-------|--------|-------|--------|-------|--------|-------|
| rs17197663  | 13 | 38172867  | G | A | 0.022 | 0.004 | -0.034 | 0.018 | 0.000  | 0.024 | -0.075 | 0.023 |
| rs4264267   | 13 | 38359676  | T | C | 0.015 | 0.003 | 0.003  | 0.013 | 0.012  | 0.016 | -0.003 | 0.016 |
| rs61959481  | 13 | 55834929  | G | A | 0.020 | 0.003 | -0.005 | 0.016 | -0.004 | 0.020 | -0.016 | 0.020 |
| rs3098272   | 13 | 55931424  | A | C | 0.018 | 0.003 | 0.026  | 0.016 | 0.028  | 0.020 | 0.017  | 0.020 |
| rs9538162   | 13 | 59265043  | C | T | 0.017 | 0.003 | 0.014  | 0.013 | 0.032  | 0.016 | 0.001  | 0.016 |
| rs1413119   | 13 | 59339281  | C | T | 0.015 | 0.003 | 0.021  | 0.013 | 0.032  | 0.016 | 0.007  | 0.016 |
| rs56367474  | 13 | 59454139  | C | T | 0.017 | 0.003 | 0.042  | 0.014 | 0.046  | 0.018 | 0.032  | 0.018 |
| rs55786907  | 13 | 59871584  | G | A | 0.019 | 0.003 | -0.017 | 0.017 | -0.008 | 0.022 | -0.026 | 0.021 |
| rs4886207   | 13 | 60705792  | T | C | 0.016 | 0.003 | 0.010  | 0.013 | 0.016  | 0.017 | 0.008  | 0.016 |
| rs9540731   | 13 | 66949370  | C | T | 0.018 | 0.003 | 0.001  | 0.012 | 0.014  | 0.016 | -0.012 | 0.016 |
| rs9545155   | 13 | 80191873  | T | C | 0.016 | 0.003 | -0.011 | 0.012 | -0.024 | 0.016 | 0.002  | 0.016 |
| rs1772572   | 13 | 81191176  | C | A | 0.017 | 0.003 | 0.002  | 0.013 | -0.012 | 0.017 | 0.013  | 0.017 |
| rs75674569  | 13 | 96823724  | G | A | 0.025 | 0.004 | 0.015  | 0.021 | -0.006 | 0.026 | 0.044  | 0.026 |
| rs7333559   | 13 | 100546450 | G | A | 0.023 | 0.003 | 0.010  | 0.016 | -0.007 | 0.021 | 0.022  | 0.020 |
| rs12855717  | 13 | 101252635 | T | C | 0.016 | 0.003 | 0.019  | 0.013 | 0.001  | 0.016 | 0.032  | 0.016 |
| rs12878369  | 14 | 28346502  | A | C | 0.017 | 0.003 | 0.006  | 0.013 | -0.011 | 0.016 | 0.015  | 0.016 |
| rs9323328   | 14 | 58653514  | A | G | 0.014 | 0.003 | 0.011  | 0.013 | 0.012  | 0.016 | 0.013  | 0.016 |
| rs1811739   | 14 | 77529375  | A | G | 0.018 | 0.003 | -0.006 | 0.014 | -0.001 | 0.019 | -0.016 | 0.018 |
| rs8005334   | 14 | 79563654  | G | T | 0.017 | 0.003 | -0.003 | 0.013 | -0.018 | 0.016 | 0.001  | 0.016 |
| rs34940743  | 14 | 80102233  | G | A | 0.016 | 0.003 | 0.006  | 0.014 | -0.016 | 0.018 | 0.018  | 0.018 |
| rs2925128   | 14 | 98362355  | T | C | 0.017 | 0.003 | 0.011  | 0.013 | 0.004  | 0.016 | 0.011  | 0.016 |
| rs1381287   | 14 | 98597552  | T | C | 0.018 | 0.003 | -0.008 | 0.013 | -0.022 | 0.016 | 0.007  | 0.016 |
| rs55913542  | 14 | 99693843  | T | G | 0.019 | 0.003 | -0.002 | 0.016 | 0.000  | 0.021 | 0.018  | 0.021 |
| rs1435672   | 15 | 36399479  | C | T | 0.014 | 0.003 | 0.018  | 0.012 | 0.025  | 0.016 | 0.020  | 0.016 |
| rs281296    | 15 | 47685010  | A | G | 0.025 | 0.003 | 0.031  | 0.013 | 0.030  | 0.017 | 0.036  | 0.017 |
| rs56902655  | 15 | 63898709  | T | G | 0.022 | 0.004 | 0.017  | 0.018 | 0.023  | 0.023 | 0.007  | 0.023 |
| rs2289791   | 15 | 67476952  | G | T | 0.018 | 0.003 | 0.055  | 0.015 | 0.064  | 0.019 | 0.053  | 0.019 |
| rs60833441  | 15 | 74048768  | A | G | 0.014 | 0.003 | -0.006 | 0.012 | 0.020  | 0.016 | -0.029 | 0.016 |
| rs62007780  | 15 | 78025464  | G | T | 0.016 | 0.003 | 0.004  | 0.013 | 0.022  | 0.016 | -0.013 | 0.016 |
| rs55958435  | 15 | 96852638  | A | G | 0.018 | 0.003 | 0.030  | 0.015 | 0.041  | 0.019 | 0.022  | 0.019 |
| rs8027457   | 15 | 99204101  | C | T | 0.015 | 0.003 | 0.034  | 0.013 | 0.035  | 0.016 | 0.033  | 0.016 |
| rs1139897   | 16 | 720986    | G | A | 0.024 | 0.003 | -0.008 | 0.015 | -0.003 | 0.019 | -0.007 | 0.019 |
| rs11076962  | 16 | 5811367   | C | T | 0.018 | 0.003 | -0.007 | 0.014 | -0.015 | 0.018 | -0.004 | 0.018 |
| rs7192140   | 16 | 10173748  | T | C | 0.017 | 0.003 | -0.023 | 0.012 | -0.027 | 0.016 | -0.020 | 0.016 |
| rs9922607   | 16 | 17570220  | C | T | 0.022 | 0.003 | 0.011  | 0.016 | -0.015 | 0.020 | 0.023  | 0.020 |
| rs7188873   | 16 | 24727064  | G | A | 0.020 | 0.003 | 0.031  | 0.013 | 0.041  | 0.017 | 0.025  | 0.016 |
| rs6497840   | 16 | 25351633  | A | G | 0.023 | 0.003 | -0.012 | 0.014 | -0.022 | 0.018 | 0.012  | 0.018 |
| rs4785187   | 16 | 49766772  | A | G | 0.020 | 0.003 | 0.018  | 0.015 | 0.019  | 0.020 | 0.020  | 0.019 |
| rs8050598   | 16 | 49891964  | T | C | 0.019 | 0.003 | -0.014 | 0.016 | -0.047 | 0.020 | 0.006  | 0.020 |
| rs12918191  | 16 | 50945156  | A | G | 0.020 | 0.003 | -0.027 | 0.015 | -0.044 | 0.019 | -0.007 | 0.019 |
| rs9302604   | 16 | 69576894  | G | A | 0.019 | 0.003 | 0.030  | 0.012 | 0.030  | 0.016 | 0.031  | 0.016 |
| rs9936784   | 16 | 72230694  | G | T | 0.014 | 0.003 | -0.027 | 0.012 | -0.056 | 0.016 | 0.002  | 0.016 |
| rs62052918  | 16 | 72578594  | T | G | 0.032 | 0.005 | 0.021  | 0.024 | -0.003 | 0.032 | 0.012  | 0.031 |
| rs4788676   | 16 | 72950468  | T | C | 0.018 | 0.003 | -0.027 | 0.015 | -0.032 | 0.019 | -0.028 | 0.019 |
| rs117657830 | 16 | 75766873  | A | G | 0.038 | 0.006 | -0.010 | 0.032 | 0.008  | 0.041 | -0.043 | 0.040 |
| rs1050847   | 16 | 87443734  | C | T | 0.015 | 0.003 | 0.001  | 0.013 | 0.008  | 0.016 | 0.010  | 0.016 |
| rs11642231  | 16 | 89608702  | G | A | 0.016 | 0.003 | 0.013  | 0.013 | 0.026  | 0.017 | 0.008  | 0.017 |
| rs4790874   | 17 | 1995177   | T | C | 0.017 | 0.003 | 0.007  | 0.013 | -0.005 | 0.016 | 0.013  | 0.016 |
| rs11078713  | 17 | 7795972   | A | G | 0.015 | 0.003 | 0.003  | 0.013 | 0.011  | 0.017 | -0.001 | 0.016 |
| rs28441558  | 17 | 7803118   | T | C | 0.036 | 0.006 | 0.064  | 0.028 | 0.100  | 0.037 | 0.032  | 0.036 |
| rs11651955  | 17 | 16235462  | G | A | 0.014 | 0.003 | -0.001 | 0.013 | 0.006  | 0.016 | 0.001  | 0.016 |

Cigarettes per day

|             |    |           |   |   |       |       |        |       |        |       |        |       |
|-------------|----|-----------|---|---|-------|-------|--------|-------|--------|-------|--------|-------|
| rs67777803  | 17 | 27323322  | G | T | 0.025 | 0.003 | 0.014  | 0.017 | -0.006 | 0.021 | 0.021  | 0.021 |
| rs2344976   | 17 | 30685935  | T | C | 0.015 | 0.003 | 0.025  | 0.013 | 0.028  | 0.016 | 0.021  | 0.016 |
| rs3764351   | 17 | 37824339  | G | A | 0.015 | 0.003 | -0.066 | 0.013 | -0.075 | 0.017 | -0.051 | 0.017 |
| rs75919030  | 17 | 50193197  | T | C | 0.021 | 0.003 | -0.016 | 0.014 | -0.011 | 0.018 | -0.020 | 0.018 |
| rs2938134   | 17 | 50243397  | C | A | 0.018 | 0.003 | 0.000  | 0.013 | 0.022  | 0.017 | -0.014 | 0.017 |
| rs2587507   | 17 | 77790135  | T | C | 0.015 | 0.003 | -0.016 | 0.012 | -0.010 | 0.016 | -0.016 | 0.016 |
| rs34342129  | 18 | 5872472   | T | C | 0.014 | 0.003 | -0.003 | 0.012 | 0.006  | 0.016 | -0.015 | 0.016 |
| rs4476253   | 18 | 25253297  | G | A | 0.018 | 0.003 | 0.002  | 0.015 | 0.020  | 0.019 | -0.014 | 0.019 |
| rs7505855   | 18 | 31696075  | C | T | 0.017 | 0.003 | -0.006 | 0.013 | 0.003  | 0.016 | 0.003  | 0.016 |
| rs8096225   | 18 | 36921851  | C | A | 0.016 | 0.003 | -0.002 | 0.014 | 0.002  | 0.018 | -0.005 | 0.017 |
| rs67050670  | 18 | 39297254  | A | G | 0.020 | 0.003 | 0.007  | 0.015 | -0.008 | 0.019 | 0.011  | 0.019 |
| rs72898831  | 18 | 42658643  | A | G | 0.024 | 0.004 | 0.000  | 0.017 | -0.011 | 0.022 | 0.012  | 0.022 |
| rs8083764   | 18 | 49874515  | G | T | 0.016 | 0.003 | -0.016 | 0.013 | -0.023 | 0.017 | -0.014 | 0.017 |
| rs1373178   | 18 | 49967811  | T | G | 0.020 | 0.003 | -0.040 | 0.013 | -0.034 | 0.016 | -0.044 | 0.016 |
| rs72938304  | 18 | 53661743  | G | A | 0.027 | 0.004 | -0.005 | 0.020 | -0.003 | 0.026 | -0.006 | 0.025 |
| rs11872397  | 18 | 72535282  | G | A | 0.017 | 0.003 | 0.015  | 0.015 | 0.009  | 0.019 | 0.017  | 0.019 |
| rs71367544  | 18 | 77574374  | T | C | 0.021 | 0.003 | -0.041 | 0.016 | -0.052 | 0.020 | -0.025 | 0.020 |
| rs76608582  | 19 | 4474725   | C | A | 0.035 | 0.006 | -0.001 | 0.036 | 0.013  | 0.046 | -0.012 | 0.045 |
| rs10853981  | 19 | 4965064   | A | G | 0.015 | 0.003 | -0.010 | 0.013 | -0.009 | 0.017 | 0.000  | 0.017 |
| rs113230003 | 19 | 18460956  | G | A | 0.019 | 0.003 | 0.014  | 0.015 | 0.020  | 0.019 | 0.022  | 0.019 |
| rs8103660   | 19 | 18566395  | C | T | 0.016 | 0.003 | 0.032  | 0.013 | 0.066  | 0.017 | -0.001 | 0.017 |
| rs78081759  | 19 | 51130909  | A | G | 0.030 | 0.005 | 0.037  | 0.026 | 0.035  | 0.034 | 0.025  | 0.034 |
| rs1126757   | 19 | 55879872  | T | C | 0.014 | 0.003 | -0.007 | 0.013 | -0.014 | 0.017 | -0.005 | 0.017 |
| rs6050446   | 20 | 25195509  | G | A | 0.054 | 0.008 | 0.110  | 0.036 | 0.182  | 0.048 | 0.026  | 0.045 |
| rs6058782   | 20 | 29946968  | T | C | 0.030 | 0.004 | 0.069  | 0.022 | 0.074  | 0.028 | 0.053  | 0.028 |
| rs67696533  | 20 | 31173362  | A | G | 0.019 | 0.003 | 0.055  | 0.014 | 0.068  | 0.018 | 0.043  | 0.017 |
| rs6103271   | 20 | 42015848  | A | G | 0.019 | 0.003 | 0.004  | 0.016 | 0.028  | 0.021 | -0.012 | 0.021 |
| rs6011779   | 20 | 61984317  | C | T | 0.019 | 0.003 | 0.025  | 0.017 | 0.026  | 0.022 | 0.026  | 0.022 |
| rs3810496   | 20 | 62406886  | C | T | 0.016 | 0.003 | 0.055  | 0.013 | 0.061  | 0.017 | 0.046  | 0.017 |
| rs4818005   | 21 | 40588819  | G | A | 0.020 | 0.003 | 0.004  | 0.013 | 0.015  | 0.016 | -0.009 | 0.016 |
| rs139896    | 22 | 38397797  | C | T | 0.015 | 0.003 | -0.022 | 0.013 | 0.006  | 0.017 | -0.042 | 0.016 |
| rs4822102   | 22 | 42698430  | C | T | 0.017 | 0.003 | -0.024 | 0.013 | -0.022 | 0.017 | -0.024 | 0.016 |
| rs9627290   | 22 | 46443040  | T | C | 0.015 | 0.003 | 0.035  | 0.013 | 0.019  | 0.018 | 0.047  | 0.017 |
| rs11264100  | 1  | 35591626  | A | G | 0.022 | 0.004 | 0.003  | 0.020 | 0.008  | 0.026 | -0.001 | 0.025 |
| rs7599488   | 2  | 60718347  | T | C | 0.014 | 0.002 | 0.010  | 0.013 | -0.005 | 0.016 | 0.013  | 0.016 |
| rs78408772  | 2  | 62710608  | C | T | 0.022 | 0.004 | -0.011 | 0.021 | -0.008 | 0.027 | -0.020 | 0.026 |
| rs10204824  | 2  | 148372720 | A | G | 0.018 | 0.003 | 0.031  | 0.013 | 0.027  | 0.017 | 0.042  | 0.017 |
| rs2084533   | 3  | 16872929  | T | C | 0.016 | 0.003 | -0.002 | 0.013 | 0.015  | 0.017 | -0.030 | 0.017 |
| rs7431710   | 3  | 48935583  | G | A | 0.018 | 0.003 | 0.008  | 0.013 | 0.027  | 0.017 | -0.010 | 0.016 |
| rs2236951   | 3  | 50421081  | T | C | 0.017 | 0.003 | 0.043  | 0.016 | 0.057  | 0.020 | 0.037  | 0.020 |
| rs699165    | 3  | 136224697 | G | A | 0.016 | 0.003 | -0.012 | 0.014 | -0.018 | 0.018 | 0.000  | 0.018 |
| rs28813180  | 3  | 158083918 | G | A | 0.015 | 0.002 | -0.026 | 0.012 | -0.023 | 0.016 | -0.032 | 0.016 |
| rs11940255  | 4  | 67086288  | G | A | 0.017 | 0.003 | -0.012 | 0.014 | 0.010  | 0.018 | -0.029 | 0.018 |
| rs10454798  | 4  | 67980830  | T | G | 0.016 | 0.003 | 0.021  | 0.014 | 0.023  | 0.018 | 0.024  | 0.018 |
| rs7766641   | 6  | 26184102  | G | A | 0.017 | 0.003 | -0.012 | 0.014 | 0.020  | 0.018 | -0.031 | 0.018 |
| rs215600    | 7  | 32333642  | G | A | 0.024 | 0.003 | 0.014  | 0.013 | 0.008  | 0.017 | 0.006  | 0.016 |
| rs62447179  | 7  | 50339609  | G | A | 0.015 | 0.003 | 0.015  | 0.014 | 0.067  | 0.018 | -0.029 | 0.017 |
| rs2741351   | 8  | 27418040  | C | A | 0.018 | 0.003 | 0.024  | 0.017 | 0.015  | 0.021 | 0.026  | 0.021 |
| rs73229090  | 8  | 27442127  | A | C | 0.026 | 0.004 | 0.008  | 0.020 | -0.010 | 0.026 | 0.001  | 0.025 |
| rs13253502  | 8  | 42442018  | G | A | 0.014 | 0.002 | 0.048  | 0.013 | 0.066  | 0.017 | 0.031  | 0.016 |
| rs4236926   | 8  | 42578059  | G | T | 0.034 | 0.003 | 0.003  | 0.015 | 0.012  | 0.019 | -0.005 | 0.019 |

Body-mass index

|             |    |           |   |   |       |       |        |       |        |       |        |       |
|-------------|----|-----------|---|---|-------|-------|--------|-------|--------|-------|--------|-------|
| rs790564    | 8  | 64604218  | A | C | 0.018 | 0.003 | -0.014 | 0.014 | -0.011 | 0.018 | -0.006 | 0.018 |
| rs75596189  | 9  | 136468701 | T | C | 0.036 | 0.004 | -0.065 | 0.021 | -0.065 | 0.028 | -0.057 | 0.027 |
| rs3025383   | 9  | 136502369 | T | C | 0.031 | 0.003 | -0.026 | 0.016 | -0.035 | 0.021 | -0.010 | 0.021 |
| rs7951365   | 11 | 16377044  | C | T | 0.018 | 0.003 | 0.000  | 0.013 | 0.005  | 0.017 | -0.002 | 0.017 |
| rs10742683  | 11 | 43667625  | G | A | 0.013 | 0.002 | 0.000  | 0.013 | 0.007  | 0.016 | -0.012 | 0.016 |
| rs7125588   | 11 | 113436072 | A | G | 0.017 | 0.002 | 0.017  | 0.013 | 0.013  | 0.016 | 0.009  | 0.016 |
| rs11846838  | 14 | 104184737 | A | G | 0.015 | 0.003 | 0.007  | 0.013 | 0.017  | 0.017 | -0.005 | 0.017 |
| rs1115019   | 15 | 57141231  | T | C | 0.018 | 0.003 | -0.007 | 0.015 | 0.004  | 0.019 | -0.014 | 0.019 |
| rs632811    | 15 | 59155050  | A | G | 0.018 | 0.003 | -0.021 | 0.013 | -0.008 | 0.017 | -0.031 | 0.017 |
| rs10519203  | 15 | 78814046  | G | A | 0.094 | 0.003 | 0.001  | 0.013 | 0.004  | 0.017 | -0.009 | 0.017 |
| rs182317    | 15 | 89943601  | G | T | 0.016 | 0.003 | -0.014 | 0.013 | -0.025 | 0.017 | -0.006 | 0.017 |
| rs1592485   | 16 | 52093549  | C | A | 0.016 | 0.003 | 0.010  | 0.013 | -0.004 | 0.016 | 0.023  | 0.016 |
| rs12924872  | 16 | 69552215  | C | T | 0.013 | 0.002 | 0.031  | 0.013 | 0.025  | 0.016 | 0.035  | 0.016 |
| rs258321    | 16 | 89756473  | G | A | 0.016 | 0.002 | -0.001 | 0.013 | 0.001  | 0.016 | 0.001  | 0.016 |
| rs4144686   | 18 | 53251725  | G | A | 0.019 | 0.003 | 0.003  | 0.017 | 0.016  | 0.022 | -0.010 | 0.021 |
| rs4485470   | 18 | 62125063  | G | A | 0.015 | 0.002 | -0.014 | 0.013 | -0.016 | 0.017 | -0.004 | 0.016 |
| rs7351050   | 19 | 4044579   | G | A | 0.020 | 0.003 | -0.053 | 0.017 | -0.069 | 0.022 | -0.044 | 0.022 |
| rs145580088 | 19 | 41342842  | A | G | 0.086 | 0.008 | -0.082 | 0.048 | -0.075 | 0.063 | -0.069 | 0.061 |
| rs56113850  | 19 | 41353107  | C | T | 0.052 | 0.002 | 0.001  | 0.013 | -0.006 | 0.017 | 0.002  | 0.017 |
| rs8192726   | 19 | 41354496  | C | A | 0.039 | 0.005 | -0.005 | 0.029 | 0.015  | 0.037 | -0.011 | 0.036 |
| rs117824460 | 19 | 41371480  | A | G | 0.095 | 0.008 | -0.002 | 0.043 | -0.037 | 0.055 | 0.018  | 0.054 |
| rs6078373   | 20 | 11863500  | A | G | 0.016 | 0.002 | -0.021 | 0.013 | -0.019 | 0.016 | -0.022 | 0.016 |
| rs293534    | 20 | 31065490  | G | A | 0.017 | 0.002 | 0.056  | 0.013 | 0.056  | 0.016 | 0.052  | 0.016 |
| rs2273500   | 20 | 61986949  | C | T | 0.036 | 0.003 | 0.026  | 0.020 | 0.035  | 0.025 | 0.011  | 0.025 |
| rs7281463   | 21 | 40520783  | C | A | 0.014 | 0.002 | -0.001 | 0.013 | 0.009  | 0.016 | -0.012 | 0.016 |
| rs12044597  | 1  | 1708801   | G | A | 0.014 | 0.002 | -0.063 | 0.013 | -0.055 | 0.016 | -0.064 | 0.016 |
| rs7535528   | 1  | 2444414   | G | A | 0.015 | 0.002 | -0.043 | 0.013 | 0.003  | 0.017 | -0.081 | 0.017 |
| rs2235564   | 1  | 6713114   | T | C | 0.013 | 0.002 | -0.015 | 0.013 | -0.017 | 0.017 | -0.015 | 0.017 |
| rs1891215   | 1  | 7727854   | C | T | 0.012 | 0.002 | -0.023 | 0.013 | -0.029 | 0.016 | -0.019 | 0.016 |
| rs11121210  | 1  | 8708529   | C | T | 0.011 | 0.002 | -0.012 | 0.013 | 0.019  | 0.017 | -0.034 | 0.016 |
| rs10779751  | 1  | 11284336  | A | G | 0.014 | 0.002 | -0.025 | 0.014 | -0.052 | 0.018 | -0.002 | 0.018 |
| rs761423    | 1  | 17301672  | T | C | 0.011 | 0.002 | -0.004 | 0.013 | 0.015  | 0.016 | -0.020 | 0.016 |
| rs3845520   | 1  | 23301943  | C | T | 0.019 | 0.002 | 0.014  | 0.016 | 0.018  | 0.021 | 0.013  | 0.021 |
| rs3818788   | 1  | 32158374  | C | T | 0.013 | 0.002 | -0.012 | 0.013 | -0.008 | 0.017 | -0.019 | 0.017 |
| rs12022461  | 1  | 33232525  | G | A | 0.016 | 0.002 | 0.019  | 0.016 | -0.005 | 0.021 | 0.040  | 0.021 |
| rs4653017   | 1  | 33776728  | T | C | 0.012 | 0.002 | 0.041  | 0.013 | 0.024  | 0.017 | 0.056  | 0.017 |
| rs9426003   | 1  | 34602870  | G | A | 0.012 | 0.002 | 0.022  | 0.014 | 0.009  | 0.018 | 0.031  | 0.018 |
| rs11577094  | 1  | 38026600  | T | C | 0.018 | 0.003 | 0.031  | 0.023 | 0.059  | 0.030 | 0.004  | 0.029 |
| rs2282231   | 1  | 39569571  | T | C | 0.017 | 0.002 | 0.010  | 0.015 | 0.040  | 0.020 | -0.022 | 0.020 |
| rs11206436  | 1  | 40078447  | T | C | 0.017 | 0.003 | 0.021  | 0.020 | 0.021  | 0.026 | 0.018  | 0.026 |
| rs946526    | 1  | 46487168  | C | T | 0.031 | 0.004 | -0.049 | 0.032 | -0.042 | 0.042 | -0.046 | 0.041 |
| rs657452    | 1  | 49589847  | A | G | 0.019 | 0.002 | -0.050 | 0.013 | -0.059 | 0.016 | -0.039 | 0.016 |
| rs7530169   | 1  | 50168591  | T | C | 0.019 | 0.002 | -0.049 | 0.013 | -0.043 | 0.017 | -0.054 | 0.017 |
| rs4926853   | 1  | 50709222  | A | G | 0.012 | 0.002 | -0.036 | 0.014 | -0.038 | 0.018 | -0.034 | 0.017 |
| rs3766430   | 1  | 54730651  | C | T | 0.011 | 0.002 | -0.003 | 0.013 | -0.003 | 0.016 | -0.001 | 0.016 |
| rs17424278  | 1  | 57846394  | C | A | 0.017 | 0.003 | -0.032 | 0.020 | -0.030 | 0.026 | -0.028 | 0.026 |
| rs2481665   | 1  | 62594677  | T | C | 0.016 | 0.002 | -0.006 | 0.013 | 0.011  | 0.016 | -0.017 | 0.016 |
| rs10889550  | 1  | 65906067  | G | A | 0.024 | 0.004 | -0.037 | 0.031 | -0.024 | 0.040 | -0.052 | 0.040 |
| rs7519259   | 1  | 66434743  | A | G | 0.013 | 0.002 | -0.008 | 0.012 | -0.016 | 0.016 | 0.001  | 0.016 |
| rs1993709   | 1  | 72838529  | G | A | 0.033 | 0.002 | 0.018  | 0.016 | 0.011  | 0.021 | 0.009  | 0.020 |
| rs7551507   | 1  | 74995225  | C | T | 0.018 | 0.002 | -0.007 | 0.013 | 0.001  | 0.016 | -0.006 | 0.016 |



|            |   |           |   |   |       |       |        |       |        |       |        |       |
|------------|---|-----------|---|---|-------|-------|--------|-------|--------|-------|--------|-------|
| rs12049202 | 1 | 77967523  | T | C | 0.024 | 0.002 | -0.037 | 0.016 | -0.062 | 0.020 | -0.003 | 0.020 |
| rs17391694 | 1 | 78623626  | T | C | 0.032 | 0.003 | -0.066 | 0.019 | -0.114 | 0.026 | -0.016 | 0.024 |
| rs12065553 | 1 | 80793118  | G | A | 0.012 | 0.002 | 0.012  | 0.014 | 0.026  | 0.018 | 0.011  | 0.017 |
| rs284227   | 1 | 82379446  | C | T | 0.015 | 0.002 | -0.001 | 0.015 | 0.008  | 0.019 | -0.011 | 0.019 |
| rs6690764  | 1 | 92976590  | G | A | 0.015 | 0.002 | 0.025  | 0.015 | 0.009  | 0.020 | 0.037  | 0.020 |
| rs1361739  | 1 | 96289734  | G | A | 0.018 | 0.002 | -0.018 | 0.013 | -0.021 | 0.017 | -0.020 | 0.017 |
| rs11165643 | 1 | 96924097  | T | C | 0.021 | 0.002 | -0.009 | 0.013 | -0.019 | 0.016 | -0.006 | 0.016 |
| rs995258   | 1 | 97431052  | A | C | 0.014 | 0.002 | -0.011 | 0.013 | -0.005 | 0.016 | -0.020 | 0.016 |
| rs4523552  | 1 | 98328093  | T | C | 0.014 | 0.002 | 0.000  | 0.015 | 0.010  | 0.020 | -0.013 | 0.019 |
| rs1730859  | 1 | 107617707 | G | A | 0.012 | 0.002 | -0.047 | 0.013 | -0.028 | 0.017 | -0.055 | 0.017 |
| rs17531363 | 1 | 107977075 | A | C | 0.013 | 0.002 | -0.022 | 0.014 | -0.037 | 0.018 | 0.004  | 0.017 |
| rs7550711  | 1 | 110082886 | T | C | 0.065 | 0.005 | -0.054 | 0.039 | -0.048 | 0.050 | -0.060 | 0.049 |
| rs12033257 | 1 | 112318484 | A | G | 0.015 | 0.002 | -0.002 | 0.014 | -0.006 | 0.017 | 0.003  | 0.018 |
| rs2007231  | 1 | 115266306 | C | T | 0.010 | 0.002 | 0.011  | 0.013 | -0.012 | 0.017 | 0.023  | 0.017 |
| rs7534091  | 1 | 118864616 | G | A | 0.011 | 0.002 | 0.015  | 0.014 | 0.017  | 0.018 | 0.019  | 0.018 |
| rs10923724 | 1 | 119546842 | C | T | 0.012 | 0.002 | 0.013  | 0.013 | 0.007  | 0.016 | 0.023  | 0.016 |
| rs6587552  | 1 | 151018861 | A | G | 0.017 | 0.002 | 0.022  | 0.015 | 0.027  | 0.019 | 0.012  | 0.019 |
| rs905938   | 1 | 154991389 | C | T | 0.015 | 0.002 | 0.037  | 0.014 | 0.036  | 0.019 | 0.037  | 0.018 |
| rs6695119  | 1 | 155739430 | T | C | 0.041 | 0.006 | 0.005  | 0.045 | 0.038  | 0.059 | -0.010 | 0.057 |
| rs4414033  | 1 | 156406853 | A | G | 0.013 | 0.002 | -0.010 | 0.013 | -0.014 | 0.017 | -0.010 | 0.017 |
| rs10733051 | 1 | 167280354 | A | G | 0.010 | 0.002 | 0.011  | 0.012 | 0.009  | 0.016 | 0.006  | 0.016 |
| rs16864515 | 1 | 171435542 | A | C | 0.019 | 0.003 | -0.024 | 0.021 | -0.050 | 0.027 | -0.001 | 0.027 |
| rs13375205 | 1 | 173947191 | A | G | 0.019 | 0.003 | 0.000  | 0.019 | 0.004  | 0.025 | -0.005 | 0.024 |
| rs12564992 | 1 | 174478100 | G | A | 0.020 | 0.003 | -0.002 | 0.019 | 0.009  | 0.025 | -0.009 | 0.025 |
| rs6691857  | 1 | 174885129 | C | T | 0.035 | 0.005 | 0.011  | 0.036 | -0.008 | 0.046 | 0.016  | 0.046 |
| rs11581304 | 1 | 177383443 | C | T | 0.018 | 0.003 | 0.014  | 0.021 | -0.017 | 0.027 | 0.045  | 0.027 |
| rs543874   | 1 | 177889480 | G | A | 0.048 | 0.002 | -0.027 | 0.016 | -0.004 | 0.020 | -0.045 | 0.020 |
| rs10920678 | 1 | 190239907 | A | G | 0.016 | 0.002 | -0.002 | 0.013 | 0.003  | 0.016 | 0.006  | 0.016 |
| rs645482   | 1 | 191386639 | A | G | 0.011 | 0.002 | -0.019 | 0.014 | -0.009 | 0.017 | -0.022 | 0.017 |
| rs12041258 | 1 | 195047936 | T | C | 0.015 | 0.002 | 0.007  | 0.015 | 0.014  | 0.019 | 0.007  | 0.019 |
| rs6676084  | 1 | 197094030 | C | T | 0.012 | 0.002 | 0.028  | 0.013 | 0.005  | 0.017 | 0.041  | 0.017 |
| rs2820311  | 1 | 201841476 | G | A | 0.024 | 0.002 | 0.023  | 0.013 | 0.020  | 0.017 | 0.027  | 0.017 |
| rs9077     | 1 | 202116238 | G | A | 0.014 | 0.002 | -0.006 | 0.014 | -0.011 | 0.017 | -0.005 | 0.017 |
| rs823074   | 1 | 205774839 | T | C | 0.011 | 0.002 | -0.035 | 0.013 | -0.028 | 0.016 | -0.049 | 0.016 |
| rs17014375 | 1 | 209543560 | G | T | 0.017 | 0.003 | -0.005 | 0.018 | -0.012 | 0.024 | 0.000  | 0.023 |
| rs6661316  | 1 | 210095527 | T | C | 0.011 | 0.002 | 0.000  | 0.013 | 0.012  | 0.016 | -0.013 | 0.016 |
| rs11118308 | 1 | 219633869 | A | G | 0.010 | 0.002 | 0.019  | 0.013 | 0.019  | 0.016 | 0.022  | 0.016 |
| rs10915840 | 1 | 225668524 | G | A | 0.012 | 0.002 | 0.015  | 0.014 | 0.034  | 0.018 | 0.009  | 0.018 |
| rs2491864  | 1 | 242986063 | A | G | 0.014 | 0.002 | -0.015 | 0.015 | 0.000  | 0.019 | -0.029 | 0.019 |
| rs946824   | 1 | 243684019 | T | C | 0.021 | 0.003 | -0.027 | 0.018 | -0.033 | 0.024 | -0.016 | 0.023 |
| rs13021737 | 2 | 632348    | G | A | 0.057 | 0.002 | -0.018 | 0.016 | -0.004 | 0.021 | -0.027 | 0.021 |
| rs10929925 | 2 | 6155557   | C | A | 0.014 | 0.002 | 0.027  | 0.013 | 0.022  | 0.016 | 0.026  | 0.016 |
| rs10182181 | 2 | 25150296  | G | A | 0.033 | 0.002 | 0.081  | 0.012 | 0.107  | 0.016 | 0.057  | 0.016 |
| rs12468863 | 2 | 26940294  | C | T | 0.015 | 0.002 | 0.006  | 0.012 | -0.013 | 0.016 | 0.022  | 0.016 |
| rs7567655  | 2 | 28273595  | G | A | 0.027 | 0.005 | 0.053  | 0.034 | 0.030  | 0.043 | 0.080  | 0.043 |
| rs4372836  | 2 | 28973883  | T | C | 0.014 | 0.002 | -0.018 | 0.013 | -0.017 | 0.017 | -0.010 | 0.017 |
| rs17327461 | 2 | 35512183  | T | C | 0.013 | 0.002 | -0.006 | 0.012 | -0.006 | 0.016 | -0.011 | 0.016 |
| rs17019087 | 2 | 36783599  | C | T | 0.011 | 0.002 | -0.001 | 0.013 | 0.006  | 0.017 | 0.003  | 0.016 |
| rs4670627  | 2 | 37046711  | T | C | 0.011 | 0.002 | 0.008  | 0.013 | 0.003  | 0.017 | 0.011  | 0.016 |
| rs6741690  | 2 | 40291593  | A | G | 0.012 | 0.002 | -0.002 | 0.014 | 0.006  | 0.018 | -0.007 | 0.018 |
| rs2063177  | 2 | 41712849  | A | G | 0.012 | 0.002 | 0.029  | 0.013 | 0.034  | 0.017 | 0.030  | 0.016 |

|            |   |           |   |   |       |       |        |       |        |       |        |       |
|------------|---|-----------|---|---|-------|-------|--------|-------|--------|-------|--------|-------|
| rs4953577  | 2 | 42935961  | T | C | 0.010 | 0.002 | 0.000  | 0.012 | 0.018  | 0.016 | -0.007 | 0.016 |
| rs13425435 | 2 | 44776597  | A | C | 0.012 | 0.002 | -0.027 | 0.013 | -0.016 | 0.017 | -0.028 | 0.017 |
| rs13012099 | 2 | 47010742  | G | A | 0.014 | 0.002 | -0.005 | 0.013 | 0.012  | 0.017 | -0.014 | 0.017 |
| rs7561278  | 2 | 48954905  | T | C | 0.016 | 0.002 | 0.001  | 0.015 | -0.007 | 0.020 | 0.005  | 0.019 |
| rs930295   | 2 | 50233352  | A | C | 0.021 | 0.002 | -0.012 | 0.017 | -0.003 | 0.022 | -0.030 | 0.021 |
| rs13406839 | 2 | 50735433  | A | G | 0.013 | 0.002 | 0.003  | 0.013 | -0.004 | 0.016 | 0.001  | 0.016 |
| rs3806572  | 2 | 55238677  | G | A | 0.015 | 0.002 | 0.009  | 0.014 | 0.043  | 0.018 | -0.016 | 0.018 |
| rs13432055 | 2 | 56603985  | C | T | 0.012 | 0.002 | 0.019  | 0.014 | 0.014  | 0.018 | 0.029  | 0.018 |
| rs1345942  | 2 | 57335044  | C | T | 0.010 | 0.002 | 0.012  | 0.013 | 0.017  | 0.017 | 0.008  | 0.016 |
| rs1106090  | 2 | 58068741  | G | A | 0.013 | 0.002 | -0.021 | 0.013 | -0.011 | 0.016 | -0.028 | 0.016 |
| rs4671328  | 2 | 58935282  | T | G | 0.022 | 0.002 | 0.002  | 0.013 | 0.019  | 0.016 | -0.007 | 0.016 |
| rs12053103 | 2 | 59540594  | A | G | 0.012 | 0.002 | -0.008 | 0.013 | -0.014 | 0.016 | -0.003 | 0.016 |
| rs12476772 | 2 | 60203917  | A | C | 0.012 | 0.002 | -0.033 | 0.013 | -0.039 | 0.017 | -0.040 | 0.017 |
| rs2195086  | 2 | 60814466  | G | T | 0.013 | 0.002 | -0.020 | 0.018 | -0.034 | 0.023 | -0.003 | 0.022 |
| rs13417156 | 2 | 62848319  | C | T | 0.014 | 0.002 | 0.005  | 0.013 | 0.007  | 0.017 | 0.002  | 0.016 |
| rs12477088 | 2 | 67841326  | T | C | 0.015 | 0.002 | 0.026  | 0.013 | 0.009  | 0.016 | 0.053  | 0.016 |
| rs7607351  | 2 | 69562127  | T | C | 0.012 | 0.002 | -0.008 | 0.013 | -0.012 | 0.016 | -0.013 | 0.016 |
| rs934515   | 2 | 79482643  | A | G | 0.019 | 0.003 | 0.004  | 0.019 | 0.016  | 0.025 | -0.009 | 0.025 |
| rs1371108  | 2 | 81816251  | A | C | 0.012 | 0.002 | 0.002  | 0.013 | 0.014  | 0.017 | -0.012 | 0.017 |
| rs7557796  | 2 | 86766153  | T | C | 0.016 | 0.002 | -0.001 | 0.013 | 0.009  | 0.017 | -0.009 | 0.017 |
| rs4556997  | 2 | 100814858 | A | C | 0.020 | 0.002 | -0.035 | 0.018 | -0.008 | 0.023 | -0.074 | 0.023 |
| rs6707445  | 2 | 104420858 | A | G | 0.013 | 0.002 | 0.006  | 0.013 | 0.000  | 0.016 | 0.014  | 0.016 |
| rs10197031 | 2 | 105454590 | C | T | 0.017 | 0.002 | -0.011 | 0.014 | -0.006 | 0.018 | -0.011 | 0.018 |
| rs731834   | 2 | 113957198 | A | C | 0.011 | 0.002 | -0.046 | 0.012 | -0.058 | 0.016 | -0.030 | 0.016 |
| rs4954638  | 2 | 137435455 | A | C | 0.012 | 0.002 | -0.011 | 0.014 | -0.016 | 0.018 | -0.001 | 0.018 |
| rs17551974 | 2 | 142293146 | C | A | 0.014 | 0.002 | 0.001  | 0.016 | 0.028  | 0.021 | -0.029 | 0.020 |
| rs2890652  | 2 | 142959931 | C | T | 0.017 | 0.002 | 0.024  | 0.017 | 0.010  | 0.022 | 0.018  | 0.022 |
| rs6710871  | 2 | 143960593 | A | G | 0.018 | 0.002 | 0.005  | 0.018 | -0.046 | 0.023 | 0.047  | 0.023 |
| rs7560871  | 2 | 145616899 | A | G | 0.022 | 0.003 | -0.108 | 0.024 | -0.117 | 0.032 | -0.100 | 0.031 |
| rs429343   | 2 | 147903382 | A | G | 0.015 | 0.002 | 0.021  | 0.013 | 0.016  | 0.016 | 0.032  | 0.016 |
| rs2652432  | 2 | 155734955 | G | T | 0.013 | 0.002 | -0.021 | 0.016 | -0.027 | 0.021 | -0.023 | 0.021 |
| rs16839578 | 2 | 156629693 | C | T | 0.011 | 0.002 | -0.013 | 0.013 | -0.023 | 0.017 | -0.006 | 0.017 |
| rs10198345 | 2 | 157109395 | C | T | 0.011 | 0.002 | 0.002  | 0.013 | 0.005  | 0.017 | 0.011  | 0.017 |
| rs3764835  | 2 | 159519368 | G | A | 0.014 | 0.002 | -0.023 | 0.017 | -0.015 | 0.022 | -0.015 | 0.022 |
| rs12692596 | 2 | 161265910 | T | C | 0.011 | 0.002 | -0.034 | 0.013 | -0.020 | 0.017 | -0.039 | 0.016 |
| rs10192119 | 2 | 164581241 | G | T | 0.017 | 0.002 | 0.001  | 0.017 | -0.012 | 0.022 | 0.013  | 0.021 |
| rs11677541 | 2 | 165429235 | G | A | 0.012 | 0.002 | -0.017 | 0.012 | -0.010 | 0.016 | -0.025 | 0.016 |
| rs3769948  | 2 | 166186923 | A | G | 0.013 | 0.002 | -0.022 | 0.014 | -0.020 | 0.019 | -0.025 | 0.018 |
| rs535533   | 2 | 166959505 | C | T | 0.010 | 0.002 | 0.008  | 0.013 | 0.007  | 0.016 | 0.004  | 0.016 |
| rs6738445  | 2 | 172599615 | C | T | 0.013 | 0.002 | -0.010 | 0.014 | -0.007 | 0.018 | -0.020 | 0.018 |
| rs7573263  | 2 | 174980833 | T | C | 0.014 | 0.002 | -0.010 | 0.013 | -0.007 | 0.016 | -0.013 | 0.016 |
| rs1528435  | 2 | 181550962 | T | C | 0.016 | 0.002 | 0.008  | 0.013 | 0.014  | 0.017 | -0.001 | 0.016 |
| rs2029085  | 2 | 187207393 | G | A | 0.016 | 0.003 | -0.031 | 0.020 | -0.034 | 0.026 | -0.023 | 0.026 |
| rs10497810 | 2 | 198895732 | C | T | 0.017 | 0.002 | 0.026  | 0.016 | -0.025 | 0.020 | 0.066  | 0.021 |
| rs4482463  | 2 | 205375909 | C | A | 0.033 | 0.003 | 0.010  | 0.023 | 0.004  | 0.030 | 0.006  | 0.029 |
| rs6435277  | 2 | 206087701 | G | A | 0.011 | 0.002 | 0.012  | 0.013 | 0.015  | 0.016 | 0.004  | 0.016 |
| rs12989476 | 2 | 207197155 | T | C | 0.013 | 0.002 | 0.012  | 0.013 | 0.027  | 0.017 | -0.006 | 0.017 |
| rs1263618  | 2 | 207956108 | C | T | 0.012 | 0.002 | 0.006  | 0.013 | 0.007  | 0.017 | 0.000  | 0.017 |
| rs17203016 | 2 | 208255518 | G | A | 0.015 | 0.002 | 0.008  | 0.016 | -0.018 | 0.021 | 0.014  | 0.020 |
| rs4673553  | 2 | 211608379 | G | T | 0.014 | 0.002 | -0.018 | 0.012 | -0.027 | 0.016 | -0.016 | 0.016 |
| rs7421089  | 2 | 211988412 | T | C | 0.014 | 0.002 | -0.022 | 0.014 | -0.019 | 0.018 | -0.031 | 0.017 |

|            |   |           |   |   |       |       |        |       |        |       |        |       |
|------------|---|-----------|---|---|-------|-------|--------|-------|--------|-------|--------|-------|
| rs16846136 | 2 | 212291371 | A | C | 0.013 | 0.002 | 0.034  | 0.014 | 0.015  | 0.018 | 0.048  | 0.018 |
| rs7599312  | 2 | 213413231 | G | A | 0.019 | 0.002 | -0.022 | 0.014 | -0.018 | 0.018 | -0.017 | 0.018 |
| rs7607369  | 2 | 219279097 | A | G | 0.012 | 0.002 | 0.011  | 0.013 | 0.030  | 0.016 | -0.008 | 0.016 |
| rs11889536 | 2 | 220163543 | A | G | 0.019 | 0.002 | 0.010  | 0.017 | -0.012 | 0.022 | 0.023  | 0.022 |
| rs4500930  | 2 | 228985505 | T | C | 0.016 | 0.002 | -0.016 | 0.013 | 0.001  | 0.017 | -0.029 | 0.017 |
| rs2162524  | 2 | 230817437 | C | T | 0.016 | 0.002 | -0.012 | 0.013 | -0.009 | 0.017 | -0.012 | 0.017 |
| rs4663629  | 2 | 236801872 | A | G | 0.013 | 0.002 | 0.001  | 0.015 | 0.004  | 0.019 | 0.003  | 0.019 |
| rs7652415  | 3 | 9505238   | T | C | 0.016 | 0.003 | 0.022  | 0.018 | 0.022  | 0.023 | 0.025  | 0.023 |
| rs17776719 | 3 | 11640481  | G | A | 0.017 | 0.003 | -0.029 | 0.017 | -0.083 | 0.023 | 0.010  | 0.022 |
| rs10510419 | 3 | 12426936  | G | T | 0.018 | 0.002 | 0.026  | 0.018 | 0.014  | 0.023 | 0.042  | 0.022 |
| rs2600226  | 3 | 12928762  | C | T | 0.012 | 0.002 | 0.001  | 0.013 | -0.005 | 0.017 | -0.004 | 0.017 |
| rs9845966  | 3 | 13433158  | T | G | 0.011 | 0.002 | 0.005  | 0.012 | -0.009 | 0.016 | 0.014  | 0.016 |
| rs11128760 | 3 | 15873407  | A | G | 0.011 | 0.002 | -0.010 | 0.013 | -0.015 | 0.016 | -0.001 | 0.016 |
| rs4858193  | 3 | 20441050  | T | C | 0.013 | 0.002 | 0.009  | 0.014 | 0.021  | 0.018 | 0.010  | 0.018 |
| rs6804842  | 3 | 25106437  | G | A | 0.016 | 0.002 | 0.003  | 0.013 | 0.008  | 0.016 | -0.004 | 0.016 |
| rs11921432 | 3 | 35117776  | C | T | 0.018 | 0.003 | 0.005  | 0.020 | -0.026 | 0.026 | 0.032  | 0.025 |
| rs11129662 | 3 | 35696096  | G | A | 0.012 | 0.002 | 0.019  | 0.013 | 0.027  | 0.017 | 0.010  | 0.017 |
| rs13072731 | 3 | 38533335  | C | A | 0.011 | 0.002 | -0.008 | 0.013 | -0.016 | 0.016 | -0.003 | 0.016 |
| rs9814633  | 3 | 41310470  | A | G | 0.012 | 0.002 | 0.008  | 0.013 | 0.011  | 0.017 | 0.004  | 0.017 |
| rs33485    | 3 | 42417982  | C | T | 0.016 | 0.002 | 0.005  | 0.014 | -0.002 | 0.019 | 0.007  | 0.018 |
| rs3852012  | 3 | 44045981  | G | A | 0.013 | 0.002 | 0.000  | 0.013 | 0.016  | 0.017 | -0.018 | 0.017 |
| rs4683096  | 3 | 45374496  | T | G | 0.012 | 0.002 | -0.018 | 0.012 | -0.008 | 0.016 | -0.031 | 0.016 |
| rs11716779 | 3 | 47606215  | G | A | 0.013 | 0.002 | -0.003 | 0.014 | -0.005 | 0.018 | -0.001 | 0.018 |
| rs11710798 | 3 | 48570686  | A | C | 0.017 | 0.003 | -0.099 | 0.021 | -0.113 | 0.026 | -0.084 | 0.026 |
| rs1800668  | 3 | 49395757  | G | A | 0.014 | 0.002 | -0.152 | 0.013 | -0.166 | 0.017 | -0.141 | 0.017 |
| rs11713193 | 3 | 49924424  | A | G | 0.024 | 0.002 | -0.079 | 0.012 | -0.080 | 0.016 | -0.086 | 0.016 |
| rs1034405  | 3 | 50597092  | A | G | 0.016 | 0.003 | 0.009  | 0.019 | -0.001 | 0.024 | 0.028  | 0.024 |
| rs6787805  | 3 | 51204788  | G | A | 0.017 | 0.002 | 0.008  | 0.019 | 0.017  | 0.024 | 0.006  | 0.024 |
| rs13090011 | 3 | 51728573  | A | G | 0.015 | 0.002 | 0.014  | 0.017 | 0.003  | 0.022 | 0.027  | 0.021 |
| rs353547   | 3 | 52268866  | T | C | 0.012 | 0.002 | -0.017 | 0.013 | -0.024 | 0.017 | -0.011 | 0.016 |
| rs2710323  | 3 | 52815905  | C | T | 0.014 | 0.002 | -0.014 | 0.012 | -0.005 | 0.016 | -0.016 | 0.016 |
| rs2680648  | 3 | 53777176  | T | C | 0.016 | 0.002 | 0.030  | 0.015 | 0.013  | 0.019 | 0.048  | 0.019 |
| rs12488237 | 3 | 56114861  | C | T | 0.024 | 0.004 | -0.042 | 0.028 | -0.038 | 0.036 | -0.030 | 0.035 |
| rs2365389  | 3 | 61236462  | C | T | 0.017 | 0.002 | -0.009 | 0.013 | -0.016 | 0.016 | -0.003 | 0.016 |
| rs1911746  | 3 | 62100840  | T | C | 0.012 | 0.002 | 0.009  | 0.015 | 0.002  | 0.019 | 0.021  | 0.019 |
| rs1452075  | 3 | 62481063  | T | C | 0.014 | 0.002 | -0.014 | 0.014 | -0.001 | 0.018 | -0.027 | 0.018 |
| rs17831815 | 3 | 66437086  | C | T | 0.011 | 0.002 | 0.005  | 0.013 | 0.016  | 0.017 | -0.004 | 0.017 |
| rs11915371 | 3 | 70539559  | C | A | 0.015 | 0.002 | 0.007  | 0.015 | 0.032  | 0.020 | -0.028 | 0.019 |
| rs1523768  | 3 | 77667044  | G | A | 0.011 | 0.002 | 0.014  | 0.013 | 0.016  | 0.017 | 0.010  | 0.017 |
| rs6419734  | 3 | 78458928  | T | C | 0.017 | 0.003 | -0.009 | 0.017 | 0.011  | 0.023 | -0.022 | 0.022 |
| rs328049   | 3 | 78985805  | A | G | 0.010 | 0.002 | 0.019  | 0.013 | 0.028  | 0.016 | 0.011  | 0.016 |
| rs6781254  | 3 | 80649139  | T | C | 0.011 | 0.002 | -0.006 | 0.014 | -0.017 | 0.018 | -0.007 | 0.017 |
| rs3849570  | 3 | 81792112  | A | C | 0.013 | 0.002 | 0.004  | 0.013 | -0.015 | 0.017 | 0.022  | 0.017 |
| rs716764   | 3 | 82646519  | T | C | 0.018 | 0.002 | 0.002  | 0.017 | -0.001 | 0.022 | -0.011 | 0.021 |
| rs9827823  | 3 | 84221774  | T | C | 0.019 | 0.002 | 0.008  | 0.017 | 0.007  | 0.022 | 0.015  | 0.022 |
| rs7628129  | 3 | 85095897  | C | T | 0.015 | 0.002 | -0.022 | 0.012 | -0.014 | 0.016 | -0.036 | 0.016 |
| rs2122042  | 3 | 85866335  | T | G | 0.024 | 0.002 | -0.062 | 0.015 | -0.050 | 0.019 | -0.078 | 0.019 |
| rs1006896  | 3 | 88104411  | A | C | 0.023 | 0.003 | 0.005  | 0.020 | -0.025 | 0.026 | 0.023  | 0.025 |
| rs13072412 | 3 | 88749998  | C | A | 0.011 | 0.002 | 0.012  | 0.012 | 0.017  | 0.016 | 0.002  | 0.016 |
| rs4857329  | 3 | 94036952  | A | G | 0.020 | 0.002 | 0.015  | 0.012 | 0.023  | 0.016 | 0.001  | 0.016 |
| rs1436343  | 3 | 104606130 | G | A | 0.014 | 0.002 | -0.001 | 0.013 | 0.001  | 0.016 | -0.002 | 0.016 |

|            |   |           |   |   |       |       |        |       |        |       |        |       |
|------------|---|-----------|---|---|-------|-------|--------|-------|--------|-------|--------|-------|
| rs13317489 | 3 | 107280241 | A | G | 0.013 | 0.002 | -0.036 | 0.016 | -0.064 | 0.021 | -0.012 | 0.021 |
| rs7640424  | 3 | 107820063 | C | T | 0.014 | 0.002 | 0.020  | 0.014 | 0.015  | 0.018 | 0.031  | 0.017 |
| rs13085471 | 3 | 108359880 | T | C | 0.011 | 0.002 | -0.027 | 0.013 | -0.021 | 0.016 | -0.029 | 0.016 |
| rs17619973 | 3 | 114417675 | A | G | 0.020 | 0.003 | 0.018  | 0.024 | 0.023  | 0.031 | 0.017  | 0.031 |
| rs2903971  | 3 | 116935744 | T | G | 0.015 | 0.002 | -0.015 | 0.016 | -0.023 | 0.021 | -0.009 | 0.020 |
| rs779206   | 3 | 118023515 | G | A | 0.013 | 0.002 | 0.006  | 0.014 | 0.028  | 0.018 | -0.013 | 0.018 |
| rs12629015 | 3 | 119618053 | A | G | 0.014 | 0.002 | 0.011  | 0.016 | -0.008 | 0.021 | 0.019  | 0.021 |
| rs10668    | 3 | 123211064 | G | T | 0.013 | 0.002 | -0.015 | 0.014 | -0.005 | 0.018 | -0.022 | 0.017 |
| rs2270778  | 3 | 124692689 | C | T | 0.010 | 0.002 | 0.034  | 0.013 | 0.036  | 0.017 | 0.032  | 0.016 |
| rs9848399  | 3 | 125205106 | A | G | 0.016 | 0.003 | 0.000  | 0.019 | 0.011  | 0.025 | -0.016 | 0.024 |
| rs1320903  | 3 | 131758077 | A | G | 0.022 | 0.002 | -0.006 | 0.013 | 0.013  | 0.017 | -0.015 | 0.017 |
| rs10935143 | 3 | 134665159 | G | A | 0.011 | 0.002 | -0.004 | 0.012 | -0.006 | 0.016 | -0.010 | 0.016 |
| rs13079205 | 3 | 135800693 | G | A | 0.015 | 0.002 | -0.021 | 0.014 | -0.016 | 0.018 | -0.027 | 0.018 |
| rs12630999 | 3 | 136300927 | A | G | 0.018 | 0.002 | -0.015 | 0.014 | -0.018 | 0.018 | -0.004 | 0.018 |
| rs1199334  | 3 | 138091140 | A | G | 0.014 | 0.002 | -0.019 | 0.016 | -0.008 | 0.020 | -0.024 | 0.020 |
| rs16851483 | 3 | 141275436 | T | G | 0.037 | 0.004 | 0.009  | 0.025 | -0.002 | 0.032 | 0.023  | 0.032 |
| rs171390   | 3 | 154038412 | C | T | 0.015 | 0.002 | -0.004 | 0.013 | 0.010  | 0.016 | -0.013 | 0.016 |
| rs6441080  | 3 | 156298935 | A | G | 0.015 | 0.002 | -0.009 | 0.017 | -0.014 | 0.022 | 0.003  | 0.022 |
| rs13081038 | 3 | 156950732 | G | A | 0.012 | 0.002 | 0.006  | 0.013 | 0.002  | 0.017 | 0.011  | 0.017 |
| rs827092   | 3 | 157985182 | T | C | 0.013 | 0.002 | 0.023  | 0.013 | 0.023  | 0.016 | 0.025  | 0.016 |
| rs1476322  | 3 | 161446055 | A | G | 0.010 | 0.002 | -0.004 | 0.012 | -0.015 | 0.016 | 0.009  | 0.016 |
| rs8192675  | 3 | 170724883 | C | T | 0.015 | 0.002 | -0.009 | 0.014 | -0.009 | 0.018 | -0.011 | 0.017 |
| rs488029   | 3 | 173119378 | A | G | 0.015 | 0.002 | 0.001  | 0.013 | 0.005  | 0.016 | -0.008 | 0.016 |
| rs9844274  | 3 | 173666966 | C | T | 0.010 | 0.002 | 0.009  | 0.014 | 0.008  | 0.018 | 0.010  | 0.018 |
| rs3860517  | 3 | 180804471 | A | G | 0.011 | 0.002 | -0.027 | 0.013 | -0.010 | 0.017 | -0.034 | 0.017 |
| rs6443750  | 3 | 181329682 | C | T | 0.015 | 0.002 | 0.031  | 0.018 | 0.032  | 0.024 | 0.030  | 0.023 |
| rs16833232 | 3 | 182262873 | C | T | 0.011 | 0.002 | -0.014 | 0.013 | -0.013 | 0.017 | -0.013 | 0.017 |
| rs263041   | 3 | 183522231 | A | G | 0.012 | 0.002 | -0.003 | 0.013 | -0.013 | 0.017 | 0.005  | 0.016 |
| rs2293605  | 3 | 184044433 | C | T | 0.017 | 0.003 | 0.028  | 0.020 | 0.036  | 0.026 | 0.015  | 0.025 |
| rs1516725  | 3 | 185824004 | C | T | 0.036 | 0.002 | -0.029 | 0.018 | -0.031 | 0.023 | -0.038 | 0.023 |
| rs4677812  | 3 | 194863794 | C | A | 0.014 | 0.002 | 0.007  | 0.014 | 0.015  | 0.018 | 0.003  | 0.017 |
| rs6764533  | 3 | 196088464 | A | G | 0.012 | 0.002 | -0.038 | 0.013 | -0.041 | 0.017 | -0.039 | 0.017 |
| rs2051559  | 4 | 3298800   | C | T | 0.018 | 0.003 | 0.006  | 0.018 | 0.024  | 0.023 | -0.002 | 0.023 |
| rs2320726  | 4 | 18383743  | G | A | 0.014 | 0.002 | -0.010 | 0.012 | -0.005 | 0.016 | -0.018 | 0.016 |
| rs6849518  | 4 | 20120274  | T | C | 0.017 | 0.003 | 0.006  | 0.019 | 0.004  | 0.025 | -0.007 | 0.024 |
| rs6850639  | 4 | 21010996  | T | C | 0.012 | 0.002 | 0.000  | 0.016 | 0.008  | 0.020 | -0.012 | 0.020 |
| rs6841761  | 4 | 25423538  | G | T | 0.013 | 0.002 | 0.019  | 0.012 | 0.038  | 0.016 | 0.006  | 0.016 |
| rs6448587  | 4 | 28561990  | A | C | 0.017 | 0.002 | 0.005  | 0.016 | 0.014  | 0.021 | -0.006 | 0.020 |
| rs10007906 | 4 | 31023610  | A | C | 0.013 | 0.002 | -0.003 | 0.013 | 0.001  | 0.017 | -0.014 | 0.017 |
| rs12502727 | 4 | 38344189  | G | A | 0.016 | 0.003 | 0.008  | 0.020 | 0.038  | 0.026 | -0.014 | 0.025 |
| rs3209570  | 4 | 38699657  | G | A | 0.014 | 0.002 | 0.049  | 0.013 | 0.063  | 0.017 | 0.032  | 0.016 |
| rs10009336 | 4 | 44480783  | C | T | 0.014 | 0.002 | -0.017 | 0.017 | -0.032 | 0.022 | -0.004 | 0.021 |
| rs10938397 | 4 | 45182527  | G | A | 0.032 | 0.002 | -0.006 | 0.013 | -0.005 | 0.016 | -0.003 | 0.016 |
| rs2768950  | 4 | 49064487  | A | G | 0.012 | 0.002 | -0.005 | 0.014 | -0.002 | 0.018 | 0.004  | 0.018 |
| rs784944   | 4 | 52927229  | A | G | 0.012 | 0.002 | -0.008 | 0.014 | 0.004  | 0.018 | -0.008 | 0.018 |
| rs2192158  | 4 | 55505360  | A | G | 0.013 | 0.002 | 0.010  | 0.012 | 0.033  | 0.016 | -0.014 | 0.016 |
| rs11945861 | 4 | 65700865  | G | A | 0.015 | 0.002 | 0.030  | 0.015 | 0.031  | 0.019 | 0.040  | 0.019 |
| rs17001561 | 4 | 77096118  | A | G | 0.015 | 0.002 | 0.021  | 0.017 | 0.017  | 0.022 | 0.034  | 0.022 |
| rs7674623  | 4 | 80794681  | T | C | 0.014 | 0.002 | 0.005  | 0.016 | 0.005  | 0.020 | 0.006  | 0.020 |
| rs4148155  | 4 | 89054667  | A | G | 0.019 | 0.003 | -0.003 | 0.020 | -0.023 | 0.026 | 0.014  | 0.025 |
| rs2169399  | 4 | 91244218  | C | T | 0.011 | 0.002 | 0.011  | 0.012 | 0.005  | 0.016 | 0.017  | 0.016 |

|            |   |           |   |   |       |       |        |       |        |       |        |       |
|------------|---|-----------|---|---|-------|-------|--------|-------|--------|-------|--------|-------|
| rs1485038  | 4 | 94409429  | T | C | 0.014 | 0.002 | -0.009 | 0.016 | -0.009 | 0.020 | -0.016 | 0.020 |
| rs7685048  | 4 | 95027784  | C | T | 0.010 | 0.002 | -0.040 | 0.012 | -0.042 | 0.016 | -0.026 | 0.016 |
| rs1863652  | 4 | 95991417  | G | A | 0.012 | 0.002 | 0.011  | 0.013 | 0.009  | 0.017 | 0.000  | 0.017 |
| rs2850969  | 4 | 102183594 | C | T | 0.017 | 0.002 | 0.019  | 0.017 | 0.046  | 0.022 | 0.011  | 0.022 |
| rs13149344 | 4 | 102686178 | G | A | 0.012 | 0.002 | 0.032  | 0.015 | 0.036  | 0.019 | 0.031  | 0.019 |
| rs13107325 | 4 | 103188709 | T | C | 0.047 | 0.003 | 0.113  | 0.023 | 0.201  | 0.028 | 0.033  | 0.030 |
| rs223391   | 4 | 103748224 | G | A | 0.013 | 0.002 | -0.006 | 0.016 | 0.043  | 0.021 | -0.049 | 0.020 |
| rs326889   | 4 | 112713436 | C | T | 0.013 | 0.002 | 0.006  | 0.013 | 0.027  | 0.016 | -0.006 | 0.016 |
| rs4834272  | 4 | 113313986 | C | T | 0.012 | 0.002 | 0.004  | 0.013 | -0.003 | 0.017 | 0.013  | 0.017 |
| rs7694732  | 4 | 115124089 | A | G | 0.010 | 0.002 | 0.015  | 0.012 | 0.039  | 0.016 | -0.004 | 0.016 |
| rs4864201  | 4 | 130731284 | T | C | 0.014 | 0.002 | -0.028 | 0.013 | -0.026 | 0.017 | -0.024 | 0.017 |
| rs1296328  | 4 | 137083193 | A | C | 0.018 | 0.002 | 0.011  | 0.013 | 0.004  | 0.017 | 0.015  | 0.016 |
| rs769657   | 4 | 140877659 | A | G | 0.014 | 0.002 | -0.012 | 0.013 | 0.013  | 0.017 | -0.026 | 0.017 |
| rs331949   | 4 | 143663206 | C | T | 0.011 | 0.002 | -0.009 | 0.013 | -0.001 | 0.017 | -0.017 | 0.016 |
| rs6852276  | 4 | 145261999 | G | A | 0.011 | 0.002 | 0.017  | 0.013 | 0.023  | 0.016 | 0.015  | 0.016 |
| rs1455137  | 4 | 145986668 | C | A | 0.011 | 0.002 | -0.001 | 0.013 | -0.012 | 0.017 | 0.002  | 0.016 |
| rs11733337 | 4 | 147372978 | T | G | 0.014 | 0.002 | 0.017  | 0.014 | 0.020  | 0.018 | 0.015  | 0.018 |
| rs6827083  | 4 | 153075491 | G | A | 0.010 | 0.002 | 0.006  | 0.013 | 0.021  | 0.016 | -0.013 | 0.016 |
| rs13110266 | 4 | 162129844 | G | A | 0.012 | 0.002 | 0.008  | 0.013 | 0.000  | 0.016 | 0.015  | 0.016 |
| rs17538472 | 4 | 163038241 | T | C | 0.013 | 0.002 | 0.039  | 0.016 | 0.033  | 0.020 | 0.043  | 0.020 |
| rs1522569  | 4 | 171632637 | T | G | 0.016 | 0.002 | 0.000  | 0.016 | -0.014 | 0.020 | 0.017  | 0.020 |
| rs1158684  | 4 | 173584086 | A | G | 0.010 | 0.002 | -0.012 | 0.012 | 0.004  | 0.016 | -0.016 | 0.016 |
| rs7683836  | 4 | 180167906 | G | A | 0.011 | 0.002 | 0.014  | 0.013 | -0.004 | 0.016 | 0.026  | 0.016 |
| rs16871902 | 5 | 3488462   | A | G | 0.013 | 0.002 | -0.034 | 0.013 | -0.025 | 0.016 | -0.035 | 0.016 |
| rs4518345  | 5 | 27185904  | G | A | 0.012 | 0.002 | 0.011  | 0.014 | -0.001 | 0.018 | 0.023  | 0.018 |
| rs7730004  | 5 | 43191033  | T | C | 0.015 | 0.002 | 0.009  | 0.013 | 0.011  | 0.017 | 0.013  | 0.017 |
| rs13168660 | 5 | 50412012  | A | G | 0.017 | 0.003 | 0.025  | 0.019 | 0.058  | 0.024 | 0.004  | 0.024 |
| rs12189178 | 5 | 50914726  | T | C | 0.036 | 0.005 | -0.076 | 0.035 | -0.082 | 0.045 | -0.077 | 0.044 |
| rs4865796  | 5 | 53272664  | G | A | 0.010 | 0.002 | 0.000  | 0.013 | 0.016  | 0.017 | -0.015 | 0.017 |
| rs6449532  | 5 | 60715446  | C | T | 0.013 | 0.002 | 0.032  | 0.013 | 0.021  | 0.017 | 0.041  | 0.017 |
| rs1503526  | 5 | 63020706  | C | T | 0.014 | 0.002 | 0.003  | 0.012 | 0.012  | 0.016 | -0.016 | 0.016 |
| rs2367112  | 5 | 64168193  | T | G | 0.012 | 0.002 | -0.002 | 0.012 | -0.011 | 0.016 | 0.010  | 0.016 |
| rs460799   | 5 | 66191971  | G | A | 0.012 | 0.002 | 0.013  | 0.014 | -0.001 | 0.018 | 0.024  | 0.018 |
| rs13153166 | 5 | 71494931  | A | C | 0.023 | 0.004 | 0.017  | 0.030 | -0.016 | 0.038 | 0.055  | 0.038 |
| rs2973564  | 5 | 73151033  | A | G | 0.011 | 0.002 | 0.023  | 0.014 | 0.018  | 0.018 | 0.025  | 0.017 |
| rs4621537  | 5 | 74362222  | A | G | 0.020 | 0.002 | 0.015  | 0.013 | 0.003  | 0.017 | 0.022  | 0.016 |
| rs2307111  | 5 | 75003678  | T | C | 0.027 | 0.002 | 0.009  | 0.013 | -0.011 | 0.016 | 0.030  | 0.016 |
| rs252749   | 5 | 77389973  | G | A | 0.012 | 0.002 | 0.007  | 0.014 | -0.004 | 0.019 | 0.023  | 0.018 |
| rs10942267 | 5 | 80841914  | A | G | 0.016 | 0.002 | 0.003  | 0.013 | -0.002 | 0.017 | 0.004  | 0.017 |
| rs10942476 | 5 | 86172206  | G | A | 0.010 | 0.002 | -0.026 | 0.012 | -0.009 | 0.016 | -0.040 | 0.016 |
| rs323781   | 5 | 86752616  | C | A | 0.038 | 0.005 | -0.030 | 0.037 | -0.042 | 0.047 | -0.019 | 0.047 |
| rs10474271 | 5 | 87454270  | T | C | 0.014 | 0.002 | 0.010  | 0.015 | 0.032  | 0.019 | -0.004 | 0.019 |
| rs16903285 | 5 | 87978252  | C | T | 0.033 | 0.003 | -0.031 | 0.018 | -0.017 | 0.024 | -0.037 | 0.023 |
| rs16867703 | 5 | 88799143  | G | T | 0.014 | 0.002 | 0.011  | 0.013 | 0.005  | 0.016 | 0.010  | 0.016 |
| rs2009416  | 5 | 92415111  | C | T | 0.012 | 0.002 | 0.004  | 0.013 | 0.013  | 0.017 | 0.002  | 0.017 |
| rs159032   | 5 | 94206202  | T | C | 0.013 | 0.002 | -0.003 | 0.014 | -0.005 | 0.019 | -0.003 | 0.018 |
| rs7713317  | 5 | 95716722  | G | A | 0.016 | 0.002 | 0.002  | 0.014 | 0.007  | 0.018 | -0.009 | 0.017 |
| rs4703019  | 5 | 102053558 | A | G | 0.010 | 0.002 | -0.029 | 0.013 | -0.008 | 0.016 | -0.042 | 0.016 |
| rs11739877 | 5 | 105876806 | T | C | 0.012 | 0.002 | 0.000  | 0.013 | 0.012  | 0.017 | -0.010 | 0.016 |
| rs13168288 | 5 | 106385815 | A | G | 0.013 | 0.002 | 0.006  | 0.015 | 0.008  | 0.019 | 0.006  | 0.019 |
| rs40067    | 5 | 107439012 | G | A | 0.027 | 0.002 | 0.022  | 0.016 | 0.027  | 0.021 | 0.007  | 0.021 |

|            |   |           |   |   |       |       |        |       |        |       |        |       |
|------------|---|-----------|---|---|-------|-------|--------|-------|--------|-------|--------|-------|
| rs9326846  | 5 | 111301546 | G | A | 0.011 | 0.002 | -0.014 | 0.013 | -0.012 | 0.017 | -0.007 | 0.017 |
| rs12109548 | 5 | 112452241 | T | C | 0.010 | 0.002 | 0.017  | 0.013 | 0.025  | 0.017 | 0.008  | 0.016 |
| rs1402025  | 5 | 113987898 | C | T | 0.012 | 0.002 | 0.016  | 0.015 | 0.010  | 0.019 | 0.024  | 0.019 |
| rs6594967  | 5 | 115710803 | T | C | 0.011 | 0.002 | -0.011 | 0.013 | 0.016  | 0.017 | -0.032 | 0.017 |
| rs3511114  | 5 | 119368666 | T | C | 0.011 | 0.002 | 0.012  | 0.012 | 0.004  | 0.016 | 0.014  | 0.016 |
| rs1363695  | 5 | 130378027 | C | T | 0.013 | 0.002 | 0.055  | 0.015 | 0.093  | 0.020 | 0.025  | 0.019 |
| rs329122   | 5 | 133864599 | G | A | 0.013 | 0.002 | -0.034 | 0.013 | -0.036 | 0.016 | -0.026 | 0.016 |
| rs7716275  | 5 | 137631073 | G | T | 0.013 | 0.002 | 0.042  | 0.016 | 0.035  | 0.021 | 0.042  | 0.020 |
| rs13174863 | 5 | 139080745 | G | A | 0.019 | 0.002 | 0.007  | 0.018 | 0.018  | 0.023 | -0.015 | 0.023 |
| rs2074613  | 5 | 139714564 | T | C | 0.011 | 0.002 | 0.004  | 0.013 | -0.009 | 0.016 | 0.017  | 0.016 |
| rs2190788  | 5 | 144484261 | T | G | 0.014 | 0.002 | -0.001 | 0.013 | 0.008  | 0.017 | 0.001  | 0.017 |
| rs10066835 | 5 | 151254297 | T | C | 0.043 | 0.007 | 0.008  | 0.048 | -0.008 | 0.062 | 0.046  | 0.060 |
| rs294704   | 5 | 152519088 | G | T | 0.011 | 0.002 | -0.015 | 0.014 | -0.032 | 0.018 | 0.005  | 0.018 |
| rs7715256  | 5 | 153537893 | G | T | 0.017 | 0.002 | -0.010 | 0.013 | 0.022  | 0.016 | -0.035 | 0.016 |
| rs17056301 | 5 | 158271680 | C | T | 0.012 | 0.002 | -0.002 | 0.014 | 0.005  | 0.018 | -0.013 | 0.018 |
| rs248139   | 5 | 167352783 | A | G | 0.013 | 0.002 | -0.010 | 0.015 | -0.021 | 0.020 | -0.007 | 0.020 |
| rs7730898  | 5 | 170459675 | A | G | 0.017 | 0.002 | -0.018 | 0.014 | -0.007 | 0.018 | -0.023 | 0.018 |
| rs17695092 | 5 | 173337853 | T | G | 0.011 | 0.002 | 0.039  | 0.014 | 0.063  | 0.018 | 0.021  | 0.017 |
| rs6556301  | 5 | 176527577 | G | T | 0.011 | 0.002 | -0.001 | 0.013 | 0.001  | 0.017 | -0.006 | 0.017 |
| rs9463175  | 6 | 9510030   | C | T | 0.011 | 0.002 | -0.016 | 0.013 | -0.010 | 0.017 | -0.021 | 0.017 |
| rs2228213  | 6 | 12124855  | G | A | 0.014 | 0.002 | 0.011  | 0.013 | -0.001 | 0.017 | 0.026  | 0.016 |
| rs9367368  | 6 | 13189275  | T | C | 0.012 | 0.002 | 0.006  | 0.014 | 0.012  | 0.018 | 0.001  | 0.017 |
| rs17805532 | 6 | 18497348  | T | C | 0.023 | 0.004 | 0.011  | 0.027 | 0.032  | 0.034 | -0.010 | 0.034 |
| rs11753081 | 6 | 20705590  | T | G | 0.014 | 0.002 | -0.027 | 0.016 | -0.053 | 0.021 | -0.010 | 0.021 |
| rs7760082  | 6 | 21919387  | G | A | 0.012 | 0.002 | -0.015 | 0.013 | -0.023 | 0.017 | -0.008 | 0.017 |
| rs1511471  | 6 | 23868594  | A | G | 0.011 | 0.002 | -0.016 | 0.013 | -0.004 | 0.017 | -0.027 | 0.017 |
| rs3813680  | 6 | 24848086  | A | G | 0.014 | 0.002 | 0.005  | 0.017 | 0.025  | 0.023 | -0.007 | 0.022 |
| rs1150659  | 6 | 26100023  | G | A | 0.014 | 0.002 | -0.024 | 0.015 | -0.021 | 0.019 | -0.025 | 0.019 |
| rs4711122  | 6 | 26758479  | C | T | 0.013 | 0.002 | -0.022 | 0.015 | 0.005  | 0.019 | -0.039 | 0.018 |
| rs853681   | 6 | 28296650  | A | C | 0.014 | 0.002 | -0.011 | 0.017 | -0.031 | 0.022 | 0.005  | 0.022 |
| rs2523586  | 6 | 31327435  | T | G | 0.015 | 0.002 | 0.048  | 0.015 | 0.022  | 0.019 | 0.057  | 0.019 |
| rs498240   | 6 | 31892592  | G | A | 0.027 | 0.003 | 0.009  | 0.025 | -0.111 | 0.031 | 0.116  | 0.033 |
| rs6933607  | 6 | 33743997  | G | A | 0.016 | 0.002 | -0.007 | 0.015 | 0.007  | 0.019 | -0.025 | 0.019 |
| rs2744974  | 6 | 34579431  | T | C | 0.025 | 0.002 | -0.022 | 0.013 | -0.004 | 0.017 | -0.032 | 0.017 |
| rs732594   | 6 | 35206553  | C | A | 0.018 | 0.002 | 0.001  | 0.013 | -0.016 | 0.017 | 0.016  | 0.017 |
| rs17757975 | 6 | 38214150  | T | C | 0.014 | 0.002 | -0.005 | 0.018 | 0.002  | 0.023 | -0.013 | 0.022 |
| rs7748777  | 6 | 41133806  | A | G | 0.011 | 0.002 | -0.013 | 0.013 | 0.001  | 0.016 | -0.023 | 0.016 |
| rs6901756  | 6 | 41825590  | T | C | 0.015 | 0.003 | -0.024 | 0.019 | -0.010 | 0.024 | -0.044 | 0.024 |
| rs9349239  | 6 | 42676480  | A | G | 0.012 | 0.002 | -0.019 | 0.012 | -0.026 | 0.016 | -0.018 | 0.016 |
| rs998584   | 6 | 43757896  | C | A | 0.013 | 0.002 | 0.006  | 0.013 | 0.005  | 0.017 | -0.005 | 0.016 |
| rs6903387  | 6 | 46348834  | A | G | 0.013 | 0.002 | -0.022 | 0.013 | -0.016 | 0.016 | -0.019 | 0.016 |
| rs17665162 | 6 | 50275258  | C | T | 0.029 | 0.004 | 0.026  | 0.027 | 0.027  | 0.036 | 0.020  | 0.035 |
| rs987237   | 6 | 50803050  | G | A | 0.041 | 0.002 | 0.003  | 0.016 | 0.010  | 0.021 | 0.001  | 0.020 |
| rs2709671  | 6 | 51204404  | C | T | 0.012 | 0.002 | 0.003  | 0.012 | 0.012  | 0.016 | -0.005 | 0.016 |
| rs4711986  | 6 | 51789259  | A | G | 0.014 | 0.002 | -0.002 | 0.013 | -0.006 | 0.017 | -0.010 | 0.017 |
| rs9296723  | 6 | 53752062  | C | T | 0.011 | 0.002 | 0.003  | 0.013 | 0.012  | 0.017 | -0.003 | 0.016 |
| rs9475173  | 6 | 55013291  | A | G | 0.011 | 0.002 | -0.025 | 0.013 | -0.013 | 0.017 | -0.039 | 0.017 |
| rs1020548  | 6 | 56810539  | G | A | 0.013 | 0.002 | -0.023 | 0.016 | -0.034 | 0.021 | -0.002 | 0.021 |
| rs7742595  | 6 | 64161733  | T | C | 0.011 | 0.002 | 0.034  | 0.012 | 0.028  | 0.016 | 0.040  | 0.016 |
| rs2757763  | 6 | 70222480  | G | A | 0.012 | 0.002 | 0.023  | 0.014 | 0.027  | 0.018 | 0.025  | 0.018 |
| rs9688431  | 6 | 73922654  | T | C | 0.023 | 0.004 | 0.015  | 0.026 | 0.028  | 0.033 | 0.007  | 0.033 |

|            |   |           |   |   |       |       |        |       |        |       |        |       |
|------------|---|-----------|---|---|-------|-------|--------|-------|--------|-------|--------|-------|
| rs9294260  | 6 | 83433228  | A | G | 0.015 | 0.002 | -0.024 | 0.013 | -0.028 | 0.016 | -0.035 | 0.016 |
| rs1853639  | 6 | 87606842  | G | A | 0.011 | 0.002 | -0.001 | 0.013 | -0.015 | 0.017 | 0.007  | 0.017 |
| rs16882001 | 6 | 90322237  | G | A | 0.027 | 0.004 | -0.021 | 0.028 | -0.022 | 0.036 | -0.007 | 0.036 |
| rs7771567  | 6 | 97846571  | G | A | 0.015 | 0.002 | -0.010 | 0.013 | -0.036 | 0.017 | 0.008  | 0.017 |
| rs901630   | 6 | 98539519  | C | T | 0.015 | 0.002 | 0.005  | 0.013 | -0.004 | 0.016 | 0.002  | 0.016 |
| rs17789218 | 6 | 100600097 | C | T | 0.013 | 0.002 | 0.017  | 0.015 | 0.022  | 0.019 | 0.023  | 0.019 |
| rs13208757 | 6 | 101175014 | T | C | 0.011 | 0.002 | -0.014 | 0.012 | -0.023 | 0.016 | -0.014 | 0.016 |
| rs155510   | 6 | 104805862 | T | G | 0.017 | 0.002 | 0.009  | 0.016 | 0.005  | 0.020 | 0.013  | 0.020 |
| rs3800229  | 6 | 108996963 | T | G | 0.018 | 0.002 | 0.004  | 0.014 | -0.010 | 0.018 | 0.017  | 0.017 |
| rs9387640  | 6 | 119508871 | C | T | 0.012 | 0.002 | 0.001  | 0.013 | 0.006  | 0.017 | 0.000  | 0.016 |
| rs2357760  | 6 | 120213880 | A | G | 0.015 | 0.002 | -0.003 | 0.013 | 0.004  | 0.017 | -0.014 | 0.017 |
| rs1871329  | 6 | 124911534 | G | A | 0.013 | 0.002 | -0.005 | 0.015 | 0.012  | 0.019 | -0.017 | 0.019 |
| rs1159974  | 6 | 126090277 | C | T | 0.011 | 0.002 | 0.004  | 0.013 | 0.014  | 0.016 | -0.009 | 0.016 |
| rs6569648  | 6 | 130349119 | C | T | 0.013 | 0.002 | 0.010  | 0.015 | -0.006 | 0.019 | 0.029  | 0.019 |
| rs2246012  | 6 | 131898208 | C | T | 0.016 | 0.002 | 0.006  | 0.017 | 0.004  | 0.022 | 0.002  | 0.022 |
| rs13201877 | 6 | 137675541 | G | A | 0.015 | 0.002 | 0.001  | 0.018 | 0.011  | 0.024 | -0.015 | 0.023 |
| rs11754747 | 6 | 141494602 | T | C | 0.012 | 0.002 | -0.014 | 0.015 | -0.020 | 0.019 | -0.007 | 0.019 |
| rs765875   | 6 | 143185683 | C | T | 0.012 | 0.002 | -0.005 | 0.012 | 0.000  | 0.016 | -0.019 | 0.016 |
| rs2185027  | 6 | 153381622 | C | A | 0.014 | 0.002 | 0.006  | 0.014 | 0.004  | 0.018 | 0.009  | 0.017 |
| rs10499276 | 6 | 154309808 | T | C | 0.017 | 0.003 | 0.006  | 0.019 | 0.022  | 0.024 | -0.022 | 0.024 |
| rs9397928  | 6 | 156673243 | C | T | 0.012 | 0.002 | 0.008  | 0.014 | 0.004  | 0.018 | 0.002  | 0.018 |
| rs487060   | 6 | 160774459 | T | C | 0.011 | 0.002 | 0.004  | 0.012 | -0.007 | 0.016 | 0.012  | 0.016 |
| rs13191362 | 6 | 163033350 | A | G | 0.024 | 0.003 | -0.019 | 0.019 | -0.024 | 0.024 | -0.019 | 0.024 |
| rs9364687  | 6 | 163817911 | G | T | 0.011 | 0.002 | 0.009  | 0.013 | 0.027  | 0.016 | -0.014 | 0.016 |
| rs6461115  | 7 | 2103668   | A | G | 0.014 | 0.002 | 0.001  | 0.015 | 0.006  | 0.019 | -0.008 | 0.019 |
| rs4722398  | 7 | 3125220   | T | C | 0.016 | 0.003 | -0.006 | 0.018 | -0.043 | 0.024 | 0.024  | 0.023 |
| rs6463489  | 7 | 5542513   | T | C | 0.016 | 0.003 | -0.023 | 0.021 | -0.027 | 0.027 | -0.009 | 0.026 |
| rs7784465  | 7 | 6418275   | C | T | 0.016 | 0.003 | 0.006  | 0.018 | -0.009 | 0.024 | 0.019  | 0.023 |
| rs6968554  | 7 | 17287106  | G | A | 0.010 | 0.002 | 0.004  | 0.013 | 0.000  | 0.017 | 0.016  | 0.016 |
| rs10263780 | 7 | 19778086  | G | A | 0.016 | 0.003 | 0.020  | 0.018 | 0.013  | 0.023 | 0.029  | 0.023 |
| rs2158414  | 7 | 21491021  | T | C | 0.010 | 0.002 | -0.001 | 0.013 | -0.007 | 0.017 | 0.008  | 0.017 |
| rs4307239  | 7 | 24354300  | G | A | 0.012 | 0.002 | -0.004 | 0.013 | 0.006  | 0.016 | -0.008 | 0.016 |
| rs11971041 | 7 | 26698848  | G | A | 0.021 | 0.003 | 0.002  | 0.022 | 0.007  | 0.028 | -0.008 | 0.028 |
| rs4722672  | 7 | 27231762  | C | T | 0.015 | 0.002 | 0.083  | 0.016 | 0.054  | 0.021 | 0.108  | 0.021 |
| rs849135   | 7 | 28196413  | A | G | 0.011 | 0.002 | -0.036 | 0.012 | -0.069 | 0.016 | -0.003 | 0.016 |
| rs215634   | 7 | 32369148  | A | G | 0.015 | 0.002 | 0.005  | 0.013 | 0.002  | 0.016 | -0.005 | 0.016 |
| rs2237403  | 7 | 39448936  | C | T | 0.012 | 0.002 | -0.005 | 0.013 | 0.001  | 0.017 | -0.014 | 0.017 |
| rs2289379  | 7 | 44804225  | C | T | 0.014 | 0.002 | -0.041 | 0.013 | -0.042 | 0.017 | -0.032 | 0.016 |
| rs10269783 | 7 | 49616203  | A | G | 0.013 | 0.002 | 0.006  | 0.013 | 0.018  | 0.017 | -0.002 | 0.016 |
| rs3807566  | 7 | 50564204  | G | T | 0.013 | 0.002 | 0.012  | 0.012 | 0.003  | 0.016 | 0.021  | 0.016 |
| rs726372   | 7 | 69320268  | G | A | 0.011 | 0.002 | 0.003  | 0.013 | 0.007  | 0.017 | -0.005 | 0.017 |
| rs4718966  | 7 | 70040558  | T | C | 0.013 | 0.002 | -0.011 | 0.013 | -0.012 | 0.016 | -0.005 | 0.016 |
| rs4717623  | 7 | 71434369  | C | T | 0.014 | 0.002 | -0.005 | 0.014 | 0.007  | 0.018 | -0.009 | 0.018 |
| rs6964833  | 7 | 74101909  | C | T | 0.016 | 0.002 | -0.056 | 0.015 | -0.063 | 0.019 | -0.051 | 0.018 |
| rs17207196 | 7 | 75101065  | C | T | 0.022 | 0.002 | -0.040 | 0.013 | -0.035 | 0.017 | -0.052 | 0.017 |
| rs17685    | 7 | 75616105  | A | G | 0.011 | 0.002 | 0.010  | 0.014 | -0.008 | 0.018 | 0.024  | 0.018 |
| rs2245368  | 7 | 76608143  | C | T | 0.026 | 0.002 | 0.040  | 0.018 | 0.039  | 0.024 | 0.045  | 0.023 |
| rs740157   | 7 | 77055885  | A | G | 0.012 | 0.002 | -0.005 | 0.013 | -0.013 | 0.016 | 0.003  | 0.016 |
| rs1544459  | 7 | 77417584  | C | T | 0.010 | 0.002 | -0.008 | 0.012 | 0.004  | 0.016 | -0.021 | 0.016 |
| rs1852006  | 7 | 77829768  | G | A | 0.016 | 0.002 | -0.006 | 0.013 | 0.011  | 0.017 | -0.020 | 0.017 |
| rs6963840  | 7 | 78144371  | T | C | 0.015 | 0.002 | 0.001  | 0.017 | 0.041  | 0.022 | -0.036 | 0.022 |

|            |   |           |   |   |       |       |        |       |        |       |        |       |
|------------|---|-----------|---|---|-------|-------|--------|-------|--------|-------|--------|-------|
| rs10259665 | 7 | 79061837  | A | G | 0.011 | 0.002 | -0.027 | 0.013 | -0.010 | 0.017 | -0.041 | 0.017 |
| rs802460   | 7 | 86260816  | T | C | 0.011 | 0.002 | -0.015 | 0.013 | -0.022 | 0.017 | -0.013 | 0.017 |
| rs7780752  | 7 | 93241640  | C | T | 0.014 | 0.002 | -0.023 | 0.013 | -0.041 | 0.017 | -0.011 | 0.017 |
| rs13240600 | 7 | 99064466  | A | G | 0.020 | 0.002 | -0.015 | 0.017 | -0.009 | 0.022 | -0.024 | 0.022 |
| rs1048303  | 7 | 100804140 | C | T | 0.011 | 0.002 | -0.007 | 0.013 | 0.003  | 0.016 | -0.019 | 0.016 |
| rs11496125 | 7 | 103417557 | T | C | 0.017 | 0.002 | 0.022  | 0.013 | 0.005  | 0.016 | 0.029  | 0.016 |
| rs1524277  | 7 | 109173130 | C | T | 0.011 | 0.002 | 0.002  | 0.012 | 0.016  | 0.016 | -0.006 | 0.016 |
| rs7788008  | 7 | 112972483 | G | A | 0.016 | 0.002 | -0.009 | 0.013 | -0.043 | 0.016 | 0.024  | 0.016 |
| rs12705916 | 7 | 113492834 | C | T | 0.016 | 0.002 | 0.015  | 0.013 | 0.022  | 0.017 | 0.004  | 0.016 |
| rs2045293  | 7 | 114350102 | T | C | 0.014 | 0.002 | -0.030 | 0.013 | -0.037 | 0.016 | -0.023 | 0.016 |
| rs1899689  | 7 | 121964349 | T | C | 0.012 | 0.002 | -0.003 | 0.013 | 0.012  | 0.016 | -0.015 | 0.016 |
| rs2283093  | 7 | 126721231 | T | C | 0.013 | 0.002 | 0.010  | 0.015 | 0.017  | 0.020 | 0.000  | 0.020 |
| rs896183   | 7 | 127831580 | A | G | 0.010 | 0.002 | 0.018  | 0.013 | 0.026  | 0.017 | 0.004  | 0.017 |
| rs972283   | 7 | 130466854 | A | G | 0.010 | 0.002 | 0.027  | 0.013 | 0.025  | 0.016 | 0.035  | 0.016 |
| rs7802342  | 7 | 137435925 | G | T | 0.012 | 0.002 | -0.004 | 0.014 | -0.001 | 0.018 | -0.003 | 0.018 |
| rs7811342  | 7 | 138794618 | T | C | 0.020 | 0.003 | -0.027 | 0.020 | 0.016  | 0.027 | -0.052 | 0.026 |
| rs10243319 | 7 | 147674678 | T | C | 0.011 | 0.002 | -0.015 | 0.013 | -0.033 | 0.016 | -0.013 | 0.016 |
| rs2907948  | 7 | 150638484 | G | A | 0.014 | 0.002 | -0.005 | 0.015 | 0.009  | 0.019 | -0.017 | 0.018 |
| rs1658820  | 8 | 4288577   | T | G | 0.014 | 0.002 | 0.018  | 0.015 | 0.020  | 0.019 | 0.021  | 0.019 |
| rs7837587  | 8 | 8378992   | C | T | 0.016 | 0.002 | -0.001 | 0.012 | 0.009  | 0.016 | -0.009 | 0.016 |
| rs1045529  | 8 | 8890098   | T | C | 0.016 | 0.002 | 0.009  | 0.013 | 0.002  | 0.016 | 0.017  | 0.016 |
| rs615632   | 8 | 9796321   | C | T | 0.017 | 0.002 | 0.010  | 0.013 | 0.030  | 0.016 | -0.007 | 0.016 |
| rs6985109  | 8 | 10761585  | G | A | 0.018 | 0.002 | 0.016  | 0.012 | 0.038  | 0.016 | -0.010 | 0.016 |
| rs12549150 | 8 | 11422936  | T | C | 0.017 | 0.002 | 0.001  | 0.013 | 0.008  | 0.016 | -0.006 | 0.016 |
| rs13263601 | 8 | 14095900  | C | A | 0.015 | 0.002 | 0.013  | 0.013 | 0.019  | 0.017 | 0.007  | 0.017 |
| rs13278290 | 8 | 15560370  | T | C | 0.012 | 0.002 | -0.010 | 0.013 | -0.014 | 0.017 | -0.011 | 0.016 |
| rs2616192  | 8 | 20668624  | T | G | 0.013 | 0.002 | -0.005 | 0.013 | 0.008  | 0.017 | -0.014 | 0.017 |
| rs11781222 | 8 | 23389571  | T | C | 0.016 | 0.002 | 0.032  | 0.018 | -0.005 | 0.023 | 0.059  | 0.023 |
| rs11784576 | 8 | 25661397  | T | G | 0.011 | 0.002 | -0.023 | 0.014 | -0.014 | 0.017 | -0.036 | 0.017 |
| rs17446091 | 8 | 27167942  | C | T | 0.012 | 0.002 | 0.038  | 0.015 | 0.042  | 0.019 | 0.033  | 0.019 |
| rs1982441  | 8 | 28021769  | T | G | 0.018 | 0.003 | 0.041  | 0.018 | 0.061  | 0.024 | 0.022  | 0.023 |
| rs1421334  | 8 | 30865733  | A | C | 0.013 | 0.002 | 0.018  | 0.013 | 0.014  | 0.016 | 0.020  | 0.016 |
| rs7826312  | 8 | 32400115  | C | T | 0.010 | 0.002 | -0.019 | 0.013 | -0.025 | 0.016 | -0.027 | 0.016 |
| rs12545740 | 8 | 33455300  | A | C | 0.011 | 0.002 | 0.006  | 0.013 | 0.011  | 0.017 | 0.004  | 0.016 |
| rs7844647  | 8 | 34503776  | T | C | 0.012 | 0.002 | -0.001 | 0.014 | -0.012 | 0.018 | 0.010  | 0.018 |
| rs6471941  | 8 | 62117973  | A | G | 0.016 | 0.002 | -0.017 | 0.017 | -0.055 | 0.022 | 0.006  | 0.021 |
| rs705980   | 8 | 64727201  | C | T | 0.011 | 0.002 | 0.001  | 0.012 | 0.005  | 0.016 | -0.009 | 0.016 |
| rs16932761 | 8 | 67202787  | G | A | 0.014 | 0.002 | -0.002 | 0.014 | 0.013  | 0.018 | 0.001  | 0.018 |
| rs1431659  | 8 | 73439070  | A | G | 0.020 | 0.002 | -0.013 | 0.014 | -0.001 | 0.018 | -0.020 | 0.018 |
| rs2170382  | 8 | 74689288  | T | C | 0.017 | 0.003 | 0.008  | 0.020 | 0.022  | 0.025 | -0.014 | 0.025 |
| rs2926614  | 8 | 76301610  | C | T | 0.019 | 0.002 | -0.022 | 0.016 | 0.002  | 0.021 | -0.050 | 0.020 |
| rs17405819 | 8 | 76806584  | T | C | 0.022 | 0.002 | -0.003 | 0.014 | -0.002 | 0.017 | -0.013 | 0.017 |
| rs7010763  | 8 | 77342772  | G | A | 0.016 | 0.002 | 0.003  | 0.014 | 0.015  | 0.018 | -0.004 | 0.018 |
| rs16907751 | 8 | 81375457  | C | T | 0.021 | 0.003 | -0.009 | 0.021 | -0.009 | 0.027 | -0.024 | 0.026 |
| rs733594   | 8 | 85077686  | T | C | 0.014 | 0.002 | -0.018 | 0.014 | -0.040 | 0.018 | -0.003 | 0.018 |
| rs2467210  | 8 | 85679207  | G | A | 0.015 | 0.002 | 0.001  | 0.015 | -0.002 | 0.019 | 0.009  | 0.019 |
| rs7006629  | 8 | 87519542  | T | C | 0.011 | 0.002 | -0.021 | 0.012 | -0.023 | 0.016 | -0.024 | 0.016 |
| rs2174367  | 8 | 89408196  | G | T | 0.012 | 0.002 | -0.003 | 0.013 | -0.002 | 0.017 | 0.004  | 0.017 |
| rs1899898  | 8 | 93240419  | T | C | 0.011 | 0.002 | 0.022  | 0.013 | 0.028  | 0.017 | 0.025  | 0.017 |
| rs12680842 | 8 | 95582606  | A | G | 0.013 | 0.002 | 0.011  | 0.013 | -0.006 | 0.017 | 0.024  | 0.017 |
| rs3134358  | 8 | 101958433 | T | G | 0.013 | 0.002 | -0.008 | 0.013 | 0.000  | 0.016 | -0.008 | 0.016 |



|            |    |           |   |   |       |       |        |       |        |       |        |       |
|------------|----|-----------|---|---|-------|-------|--------|-------|--------|-------|--------|-------|
| rs13250058 | 8  | 112270826 | T | G | 0.011 | 0.002 | -0.015 | 0.013 | -0.013 | 0.017 | -0.026 | 0.017 |
| rs2694047  | 8  | 116750548 | G | A | 0.019 | 0.002 | -0.012 | 0.015 | -0.013 | 0.019 | -0.003 | 0.018 |
| rs17450772 | 8  | 118895712 | C | T | 0.019 | 0.003 | -0.009 | 0.020 | 0.008  | 0.025 | -0.026 | 0.025 |
| rs12682037 | 8  | 132880474 | C | T | 0.016 | 0.003 | 0.009  | 0.019 | 0.009  | 0.025 | 0.006  | 0.025 |
| rs16906845 | 8  | 138215228 | G | A | 0.023 | 0.004 | -0.027 | 0.026 | 0.002  | 0.034 | -0.057 | 0.033 |
| rs7357604  | 8  | 142629949 | G | A | 0.011 | 0.002 | -0.023 | 0.013 | -0.005 | 0.017 | -0.039 | 0.016 |
| rs4072917  | 8  | 143300279 | A | G | 0.012 | 0.002 | 0.032  | 0.013 | 0.030  | 0.016 | 0.031  | 0.016 |
| rs7042372  | 9  | 6959840   | A | G | 0.012 | 0.002 | -0.002 | 0.013 | -0.014 | 0.017 | 0.008  | 0.017 |
| rs1865341  | 9  | 8845911   | T | C | 0.013 | 0.002 | 0.002  | 0.015 | 0.011  | 0.019 | -0.005 | 0.018 |
| rs10118866 | 9  | 10119157  | T | G | 0.012 | 0.002 | 0.002  | 0.015 | -0.001 | 0.019 | 0.001  | 0.019 |
| rs1535660  | 9  | 10371073  | T | C | 0.015 | 0.003 | -0.010 | 0.018 | 0.003  | 0.023 | -0.029 | 0.023 |
| rs10959687 | 9  | 11280652  | A | G | 0.012 | 0.002 | 0.018  | 0.012 | 0.025  | 0.016 | 0.010  | 0.016 |
| rs17820822 | 9  | 11831420  | T | G | 0.014 | 0.002 | 0.004  | 0.013 | 0.009  | 0.017 | -0.002 | 0.016 |
| rs13298062 | 9  | 13941513  | A | G | 0.014 | 0.002 | -0.013 | 0.016 | -0.024 | 0.020 | -0.005 | 0.020 |
| rs7031064  | 9  | 14455076  | A | G | 0.011 | 0.002 | 0.021  | 0.012 | 0.029  | 0.016 | 0.008  | 0.016 |
| rs4740619  | 9  | 15634326  | T | C | 0.019 | 0.002 | 0.001  | 0.012 | -0.001 | 0.016 | 0.007  | 0.016 |
| rs10962549 | 9  | 16719445  | T | C | 0.020 | 0.002 | 0.012  | 0.016 | 0.011  | 0.021 | 0.011  | 0.021 |
| rs10811901 | 9  | 23356935  | A | G | 0.011 | 0.002 | 0.008  | 0.012 | 0.026  | 0.016 | -0.014 | 0.016 |
| rs7874154  | 9  | 27777012  | C | T | 0.013 | 0.002 | -0.023 | 0.012 | -0.023 | 0.016 | -0.024 | 0.016 |
| rs10968576 | 9  | 28414339  | G | A | 0.025 | 0.002 | 0.018  | 0.013 | 0.025  | 0.017 | 0.015  | 0.017 |
| rs16914051 | 9  | 28943416  | C | T | 0.015 | 0.002 | -0.013 | 0.017 | 0.000  | 0.022 | -0.031 | 0.022 |
| rs11792311 | 9  | 29672405  | G | A | 0.014 | 0.002 | 0.004  | 0.015 | -0.030 | 0.019 | 0.028  | 0.019 |
| rs17720922 | 9  | 31030917  | T | C | 0.013 | 0.002 | 0.000  | 0.016 | 0.001  | 0.020 | 0.002  | 0.020 |
| rs10971721 | 9  | 33827694  | C | T | 0.020 | 0.003 | -0.030 | 0.020 | -0.022 | 0.026 | -0.034 | 0.025 |
| rs13290794 | 9  | 37183628  | G | A | 0.014 | 0.002 | -0.003 | 0.013 | -0.008 | 0.017 | -0.001 | 0.016 |
| rs10746862 | 9  | 73780912  | G | T | 0.012 | 0.002 | 0.014  | 0.013 | 0.002  | 0.016 | 0.027  | 0.016 |
| rs1634350  | 9  | 81334684  | A | C | 0.012 | 0.002 | -0.002 | 0.013 | 0.012  | 0.017 | -0.015 | 0.016 |
| rs11138313 | 9  | 82240968  | A | G | 0.017 | 0.003 | -0.006 | 0.021 | -0.024 | 0.027 | -0.002 | 0.027 |
| rs2796456  | 9  | 84193487  | A | C | 0.012 | 0.002 | 0.024  | 0.014 | 0.026  | 0.018 | 0.018  | 0.018 |
| rs1187352  | 9  | 87293457  | C | T | 0.012 | 0.002 | 0.016  | 0.013 | 0.020  | 0.017 | 0.009  | 0.017 |
| rs12380880 | 9  | 88912765  | C | T | 0.013 | 0.002 | 0.008  | 0.015 | 0.006  | 0.019 | 0.017  | 0.019 |
| rs10797115 | 9  | 92191256  | T | C | 0.012 | 0.002 | -0.012 | 0.013 | -0.025 | 0.016 | 0.000  | 0.016 |
| rs7869771  | 9  | 94180627  | A | C | 0.014 | 0.002 | 0.026  | 0.014 | 0.012  | 0.018 | 0.025  | 0.018 |
| rs9650755  | 9  | 96484342  | G | A | 0.015 | 0.002 | -0.008 | 0.014 | -0.005 | 0.018 | -0.008 | 0.018 |
| rs420158   | 9  | 101477500 | C | T | 0.012 | 0.002 | 0.013  | 0.015 | 0.011  | 0.019 | 0.017  | 0.018 |
| rs4989244  | 9  | 102100348 | G | A | 0.011 | 0.002 | 0.005  | 0.013 | 0.023  | 0.016 | -0.015 | 0.016 |
| rs9299338  | 9  | 103108178 | G | A | 0.017 | 0.002 | 0.024  | 0.013 | 0.027  | 0.017 | 0.017  | 0.017 |
| rs10989568 | 9  | 104396304 | A | G | 0.011 | 0.002 | -0.010 | 0.012 | -0.009 | 0.016 | -0.005 | 0.016 |
| rs7024334  | 9  | 109072075 | T | G | 0.014 | 0.002 | -0.019 | 0.015 | -0.018 | 0.019 | -0.011 | 0.019 |
| rs6477694  | 9  | 111932342 | C | T | 0.012 | 0.002 | 0.022  | 0.013 | 0.033  | 0.017 | 0.014  | 0.017 |
| rs1928295  | 9  | 120378483 | T | C | 0.014 | 0.002 | -0.007 | 0.012 | 0.006  | 0.016 | -0.025 | 0.016 |
| rs1327808  | 9  | 120896390 | G | A | 0.013 | 0.002 | -0.039 | 0.016 | -0.038 | 0.021 | -0.028 | 0.021 |
| rs7865157  | 9  | 122631560 | T | C | 0.018 | 0.003 | -0.019 | 0.021 | -0.036 | 0.027 | 0.004  | 0.026 |
| rs10818810 | 9  | 126096522 | A | G | 0.013 | 0.002 | -0.014 | 0.013 | -0.013 | 0.017 | -0.008 | 0.016 |
| rs10818938 | 9  | 127049237 | A | G | 0.011 | 0.002 | -0.012 | 0.013 | -0.009 | 0.016 | -0.018 | 0.016 |
| rs13292976 | 9  | 129467340 | T | C | 0.013 | 0.002 | 0.003  | 0.013 | -0.008 | 0.016 | 0.005  | 0.016 |
| rs12005136 | 9  | 131059830 | C | A | 0.019 | 0.003 | -0.003 | 0.018 | -0.005 | 0.023 | 0.012  | 0.022 |
| rs4740383  | 9  | 133783566 | A | G | 0.013 | 0.002 | -0.004 | 0.013 | 0.004  | 0.017 | -0.012 | 0.016 |
| rs11792069 | 9  | 140646121 | A | G | 0.015 | 0.002 | -0.008 | 0.018 | 0.012  | 0.023 | -0.017 | 0.022 |
| rs11251352 | 10 | 2585792   | G | A | 0.011 | 0.002 | -0.009 | 0.013 | 0.001  | 0.016 | -0.020 | 0.016 |
| rs10795422 | 10 | 16759312  | G | A | 0.014 | 0.002 | 0.026  | 0.014 | 0.014  | 0.018 | 0.044  | 0.017 |

|            |    |           |   |   |       |       |        |       |        |       |        |       |
|------------|----|-----------|---|---|-------|-------|--------|-------|--------|-------|--------|-------|
| rs12768319 | 10 | 19812754  | C | T | 0.012 | 0.002 | 0.013  | 0.014 | 0.021  | 0.018 | 0.009  | 0.018 |
| rs7084454  | 10 | 21821274  | A | G | 0.019 | 0.002 | 0.021  | 0.013 | 0.011  | 0.017 | 0.016  | 0.017 |
| rs12762034 | 10 | 33969931  | C | T | 0.024 | 0.003 | 0.053  | 0.023 | 0.057  | 0.030 | 0.067  | 0.029 |
| rs2477017  | 10 | 34911879  | A | G | 0.010 | 0.002 | 0.013  | 0.013 | 0.039  | 0.017 | -0.003 | 0.016 |
| rs1937683  | 10 | 53679060  | T | C | 0.011 | 0.002 | 0.006  | 0.013 | 0.003  | 0.017 | 0.010  | 0.017 |
| rs6479905  | 10 | 65315231  | G | A | 0.013 | 0.002 | -0.021 | 0.012 | -0.021 | 0.016 | -0.012 | 0.016 |
| rs12098284 | 10 | 76047464  | T | C | 0.018 | 0.003 | 0.026  | 0.018 | 0.010  | 0.024 | 0.045  | 0.023 |
| rs4745794  | 10 | 77534000  | G | A | 0.011 | 0.002 | 0.007  | 0.013 | -0.017 | 0.016 | 0.026  | 0.016 |
| rs11001963 | 10 | 78760959  | T | C | 0.011 | 0.002 | 0.018  | 0.013 | 0.034  | 0.016 | 0.010  | 0.016 |
| rs7899106  | 10 | 87410904  | G | A | 0.033 | 0.004 | -0.029 | 0.029 | 0.011  | 0.037 | -0.075 | 0.037 |
| rs2114824  | 10 | 88119015  | G | A | 0.013 | 0.002 | -0.005 | 0.012 | -0.024 | 0.016 | 0.007  | 0.016 |
| rs1468069  | 10 | 98988759  | A | C | 0.010 | 0.002 | -0.009 | 0.013 | -0.008 | 0.017 | -0.012 | 0.017 |
| rs577525   | 10 | 99769388  | C | T | 0.017 | 0.002 | 0.023  | 0.013 | 0.053  | 0.016 | 0.006  | 0.016 |
| rs17094222 | 10 | 102395440 | C | T | 0.018 | 0.002 | 0.000  | 0.015 | -0.002 | 0.020 | 0.006  | 0.020 |
| rs9787495  | 10 | 103206115 | G | A | 0.010 | 0.002 | -0.012 | 0.013 | -0.002 | 0.016 | -0.020 | 0.016 |
| rs7083450  | 10 | 103984060 | T | C | 0.016 | 0.002 | 0.001  | 0.017 | 0.016  | 0.022 | -0.015 | 0.022 |
| rs12411886 | 10 | 104685299 | A | C | 0.027 | 0.003 | -0.013 | 0.022 | -0.015 | 0.029 | 0.001  | 0.029 |
| rs7903146  | 10 | 114758349 | C | T | 0.018 | 0.002 | 0.012  | 0.014 | 0.007  | 0.018 | 0.015  | 0.017 |
| rs10886017 | 10 | 118672531 | A | C | 0.015 | 0.002 | -0.038 | 0.015 | -0.041 | 0.019 | -0.039 | 0.018 |
| rs4523610  | 10 | 122069448 | C | T | 0.012 | 0.002 | -0.017 | 0.015 | -0.014 | 0.019 | -0.022 | 0.019 |
| rs845084   | 10 | 125220036 | A | G | 0.014 | 0.002 | 0.002  | 0.014 | 0.015  | 0.018 | 0.000  | 0.018 |
| rs17636031 | 10 | 126594078 | C | T | 0.016 | 0.002 | -0.016 | 0.015 | -0.028 | 0.019 | 0.004  | 0.019 |
| rs4880341  | 10 | 133992689 | C | T | 0.012 | 0.002 | -0.005 | 0.013 | -0.004 | 0.016 | -0.010 | 0.016 |
| rs4963120  | 11 | 825777    | T | C | 0.013 | 0.002 | 0.032  | 0.013 | 0.011  | 0.016 | 0.059  | 0.016 |
| rs10840606 | 11 | 2234690   | G | A | 0.016 | 0.002 | 0.047  | 0.016 | 0.057  | 0.021 | 0.035  | 0.021 |
| rs4929923  | 11 | 8639200   | C | T | 0.018 | 0.002 | 0.007  | 0.013 | 0.018  | 0.017 | -0.008 | 0.016 |
| rs1037587  | 11 | 11796727  | T | C | 0.011 | 0.002 | 0.028  | 0.013 | 0.036  | 0.016 | 0.018  | 0.016 |
| rs4757144  | 11 | 13331226  | A | G | 0.017 | 0.002 | 0.001  | 0.013 | -0.007 | 0.016 | 0.004  | 0.016 |
| rs1557765  | 11 | 17403639  | C | T | 0.012 | 0.002 | 0.028  | 0.013 | 0.043  | 0.016 | 0.010  | 0.016 |
| rs6265     | 11 | 27679916  | C | T | 0.041 | 0.002 | 0.008  | 0.016 | -0.026 | 0.020 | 0.030  | 0.020 |
| rs481554   | 11 | 28721187  | G | A | 0.011 | 0.002 | -0.027 | 0.013 | -0.022 | 0.017 | -0.037 | 0.017 |
| rs2467594  | 11 | 29224006  | G | A | 0.012 | 0.002 | 0.005  | 0.013 | 0.007  | 0.016 | -0.004 | 0.016 |
| rs2065418  | 11 | 30422068  | T | G | 0.017 | 0.002 | -0.005 | 0.013 | 0.002  | 0.017 | -0.011 | 0.016 |
| rs223051   | 11 | 32131303  | T | C | 0.011 | 0.002 | 0.018  | 0.013 | 0.038  | 0.017 | 0.003  | 0.017 |
| rs10768994 | 11 | 43936945  | T | C | 0.011 | 0.002 | -0.009 | 0.013 | -0.013 | 0.016 | 0.000  | 0.016 |
| rs10838465 | 11 | 45426141  | A | C | 0.014 | 0.002 | -0.013 | 0.013 | 0.013  | 0.017 | -0.044 | 0.017 |
| rs10160701 | 11 | 46551918  | T | C | 0.014 | 0.002 | 0.000  | 0.016 | 0.008  | 0.021 | 0.000  | 0.021 |
| rs7124681  | 11 | 47529947  | A | C | 0.026 | 0.002 | 0.016  | 0.013 | 0.026  | 0.016 | 0.012  | 0.016 |
| rs1483121  | 11 | 48333360  | G | A | 0.017 | 0.002 | -0.008 | 0.019 | -0.023 | 0.023 | 0.016  | 0.024 |
| rs7120873  | 11 | 49459474  | T | C | 0.017 | 0.003 | 0.000  | 0.020 | 0.011  | 0.026 | -0.003 | 0.025 |
| rs11228824 | 11 | 56634316  | G | A | 0.013 | 0.002 | 0.021  | 0.016 | 0.048  | 0.021 | -0.005 | 0.020 |
| rs7947143  | 11 | 64090422  | G | A | 0.018 | 0.002 | -0.024 | 0.017 | -0.035 | 0.022 | -0.009 | 0.022 |
| rs506338   | 11 | 64440920  | C | T | 0.013 | 0.002 | 0.004  | 0.014 | 0.000  | 0.018 | 0.006  | 0.017 |
| rs653264   | 11 | 68699775  | G | A | 0.010 | 0.002 | 0.002  | 0.012 | 0.006  | 0.016 | -0.001 | 0.016 |
| rs592483   | 11 | 69445173  | C | T | 0.015 | 0.002 | -0.007 | 0.013 | -0.003 | 0.017 | -0.012 | 0.016 |
| rs7123876  | 11 | 72444583  | C | T | 0.012 | 0.002 | 0.016  | 0.014 | 0.051  | 0.019 | -0.012 | 0.018 |
| rs1465900  | 11 | 76473138  | A | C | 0.013 | 0.002 | -0.011 | 0.015 | -0.009 | 0.019 | -0.016 | 0.019 |
| rs7117238  | 11 | 78040259  | G | A | 0.013 | 0.002 | -0.045 | 0.017 | -0.027 | 0.021 | -0.067 | 0.021 |
| rs349088   | 11 | 84814393  | C | A | 0.013 | 0.002 | 0.017  | 0.012 | 0.023  | 0.016 | 0.016  | 0.016 |
| rs3781815  | 11 | 85341933  | T | C | 0.013 | 0.002 | -0.001 | 0.016 | 0.016  | 0.020 | -0.014 | 0.020 |
| rs10830452 | 11 | 89966202  | G | A | 0.011 | 0.002 | -0.003 | 0.013 | -0.002 | 0.017 | -0.003 | 0.017 |

|            |    |           |   |   |       |       |        |       |        |       |        |       |
|------------|----|-----------|---|---|-------|-------|--------|-------|--------|-------|--------|-------|
| rs2605603  | 11 | 93221105  | G | A | 0.010 | 0.002 | -0.002 | 0.012 | 0.001  | 0.016 | -0.017 | 0.016 |
| rs2155645  | 11 | 112912947 | C | T | 0.012 | 0.002 | 0.016  | 0.014 | 0.027  | 0.018 | 0.005  | 0.018 |
| rs719802   | 11 | 113234679 | T | C | 0.010 | 0.002 | 0.001  | 0.013 | -0.009 | 0.017 | 0.000  | 0.016 |
| rs1048932  | 11 | 115044850 | C | A | 0.016 | 0.002 | 0.001  | 0.013 | 0.018  | 0.016 | -0.024 | 0.016 |
| rs12420725 | 11 | 117017530 | G | A | 0.023 | 0.004 | 0.041  | 0.027 | 0.032  | 0.034 | 0.051  | 0.034 |
| rs1786141  | 11 | 118938315 | T | C | 0.013 | 0.002 | 0.004  | 0.013 | 0.009  | 0.016 | 0.002  | 0.016 |
| rs7941030  | 11 | 122522375 | C | T | 0.011 | 0.002 | 0.010  | 0.013 | 0.018  | 0.016 | 0.010  | 0.016 |
| rs7925214  | 11 | 130794253 | T | C | 0.015 | 0.002 | -0.007 | 0.013 | 0.009  | 0.016 | -0.019 | 0.016 |
| rs2512885  | 11 | 131467794 | C | T | 0.013 | 0.002 | 0.022  | 0.012 | 0.020  | 0.016 | 0.020  | 0.016 |
| rs11222940 | 11 | 131985721 | C | A | 0.012 | 0.002 | -0.001 | 0.013 | -0.016 | 0.017 | 0.012  | 0.017 |
| rs4936175  | 11 | 132641959 | C | T | 0.012 | 0.002 | -0.020 | 0.013 | -0.017 | 0.016 | -0.019 | 0.016 |
| rs10894670 | 11 | 133221987 | C | A | 0.010 | 0.002 | 0.007  | 0.013 | 0.020  | 0.017 | -0.008 | 0.017 |
| rs329651   | 11 | 133767622 | T | G | 0.016 | 0.002 | 0.019  | 0.016 | 0.014  | 0.021 | 0.026  | 0.021 |
| rs12364470 | 11 | 134601012 | G | T | 0.018 | 0.002 | 0.023  | 0.017 | 0.025  | 0.022 | 0.028  | 0.022 |
| rs11611246 | 12 | 939480    | T | G | 0.024 | 0.002 | 0.033  | 0.015 | 0.037  | 0.020 | 0.034  | 0.020 |
| rs2429150  | 12 | 2152655   | C | A | 0.011 | 0.002 | -0.014 | 0.013 | -0.010 | 0.016 | -0.017 | 0.016 |
| rs10744146 | 12 | 17212881  | G | A | 0.012 | 0.002 | -0.011 | 0.012 | -0.013 | 0.016 | -0.017 | 0.016 |
| rs621042   | 12 | 18789007  | C | A | 0.011 | 0.002 | -0.006 | 0.013 | -0.004 | 0.016 | -0.016 | 0.016 |
| rs10841188 | 12 | 19379693  | G | A | 0.013 | 0.002 | 0.019  | 0.014 | 0.002  | 0.018 | 0.027  | 0.018 |
| rs1584121  | 12 | 23559163  | G | A | 0.013 | 0.002 | -0.024 | 0.016 | -0.029 | 0.021 | -0.022 | 0.020 |
| rs7970953  | 12 | 24075508  | A | G | 0.014 | 0.002 | -0.017 | 0.014 | -0.046 | 0.018 | 0.007  | 0.017 |
| rs11052536 | 12 | 33371849  | T | C | 0.017 | 0.002 | -0.016 | 0.018 | -0.042 | 0.024 | 0.006  | 0.023 |
| rs11170468 | 12 | 39430048  | A | C | 0.012 | 0.002 | -0.012 | 0.015 | 0.003  | 0.019 | -0.027 | 0.019 |
| rs2733287  | 12 | 41880909  | C | A | 0.016 | 0.002 | 0.008  | 0.012 | 0.029  | 0.016 | -0.025 | 0.016 |
| rs2269828  | 12 | 47471439  | G | A | 0.011 | 0.002 | 0.002  | 0.014 | 0.005  | 0.017 | -0.008 | 0.017 |
| rs7975791  | 12 | 49413486  | C | T | 0.026 | 0.004 | -0.059 | 0.037 | -0.094 | 0.046 | -0.021 | 0.049 |
| rs7138803  | 12 | 50247468  | A | G | 0.030 | 0.002 | 0.017  | 0.013 | 0.015  | 0.017 | 0.019  | 0.016 |
| rs4077093  | 12 | 51593616  | T | G | 0.013 | 0.002 | -0.002 | 0.015 | -0.020 | 0.020 | 0.018  | 0.019 |
| rs7134628  | 12 | 53785861  | A | G | 0.017 | 0.003 | 0.021  | 0.021 | 0.025  | 0.027 | 0.013  | 0.026 |
| rs4759075  | 12 | 54667285  | T | C | 0.011 | 0.002 | 0.022  | 0.013 | 0.036  | 0.017 | 0.012  | 0.016 |
| rs2271189  | 12 | 56494991  | G | A | 0.014 | 0.002 | 0.000  | 0.013 | -0.017 | 0.017 | 0.012  | 0.016 |
| rs774211   | 12 | 56920939  | T | C | 0.014 | 0.002 | -0.005 | 0.017 | -0.024 | 0.022 | 0.009  | 0.021 |
| rs11173522 | 12 | 60953472  | A | C | 0.013 | 0.002 | -0.012 | 0.015 | -0.009 | 0.020 | -0.016 | 0.019 |
| rs1819844  | 12 | 68205604  | A | G | 0.014 | 0.002 | 0.006  | 0.016 | 0.009  | 0.021 | 0.009  | 0.021 |
| rs10878946 | 12 | 69642315  | C | T | 0.014 | 0.002 | 0.025  | 0.014 | 0.044  | 0.018 | 0.015  | 0.018 |
| rs11115176 | 12 | 82465797  | T | C | 0.012 | 0.002 | 0.012  | 0.015 | 0.032  | 0.019 | -0.007 | 0.019 |
| rs12299814 | 12 | 90216146  | C | A | 0.016 | 0.002 | -0.011 | 0.014 | -0.024 | 0.019 | 0.000  | 0.018 |
| rs2579106  | 12 | 90628230  | C | T | 0.014 | 0.002 | 0.024  | 0.014 | 0.034  | 0.018 | 0.011  | 0.018 |
| rs11105842 | 12 | 91243910  | G | A | 0.011 | 0.002 | -0.014 | 0.013 | -0.025 | 0.017 | -0.003 | 0.016 |
| rs10745785 | 12 | 97586257  | C | T | 0.011 | 0.002 | -0.007 | 0.013 | -0.022 | 0.017 | 0.014  | 0.017 |
| rs1420341  | 12 | 97913785  | C | T | 0.014 | 0.002 | 0.000  | 0.017 | -0.012 | 0.022 | 0.010  | 0.021 |
| rs7488867  | 12 | 103699685 | C | T | 0.020 | 0.002 | -0.011 | 0.014 | -0.025 | 0.018 | 0.008  | 0.018 |
| rs12316047 | 12 | 108393845 | G | A | 0.017 | 0.002 | -0.018 | 0.015 | -0.003 | 0.019 | -0.041 | 0.019 |
| rs17608150 | 12 | 110046698 | T | C | 0.020 | 0.003 | -0.019 | 0.024 | -0.008 | 0.031 | -0.042 | 0.030 |
| rs4766500  | 12 | 110993791 | G | A | 0.013 | 0.002 | 0.006  | 0.013 | 0.022  | 0.017 | -0.009 | 0.016 |
| rs11065987 | 12 | 112072424 | A | G | 0.012 | 0.002 | -0.078 | 0.013 | -0.089 | 0.017 | -0.072 | 0.016 |
| rs11066188 | 12 | 112610714 | G | A | 0.012 | 0.002 | -0.087 | 0.013 | -0.098 | 0.017 | -0.083 | 0.017 |
| rs739742   | 12 | 113184739 | A | C | 0.012 | 0.002 | -0.069 | 0.013 | -0.085 | 0.017 | -0.054 | 0.017 |
| rs4766710  | 12 | 114437708 | A | G | 0.023 | 0.004 | 0.009  | 0.025 | 0.051  | 0.033 | -0.029 | 0.032 |
| rs17709991 | 12 | 116065057 | C | T | 0.011 | 0.002 | 0.017  | 0.014 | 0.003  | 0.018 | 0.028  | 0.018 |
| rs7973955  | 12 | 118409640 | G | A | 0.013 | 0.002 | -0.013 | 0.014 | -0.005 | 0.018 | -0.018 | 0.017 |

|            |    |           |   |   |       |       |        |       |        |       |        |       |
|------------|----|-----------|---|---|-------|-------|--------|-------|--------|-------|--------|-------|
| rs3887080  | 12 | 121661966 | A | G | 0.018 | 0.003 | -0.017 | 0.019 | 0.009  | 0.025 | -0.032 | 0.024 |
| rs1169091  | 12 | 122462486 | C | T | 0.011 | 0.002 | 0.028  | 0.014 | 0.011  | 0.018 | 0.045  | 0.018 |
| rs12369179 | 12 | 122963550 | C | T | 0.036 | 0.003 | 0.023  | 0.022 | 0.035  | 0.029 | 0.035  | 0.028 |
| rs7133378  | 12 | 124409502 | A | G | 0.013 | 0.002 | -0.038 | 0.013 | -0.030 | 0.017 | -0.040 | 0.017 |
| rs11614340 | 12 | 133426483 | C | T | 0.013 | 0.002 | 0.005  | 0.013 | 0.031  | 0.017 | -0.017 | 0.017 |
| rs9507983  | 13 | 28620036  | C | T | 0.016 | 0.002 | -0.003 | 0.013 | -0.025 | 0.016 | 0.007  | 0.016 |
| rs1045411  | 13 | 31033232  | C | T | 0.015 | 0.002 | 0.004  | 0.014 | 0.004  | 0.019 | 0.005  | 0.018 |
| rs7332115  | 13 | 33147548  | T | G | 0.016 | 0.002 | -0.011 | 0.013 | -0.027 | 0.017 | -0.005 | 0.016 |
| rs1336486  | 13 | 40784814  | G | T | 0.014 | 0.002 | 0.014  | 0.013 | 0.026  | 0.017 | 0.002  | 0.017 |
| rs12429545 | 13 | 54102206  | A | G | 0.032 | 0.003 | -0.002 | 0.019 | 0.019  | 0.024 | -0.023 | 0.024 |
| rs7995015  | 13 | 54828961  | T | G | 0.013 | 0.002 | -0.004 | 0.014 | 0.003  | 0.018 | -0.011 | 0.017 |
| rs9527455  | 13 | 56465597  | C | A | 0.012 | 0.002 | -0.003 | 0.015 | -0.013 | 0.019 | 0.006  | 0.019 |
| rs9569808  | 13 | 58631525  | A | G | 0.019 | 0.002 | 0.017  | 0.015 | 0.011  | 0.019 | 0.015  | 0.019 |
| rs9538141  | 13 | 59178258  | A | G | 0.016 | 0.002 | 0.007  | 0.013 | 0.005  | 0.016 | 0.005  | 0.016 |
| rs9317219  | 13 | 62686518  | G | A | 0.010 | 0.002 | 0.000  | 0.013 | -0.009 | 0.016 | 0.007  | 0.016 |
| rs1304070  | 13 | 65479449  | A | G | 0.013 | 0.002 | -0.021 | 0.015 | -0.020 | 0.019 | -0.017 | 0.018 |
| rs9540493  | 13 | 66205704  | A | G | 0.014 | 0.002 | -0.011 | 0.013 | 0.010  | 0.017 | -0.025 | 0.016 |
| rs9571687  | 13 | 67472713  | C | A | 0.013 | 0.002 | -0.009 | 0.013 | -0.028 | 0.017 | 0.009  | 0.017 |
| rs629443   | 13 | 76386075  | T | G | 0.012 | 0.002 | 0.009  | 0.015 | -0.011 | 0.019 | 0.014  | 0.018 |
| rs1668633  | 13 | 78371890  | T | C | 0.010 | 0.002 | -0.005 | 0.013 | 0.006  | 0.016 | -0.006 | 0.016 |
| rs9530843  | 13 | 79563749  | A | C | 0.013 | 0.002 | -0.014 | 0.013 | -0.009 | 0.016 | -0.024 | 0.016 |
| rs9547153  | 13 | 85903717  | G | A | 0.010 | 0.002 | -0.004 | 0.013 | 0.008  | 0.016 | -0.007 | 0.016 |
| rs7331467  | 13 | 86540789  | A | G | 0.013 | 0.002 | 0.006  | 0.013 | 0.009  | 0.017 | -0.003 | 0.016 |
| rs2198679  | 13 | 89131240  | A | G | 0.011 | 0.002 | -0.005 | 0.012 | -0.009 | 0.016 | -0.003 | 0.016 |
| rs9302083  | 13 | 96374386  | T | C | 0.011 | 0.002 | -0.016 | 0.012 | 0.002  | 0.016 | -0.030 | 0.016 |
| rs1927790  | 13 | 96922191  | C | T | 0.015 | 0.002 | -0.005 | 0.013 | 0.016  | 0.016 | -0.023 | 0.016 |
| rs9634445  | 13 | 98123032  | A | G | 0.011 | 0.002 | 0.007  | 0.014 | 0.011  | 0.018 | 0.003  | 0.017 |
| rs7334078  | 13 | 99120484  | T | C | 0.012 | 0.002 | 0.031  | 0.014 | 0.032  | 0.018 | 0.026  | 0.018 |
| rs9514131  | 13 | 104090848 | G | T | 0.015 | 0.003 | 0.009  | 0.019 | 0.011  | 0.025 | 0.007  | 0.025 |
| rs2479958  | 13 | 111984244 | A | G | 0.015 | 0.002 | 0.010  | 0.013 | 0.024  | 0.017 | -0.008 | 0.016 |
| rs10132280 | 14 | 25928179  | C | A | 0.022 | 0.002 | -0.021 | 0.014 | -0.020 | 0.018 | -0.027 | 0.017 |
| rs12885454 | 14 | 29736838  | C | A | 0.019 | 0.002 | -0.006 | 0.013 | 0.016  | 0.017 | -0.023 | 0.017 |
| rs10483389 | 14 | 30495719  | T | C | 0.034 | 0.004 | -0.040 | 0.032 | 0.006  | 0.041 | -0.067 | 0.041 |
| rs17522122 | 14 | 33302882  | T | G | 0.016 | 0.002 | -0.008 | 0.013 | -0.008 | 0.017 | -0.013 | 0.016 |
| rs7144747  | 14 | 35637511  | G | A | 0.016 | 0.003 | 0.043  | 0.019 | 0.021  | 0.024 | 0.067  | 0.024 |
| rs1956151  | 14 | 40101060  | G | A | 0.013 | 0.002 | 0.039  | 0.016 | 0.054  | 0.020 | 0.013  | 0.020 |
| rs1955540  | 14 | 40801751  | C | T | 0.016 | 0.002 | 0.007  | 0.016 | 0.004  | 0.021 | 0.011  | 0.020 |
| rs8007908  | 14 | 46838144  | G | A | 0.011 | 0.002 | -0.004 | 0.012 | -0.001 | 0.016 | 0.002  | 0.016 |
| rs3007105  | 14 | 47367616  | T | C | 0.014 | 0.002 | -0.009 | 0.013 | -0.005 | 0.016 | -0.001 | 0.016 |
| rs217671   | 14 | 62360464  | G | A | 0.014 | 0.002 | -0.003 | 0.014 | -0.017 | 0.018 | 0.000  | 0.018 |
| rs4430672  | 14 | 63094407  | T | C | 0.013 | 0.002 | -0.016 | 0.016 | -0.006 | 0.020 | -0.032 | 0.020 |
| rs3902951  | 14 | 69789755  | G | T | 0.013 | 0.002 | -0.011 | 0.015 | 0.000  | 0.019 | -0.025 | 0.019 |
| rs1007934  | 14 | 73463479  | G | A | 0.012 | 0.002 | -0.009 | 0.013 | -0.012 | 0.016 | -0.003 | 0.016 |
| rs17105272 | 14 | 77529783  | T | C | 0.011 | 0.002 | -0.020 | 0.013 | -0.029 | 0.018 | -0.006 | 0.017 |
| rs10146527 | 14 | 79499850  | T | C | 0.014 | 0.002 | -0.002 | 0.013 | 0.011  | 0.017 | -0.003 | 0.016 |
| rs7144011  | 14 | 79940383  | T | G | 0.028 | 0.002 | 0.037  | 0.015 | 0.015  | 0.019 | 0.049  | 0.019 |
| rs12888545 | 14 | 88308044  | G | A | 0.014 | 0.002 | 0.056  | 0.015 | 0.095  | 0.019 | 0.024  | 0.018 |
| rs1951455  | 14 | 91512339  | C | T | 0.015 | 0.002 | -0.009 | 0.014 | -0.001 | 0.018 | -0.021 | 0.018 |
| rs9989141  | 14 | 94006257  | T | C | 0.016 | 0.002 | 0.003  | 0.013 | 0.003  | 0.017 | -0.001 | 0.016 |
| rs17096510 | 14 | 98616999  | A | C | 0.015 | 0.003 | -0.031 | 0.018 | -0.014 | 0.023 | -0.034 | 0.023 |
| rs4082793  | 14 | 99700080  | C | T | 0.012 | 0.002 | 0.002  | 0.013 | -0.005 | 0.016 | 0.008  | 0.016 |

|            |    |           |   |   |       |       |        |       |        |       |        |       |
|------------|----|-----------|---|---|-------|-------|--------|-------|--------|-------|--------|-------|
| rs12147845 | 14 | 101144596 | T | C | 0.020 | 0.003 | 0.036  | 0.020 | 0.011  | 0.025 | 0.057  | 0.025 |
| rs7147503  | 14 | 101539384 | C | T | 0.012 | 0.002 | 0.034  | 0.013 | 0.029  | 0.017 | 0.033  | 0.017 |
| rs10431745 | 14 | 102302372 | A | G | 0.020 | 0.003 | -0.004 | 0.025 | 0.010  | 0.033 | -0.036 | 0.031 |
| rs8016771  | 14 | 102649451 | G | T | 0.019 | 0.003 | -0.020 | 0.022 | -0.004 | 0.029 | -0.029 | 0.029 |
| rs3803286  | 14 | 103246470 | A | G | 0.018 | 0.002 | 0.017  | 0.013 | 0.006  | 0.017 | 0.036  | 0.017 |
| rs2010281  | 14 | 103862322 | G | A | 0.016 | 0.002 | 0.053  | 0.013 | 0.081  | 0.017 | 0.034  | 0.017 |
| rs4906908  | 15 | 27040082  | G | T | 0.010 | 0.002 | -0.019 | 0.013 | -0.019 | 0.016 | -0.017 | 0.016 |
| rs7172627  | 15 | 31877690  | G | A | 0.012 | 0.002 | 0.025  | 0.012 | 0.029  | 0.016 | 0.024  | 0.016 |
| rs8036040  | 15 | 36402716  | A | C | 0.011 | 0.002 | 0.006  | 0.012 | 0.014  | 0.016 | 0.005  | 0.016 |
| rs7178205  | 15 | 41971213  | A | G | 0.014 | 0.002 | -0.012 | 0.016 | 0.007  | 0.021 | -0.042 | 0.021 |
| rs12439798 | 15 | 46584787  | T | G | 0.013 | 0.002 | -0.004 | 0.012 | 0.007  | 0.016 | -0.011 | 0.016 |
| rs12899905 | 15 | 47142090  | C | T | 0.011 | 0.002 | -0.021 | 0.014 | -0.029 | 0.018 | -0.012 | 0.018 |
| rs1912631  | 15 | 47914691  | G | A | 0.012 | 0.002 | -0.032 | 0.013 | -0.026 | 0.016 | -0.040 | 0.016 |
| rs3736485  | 15 | 51748610  | A | G | 0.013 | 0.002 | 0.011  | 0.013 | 0.014  | 0.016 | 0.009  | 0.016 |
| rs2414128  | 15 | 52369728  | T | C | 0.012 | 0.002 | 0.023  | 0.013 | 0.020  | 0.017 | 0.024  | 0.016 |
| rs16965225 | 15 | 53143170  | T | G | 0.022 | 0.003 | 0.007  | 0.025 | -0.011 | 0.032 | 0.018  | 0.032 |
| rs10163018 | 15 | 53525415  | C | T | 0.011 | 0.002 | 0.006  | 0.013 | 0.011  | 0.017 | 0.001  | 0.016 |
| rs17236194 | 15 | 59002755  | C | T | 0.015 | 0.002 | 0.018  | 0.018 | 0.015  | 0.024 | 0.017  | 0.023 |
| rs340025   | 15 | 60908307  | C | T | 0.012 | 0.002 | 0.014  | 0.013 | 0.032  | 0.016 | 0.006  | 0.016 |
| rs7162238  | 15 | 61447827  | A | G | 0.011 | 0.002 | 0.021  | 0.013 | 0.016  | 0.016 | 0.031  | 0.016 |
| rs12595158 | 15 | 62316035  | C | T | 0.039 | 0.005 | 0.090  | 0.045 | 0.063  | 0.059 | 0.086  | 0.057 |
| rs11635675 | 15 | 63793238  | T | G | 0.012 | 0.002 | -0.028 | 0.013 | -0.029 | 0.017 | -0.023 | 0.017 |
| rs17200912 | 15 | 66730307  | C | T | 0.015 | 0.002 | -0.008 | 0.015 | -0.001 | 0.019 | -0.004 | 0.019 |
| rs13329567 | 15 | 68104367  | C | T | 0.029 | 0.002 | 0.001  | 0.015 | 0.006  | 0.019 | -0.001 | 0.019 |
| rs7164727  | 15 | 73093991  | T | C | 0.018 | 0.002 | -0.017 | 0.013 | -0.004 | 0.017 | -0.027 | 0.017 |
| rs11630240 | 15 | 73645403  | G | A | 0.024 | 0.003 | 0.003  | 0.024 | 0.018  | 0.031 | -0.016 | 0.030 |
| rs5742914  | 15 | 74286929  | T | C | 0.018 | 0.003 | -0.016 | 0.020 | -0.010 | 0.025 | -0.021 | 0.025 |
| rs936227   | 15 | 75131959  | G | A | 0.012 | 0.002 | 0.008  | 0.013 | 0.011  | 0.016 | 0.012  | 0.016 |
| rs1829130  | 15 | 76107730  | C | T | 0.011 | 0.002 | 0.007  | 0.013 | 0.007  | 0.017 | 0.007  | 0.017 |
| rs11855853 | 15 | 78012618  | C | T | 0.015 | 0.002 | -0.013 | 0.014 | 0.002  | 0.018 | -0.021 | 0.018 |
| rs12595749 | 15 | 79432359  | A | G | 0.014 | 0.002 | -0.009 | 0.013 | -0.025 | 0.016 | 0.011  | 0.016 |
| rs12593036 | 15 | 81058652  | A | G | 0.015 | 0.002 | 0.014  | 0.014 | 0.022  | 0.018 | 0.010  | 0.017 |
| rs12906208 | 15 | 92571691  | G | A | 0.013 | 0.002 | 0.015  | 0.015 | 0.048  | 0.020 | -0.011 | 0.019 |
| rs7181498  | 15 | 95271404  | T | C | 0.016 | 0.002 | 0.011  | 0.013 | 0.001  | 0.017 | 0.023  | 0.016 |
| rs1021985  | 15 | 98285658  | G | A | 0.011 | 0.002 | -0.026 | 0.013 | -0.030 | 0.017 | -0.025 | 0.016 |
| rs2715423  | 15 | 99511873  | G | A | 0.012 | 0.002 | -0.019 | 0.014 | -0.035 | 0.018 | 0.002  | 0.018 |
| rs11866815 | 16 | 387867    | C | T | 0.016 | 0.002 | -0.003 | 0.014 | -0.006 | 0.019 | -0.011 | 0.018 |
| rs2516739  | 16 | 2097158   | G | A | 0.016 | 0.002 | 0.015  | 0.016 | 0.048  | 0.020 | -0.009 | 0.020 |
| rs12448257 | 16 | 3599655   | A | G | 0.018 | 0.002 | -0.026 | 0.015 | 0.004  | 0.020 | -0.046 | 0.020 |
| rs879620   | 16 | 4015729   | T | C | 0.023 | 0.002 | -0.032 | 0.013 | -0.038 | 0.017 | -0.029 | 0.017 |
| rs1876359  | 16 | 4930100   | T | C | 0.013 | 0.002 | 0.024  | 0.013 | 0.032  | 0.017 | 0.008  | 0.016 |
| rs12149756 | 16 | 6728603   | G | A | 0.013 | 0.002 | -0.022 | 0.014 | -0.030 | 0.019 | -0.023 | 0.018 |
| rs249292   | 16 | 9412804   | T | C | 0.012 | 0.002 | 0.014  | 0.013 | -0.001 | 0.017 | 0.022  | 0.017 |
| rs1990573  | 16 | 9713688   | G | A | 0.013 | 0.002 | -0.017 | 0.013 | 0.002  | 0.017 | -0.035 | 0.017 |
| rs4985155  | 16 | 15129459  | A | G | 0.012 | 0.002 | -0.054 | 0.013 | -0.044 | 0.017 | -0.070 | 0.017 |
| rs12446632 | 16 | 19935389  | G | A | 0.035 | 0.002 | 0.021  | 0.018 | 0.037  | 0.023 | 0.023  | 0.022 |
| rs9931967  | 16 | 20375351  | T | G | 0.016 | 0.002 | -0.013 | 0.013 | 0.002  | 0.016 | -0.025 | 0.016 |
| rs2023671  | 16 | 23849839  | G | T | 0.012 | 0.002 | -0.062 | 0.014 | -0.046 | 0.019 | -0.079 | 0.018 |
| rs7195386  | 16 | 24578458  | T | C | 0.013 | 0.002 | -0.027 | 0.012 | -0.038 | 0.016 | -0.024 | 0.016 |
| rs2726039  | 16 | 28327463  | G | A | 0.019 | 0.002 | 0.063  | 0.013 | 0.071  | 0.017 | 0.049  | 0.017 |
| rs7498665  | 16 | 28883241  | G | A | 0.027 | 0.002 | 0.097  | 0.013 | 0.115  | 0.017 | 0.073  | 0.016 |

|            |    |          |   |   |       |       |        |       |        |       |        |       |
|------------|----|----------|---|---|-------|-------|--------|-------|--------|-------|--------|-------|
| rs3814883  | 16 | 29994922 | T | C | 0.023 | 0.002 | -0.011 | 0.013 | -0.016 | 0.017 | -0.006 | 0.016 |
| rs1557672  | 16 | 30510571 | C | T | 0.011 | 0.002 | 0.032  | 0.014 | 0.016  | 0.018 | 0.048  | 0.018 |
| rs4889606  | 16 | 31011183 | A | G | 0.020 | 0.002 | 0.002  | 0.013 | 0.002  | 0.017 | -0.004 | 0.016 |
| rs2080454  | 16 | 49062590 | C | A | 0.013 | 0.002 | -0.010 | 0.013 | -0.004 | 0.017 | -0.017 | 0.016 |
| rs10852521 | 16 | 53804965 | C | T | 0.064 | 0.002 | 0.017  | 0.012 | 0.031  | 0.016 | 0.003  | 0.016 |
| rs12448738 | 16 | 56489343 | C | A | 0.017 | 0.003 | -0.008 | 0.018 | 0.003  | 0.023 | -0.025 | 0.023 |
| rs11075489 | 16 | 62803841 | C | T | 0.011 | 0.002 | 0.011  | 0.012 | 0.016  | 0.016 | 0.012  | 0.016 |
| rs7200919  | 16 | 67316600 | A | G | 0.010 | 0.002 | 0.028  | 0.013 | 0.025  | 0.017 | 0.029  | 0.016 |
| rs2307022  | 16 | 68381978 | A | G | 0.014 | 0.002 | -0.010 | 0.013 | 0.017  | 0.017 | -0.023 | 0.017 |
| rs244418   | 16 | 69622762 | G | A | 0.021 | 0.002 | 0.019  | 0.013 | 0.021  | 0.016 | 0.018  | 0.016 |
| rs7919     | 16 | 70514828 | C | A | 0.016 | 0.002 | 0.036  | 0.013 | 0.053  | 0.016 | 0.022  | 0.016 |
| rs11643673 | 16 | 71353719 | A | G | 0.011 | 0.002 | 0.015  | 0.013 | -0.006 | 0.017 | 0.032  | 0.016 |
| rs811054   | 16 | 72251132 | T | C | 0.014 | 0.002 | -0.015 | 0.013 | -0.030 | 0.016 | 0.000  | 0.016 |
| rs756717   | 16 | 72996162 | G | A | 0.015 | 0.002 | -0.020 | 0.013 | -0.017 | 0.017 | -0.027 | 0.017 |
| rs1125804  | 16 | 74148932 | G | A | 0.011 | 0.002 | 0.011  | 0.013 | 0.007  | 0.016 | 0.006  | 0.016 |
| rs6564360  | 16 | 76779612 | G | A | 0.014 | 0.002 | 0.007  | 0.016 | 0.007  | 0.020 | -0.005 | 0.020 |
| rs2012502  | 16 | 81728081 | A | C | 0.011 | 0.002 | 0.022  | 0.013 | 0.027  | 0.017 | 0.010  | 0.017 |
| rs11150463 | 16 | 82452519 | C | A | 0.012 | 0.002 | -0.001 | 0.013 | 0.029  | 0.017 | -0.025 | 0.016 |
| rs10492861 | 16 | 82866767 | T | G | 0.012 | 0.002 | 0.060  | 0.014 | 0.106  | 0.018 | 0.008  | 0.018 |
| rs4516268  | 17 | 1846831  | C | A | 0.022 | 0.002 | -0.018 | 0.017 | 0.012  | 0.021 | -0.045 | 0.021 |
| rs9904177  | 17 | 4755424  | G | A | 0.012 | 0.002 | -0.024 | 0.014 | 0.002  | 0.018 | -0.052 | 0.018 |
| rs1000940  | 17 | 5283252  | G | A | 0.015 | 0.002 | -0.008 | 0.014 | 0.015  | 0.017 | -0.032 | 0.017 |
| rs17681708 | 17 | 9792872  | C | T | 0.011 | 0.002 | 0.011  | 0.013 | -0.005 | 0.017 | 0.024  | 0.017 |
| rs1075901  | 17 | 15943910 | C | T | 0.012 | 0.002 | 0.009  | 0.012 | 0.002  | 0.016 | 0.010  | 0.016 |
| rs4986044  | 17 | 21261560 | C | T | 0.016 | 0.002 | 0.011  | 0.013 | 0.021  | 0.017 | 0.005  | 0.016 |
| rs11080090 | 17 | 27502029 | G | A | 0.013 | 0.002 | 0.005  | 0.018 | -0.012 | 0.023 | 0.018  | 0.023 |
| rs1038088  | 17 | 28074563 | G | T | 0.012 | 0.002 | 0.014  | 0.012 | -0.010 | 0.016 | 0.032  | 0.016 |
| rs3930349  | 17 | 31475545 | C | A | 0.014 | 0.002 | -0.017 | 0.015 | -0.026 | 0.019 | -0.017 | 0.019 |
| rs12150665 | 17 | 34914787 | T | C | 0.016 | 0.002 | 0.033  | 0.013 | 0.015  | 0.016 | 0.049  | 0.016 |
| rs8070454  | 17 | 38160754 | C | T | 0.010 | 0.002 | 0.073  | 0.013 | 0.072  | 0.017 | 0.079  | 0.016 |
| rs16966801 | 17 | 39573713 | G | A | 0.016 | 0.002 | 0.007  | 0.016 | 0.009  | 0.020 | 0.019  | 0.020 |
| rs17599948 | 17 | 41353410 | A | G | 0.013 | 0.002 | -0.007 | 0.017 | 0.003  | 0.022 | -0.015 | 0.021 |
| rs9901595  | 17 | 42305699 | A | G | 0.012 | 0.002 | -0.043 | 0.013 | -0.071 | 0.017 | -0.019 | 0.017 |
| rs208015   | 17 | 46252346 | T | C | 0.036 | 0.003 | 0.004  | 0.024 | -0.035 | 0.032 | 0.033  | 0.031 |
| rs11079849 | 17 | 47090785 | C | T | 0.019 | 0.002 | 0.000  | 0.013 | 0.008  | 0.017 | -0.004 | 0.017 |
| rs8071182  | 17 | 53336155 | A | G | 0.013 | 0.002 | -0.008 | 0.017 | 0.033  | 0.021 | -0.027 | 0.022 |
| rs11649864 | 17 | 56093061 | A | G | 0.018 | 0.003 | -0.055 | 0.022 | -0.070 | 0.030 | -0.040 | 0.028 |
| rs8075273  | 17 | 61728881 | C | A | 0.013 | 0.002 | -0.017 | 0.014 | -0.001 | 0.018 | -0.038 | 0.017 |
| rs12602912 | 17 | 65870073 | T | C | 0.018 | 0.002 | -0.028 | 0.016 | -0.005 | 0.020 | -0.049 | 0.020 |
| rs2619976  | 17 | 71754545 | T | C | 0.010 | 0.002 | 0.019  | 0.013 | 0.020  | 0.017 | 0.024  | 0.016 |
| rs7209235  | 17 | 73759552 | G | A | 0.011 | 0.002 | -0.049 | 0.014 | -0.062 | 0.018 | -0.042 | 0.018 |
| rs8081039  | 17 | 75995829 | T | C | 0.023 | 0.004 | 0.039  | 0.026 | 0.014  | 0.034 | 0.049  | 0.034 |
| rs1696757  | 17 | 77800743 | A | G | 0.010 | 0.002 | -0.011 | 0.013 | -0.010 | 0.016 | -0.011 | 0.016 |
| rs12939549 | 17 | 78611724 | A | G | 0.018 | 0.002 | 0.003  | 0.012 | 0.005  | 0.016 | 0.000  | 0.016 |
| rs7210438  | 17 | 79060180 | T | C | 0.014 | 0.002 | -0.014 | 0.015 | -0.021 | 0.019 | -0.007 | 0.019 |
| rs11658335 | 17 | 80084821 | C | T | 0.010 | 0.002 | -0.009 | 0.013 | -0.010 | 0.016 | -0.005 | 0.016 |
| rs1608445  | 18 | 947954   | G | A | 0.010 | 0.002 | -0.002 | 0.013 | 0.008  | 0.016 | -0.011 | 0.016 |
| rs8097544  | 18 | 1839564  | G | A | 0.020 | 0.003 | -0.028 | 0.018 | -0.056 | 0.023 | -0.002 | 0.022 |
| rs12964689 | 18 | 21116998 | A | G | 0.020 | 0.002 | 0.019  | 0.012 | 0.030  | 0.016 | 0.007  | 0.016 |
| rs16940823 | 18 | 22137319 | C | A | 0.015 | 0.002 | -0.014 | 0.016 | -0.006 | 0.021 | -0.021 | 0.021 |
| rs1941697  | 18 | 31251276 | A | G | 0.012 | 0.002 | 0.009  | 0.012 | 0.022  | 0.016 | -0.008 | 0.016 |

|            |    |          |   |   |       |       |        |       |        |       |        |       |
|------------|----|----------|---|---|-------|-------|--------|-------|--------|-------|--------|-------|
| rs1365466  | 18 | 36182440 | C | T | 0.014 | 0.002 | 0.013  | 0.014 | 0.014  | 0.018 | 0.012  | 0.018 |
| rs559231   | 18 | 39644247 | T | G | 0.014 | 0.002 | 0.004  | 0.013 | -0.002 | 0.017 | 0.006  | 0.016 |
| rs7239883  | 18 | 40147671 | G | A | 0.013 | 0.002 | 0.016  | 0.013 | 0.014  | 0.016 | 0.008  | 0.016 |
| rs1158805  | 18 | 40736590 | C | A | 0.014 | 0.002 | -0.010 | 0.013 | -0.029 | 0.016 | -0.005 | 0.016 |
| rs954018   | 18 | 42598463 | G | A | 0.013 | 0.002 | -0.009 | 0.014 | -0.025 | 0.017 | 0.007  | 0.017 |
| rs10438964 | 18 | 42950629 | C | T | 0.013 | 0.002 | -0.006 | 0.014 | -0.033 | 0.018 | 0.019  | 0.018 |
| rs7239114  | 18 | 45921214 | A | G | 0.012 | 0.002 | -0.014 | 0.013 | -0.035 | 0.017 | -0.007 | 0.017 |
| rs9964756  | 18 | 50441817 | G | T | 0.016 | 0.003 | 0.018  | 0.020 | 0.004  | 0.026 | 0.030  | 0.026 |
| rs12607207 | 18 | 51560823 | C | T | 0.012 | 0.002 | -0.028 | 0.014 | -0.017 | 0.018 | -0.041 | 0.018 |
| rs8092503  | 18 | 52479487 | G | A | 0.017 | 0.002 | -0.027 | 0.015 | -0.015 | 0.019 | -0.028 | 0.019 |
| rs7243357  | 18 | 56883319 | T | G | 0.019 | 0.002 | -0.044 | 0.016 | -0.079 | 0.021 | -0.020 | 0.021 |
| rs663129   | 18 | 57838401 | A | G | 0.055 | 0.002 | 0.005  | 0.015 | 0.031  | 0.019 | -0.012 | 0.019 |
| rs8096899  | 18 | 58094046 | G | T | 0.040 | 0.004 | -0.041 | 0.031 | -0.013 | 0.040 | -0.068 | 0.040 |
| rs1426284  | 18 | 58738938 | A | G | 0.037 | 0.005 | -0.039 | 0.035 | -0.020 | 0.046 | -0.067 | 0.045 |
| rs7235205  | 18 | 63373762 | G | A | 0.014 | 0.002 | 0.014  | 0.014 | 0.016  | 0.018 | 0.006  | 0.018 |
| rs12604935 | 18 | 69233570 | C | A | 0.011 | 0.002 | 0.027  | 0.013 | 0.030  | 0.017 | 0.033  | 0.016 |
| rs11150911 | 18 | 73498528 | A | C | 0.013 | 0.002 | 0.012  | 0.014 | -0.007 | 0.018 | 0.026  | 0.017 |
| rs673429   | 18 | 76743413 | T | C | 0.024 | 0.004 | 0.015  | 0.027 | -0.009 | 0.035 | 0.042  | 0.034 |
| rs3957285  | 19 | 1891992  | A | G | 0.014 | 0.002 | -0.010 | 0.013 | -0.016 | 0.017 | -0.007 | 0.016 |
| rs350832   | 19 | 4069426  | A | G | 0.018 | 0.002 | -0.047 | 0.015 | -0.076 | 0.020 | -0.026 | 0.020 |
| rs243387   | 19 | 4445156  | G | A | 0.010 | 0.002 | -0.004 | 0.012 | -0.013 | 0.016 | 0.004  | 0.016 |
| rs12609744 | 19 | 12994140 | C | T | 0.013 | 0.002 | -0.029 | 0.014 | -0.022 | 0.018 | -0.038 | 0.018 |
| rs17724992 | 19 | 18454825 | A | G | 0.018 | 0.002 | 0.017  | 0.014 | 0.026  | 0.018 | 0.022  | 0.018 |
| rs709679   | 19 | 18726856 | T | C | 0.010 | 0.002 | 0.001  | 0.013 | 0.005  | 0.016 | 0.003  | 0.016 |
| rs998732   | 19 | 19378671 | A | G | 0.017 | 0.002 | -0.043 | 0.017 | -0.037 | 0.021 | -0.064 | 0.021 |
| rs17513613 | 19 | 30286822 | C | T | 0.019 | 0.002 | -0.006 | 0.013 | 0.000  | 0.017 | -0.020 | 0.017 |
| rs11084553 | 19 | 31019780 | A | G | 0.021 | 0.002 | -0.018 | 0.018 | 0.006  | 0.023 | -0.037 | 0.022 |
| rs10408013 | 19 | 33963766 | T | C | 0.011 | 0.002 | 0.011  | 0.014 | 0.031  | 0.018 | -0.007 | 0.017 |
| rs29941    | 19 | 34309532 | G | A | 0.015 | 0.002 | 0.003  | 0.013 | 0.004  | 0.017 | 0.004  | 0.017 |
| rs3826705  | 19 | 42637232 | C | T | 0.016 | 0.003 | 0.028  | 0.019 | 0.019  | 0.025 | 0.043  | 0.024 |
| rs2075650  | 19 | 45395619 | A | G | 0.024 | 0.002 | -0.020 | 0.019 | -0.017 | 0.024 | -0.008 | 0.024 |
| rs11672660 | 19 | 46180184 | C | T | 0.034 | 0.002 | 0.019  | 0.016 | 0.021  | 0.021 | 0.027  | 0.020 |
| rs3810291  | 19 | 47569003 | A | G | 0.027 | 0.002 | -0.025 | 0.013 | 0.006  | 0.017 | -0.060 | 0.017 |
| rs11670142 | 19 | 49650471 | G | T | 0.011 | 0.002 | 0.014  | 0.013 | 0.021  | 0.016 | 0.015  | 0.016 |
| rs4802778  | 19 | 51812034 | G | A | 0.012 | 0.002 | -0.014 | 0.013 | -0.029 | 0.017 | -0.005 | 0.016 |
| rs1884389  | 20 | 1410582  | C | T | 0.010 | 0.002 | 0.012  | 0.013 | 0.012  | 0.016 | 0.005  | 0.016 |
| rs4813619  | 20 | 2815715  | G | T | 0.011 | 0.002 | -0.014 | 0.012 | -0.012 | 0.016 | -0.017 | 0.016 |
| rs1884897  | 20 | 6612832  | G | A | 0.019 | 0.002 | 0.017  | 0.013 | 0.019  | 0.016 | 0.011  | 0.016 |
| rs2719771  | 20 | 8313607  | C | A | 0.012 | 0.002 | -0.009 | 0.014 | -0.008 | 0.018 | -0.002 | 0.018 |
| rs2876248  | 20 | 12700157 | T | C | 0.011 | 0.002 | 0.006  | 0.013 | 0.011  | 0.017 | -0.005 | 0.017 |
| rs17272434 | 20 | 15085365 | G | A | 0.011 | 0.002 | 0.019  | 0.013 | 0.005  | 0.017 | 0.027  | 0.017 |
| rs8123881  | 20 | 15819495 | G | A | 0.020 | 0.002 | -0.015 | 0.019 | -0.014 | 0.024 | -0.021 | 0.024 |
| rs4814512  | 20 | 16564210 | A | C | 0.013 | 0.002 | -0.017 | 0.015 | -0.011 | 0.019 | -0.029 | 0.019 |
| rs852056   | 20 | 17102860 | T | C | 0.013 | 0.002 | -0.024 | 0.014 | -0.003 | 0.019 | -0.043 | 0.018 |
| rs1409818  | 20 | 21381121 | T | C | 0.020 | 0.003 | 0.008  | 0.020 | -0.015 | 0.027 | 0.033  | 0.026 |
| rs6050446  | 20 | 25195509 | G | A | 0.034 | 0.005 | 0.110  | 0.036 | 0.182  | 0.048 | 0.026  | 0.045 |
| rs7260957  | 20 | 25722462 | C | T | 0.013 | 0.002 | -0.015 | 0.016 | 0.017  | 0.021 | -0.035 | 0.021 |
| rs3813922  | 20 | 30777336 | T | G | 0.014 | 0.002 | 0.011  | 0.017 | 0.030  | 0.022 | -0.013 | 0.022 |
| rs4012234  | 20 | 32553047 | G | T | 0.014 | 0.002 | 0.002  | 0.013 | -0.011 | 0.016 | 0.012  | 0.016 |
| rs4911442  | 20 | 33355046 | A | G | 0.015 | 0.002 | 0.000  | 0.019 | 0.001  | 0.025 | -0.012 | 0.024 |
| rs1474976  | 20 | 34732372 | A | C | 0.017 | 0.003 | 0.012  | 0.022 | 0.038  | 0.028 | -0.011 | 0.028 |

Waist-to-hip ratio

|            |    |           |   |   |       |       |        |       |        |       |        |       |
|------------|----|-----------|---|---|-------|-------|--------|-------|--------|-------|--------|-------|
| rs4812405  | 20 | 35276585  | C | A | 0.020 | 0.003 | -0.007 | 0.025 | -0.012 | 0.032 | -0.020 | 0.031 |
| rs2143253  | 20 | 41987392  | G | A | 0.019 | 0.003 | 0.025  | 0.019 | 0.037  | 0.024 | 0.024  | 0.024 |
| rs2868202  | 20 | 43428832  | C | T | 0.011 | 0.002 | 0.024  | 0.014 | 0.017  | 0.018 | 0.026  | 0.018 |
| rs2425840  | 20 | 44904838  | C | A | 0.012 | 0.002 | 0.021  | 0.013 | 0.026  | 0.016 | 0.012  | 0.016 |
| rs6019482  | 20 | 47495560  | C | T | 0.018 | 0.002 | 0.000  | 0.017 | 0.040  | 0.022 | -0.027 | 0.022 |
| rs2143624  | 20 | 49781718  | A | G | 0.010 | 0.002 | 0.025  | 0.013 | 0.018  | 0.017 | 0.032  | 0.016 |
| rs17806379 | 20 | 51107290  | C | T | 0.026 | 0.002 | 0.014  | 0.016 | 0.025  | 0.021 | 0.001  | 0.021 |
| rs6023633  | 20 | 53453850  | G | A | 0.014 | 0.002 | -0.011 | 0.015 | -0.014 | 0.019 | -0.013 | 0.019 |
| rs6014523  | 20 | 54394975  | T | C | 0.015 | 0.002 | -0.014 | 0.016 | -0.037 | 0.020 | 0.007  | 0.020 |
| rs2427453  | 20 | 61577515  | T | C | 0.011 | 0.002 | -0.023 | 0.013 | -0.021 | 0.016 | -0.029 | 0.016 |
| rs310618   | 20 | 62127121  | C | T | 0.011 | 0.002 | 0.030  | 0.014 | 0.049  | 0.018 | 0.013  | 0.018 |
| rs6090041  | 20 | 62712676  | A | G | 0.012 | 0.002 | 0.019  | 0.014 | 0.001  | 0.018 | 0.033  | 0.018 |
| rs2832283  | 21 | 30690558  | A | G | 0.012 | 0.002 | 0.019  | 0.015 | 0.029  | 0.020 | 0.007  | 0.019 |
| rs762147   | 21 | 39238610  | G | A | 0.012 | 0.002 | -0.007 | 0.014 | 0.016  | 0.018 | -0.032 | 0.018 |
| rs2836754  | 21 | 40291740  | C | T | 0.014 | 0.002 | -0.057 | 0.013 | -0.060 | 0.017 | -0.055 | 0.016 |
| rs2836961  | 21 | 40627020  | C | A | 0.010 | 0.002 | 0.001  | 0.013 | 0.004  | 0.017 | -0.001 | 0.016 |
| rs1964927  | 21 | 42653237  | G | A | 0.012 | 0.002 | 0.019  | 0.013 | 0.050  | 0.017 | -0.002 | 0.017 |
| rs427943   | 21 | 46570896  | C | A | 0.017 | 0.002 | 0.022  | 0.013 | 0.019  | 0.016 | 0.018  | 0.016 |
| rs11538    | 22 | 18220831  | G | A | 0.014 | 0.002 | -0.012 | 0.017 | 0.006  | 0.022 | -0.025 | 0.021 |
| rs175165   | 22 | 20116015  | T | G | 0.010 | 0.002 | -0.013 | 0.013 | -0.009 | 0.017 | -0.025 | 0.016 |
| rs12628891 | 22 | 38317137  | C | T | 0.011 | 0.002 | 0.003  | 0.014 | -0.014 | 0.018 | 0.018  | 0.017 |
| rs11089885 | 22 | 38809485  | C | T | 0.010 | 0.002 | -0.004 | 0.013 | -0.007 | 0.016 | 0.001  | 0.016 |
| rs738140   | 22 | 41884954  | A | G | 0.014 | 0.002 | 0.015  | 0.014 | 0.032  | 0.017 | -0.001 | 0.017 |
| rs5751239  | 22 | 42592239  | T | C | 0.011 | 0.002 | 0.020  | 0.012 | 0.023  | 0.016 | 0.015  | 0.016 |
| rs9615905  | 22 | 48875699  | T | C | 0.011 | 0.002 | 0.045  | 0.013 | 0.026  | 0.016 | 0.052  | 0.016 |
| rs7525092  | 1  | 1810090   | C | T | 0.012 | 0.002 | -0.043 | 0.014 | -0.035 | 0.018 | -0.043 | 0.018 |
| rs2742690  | 1  | 2987268   | A | C | 0.017 | 0.003 | 0.022  | 0.017 | 0.017  | 0.021 | 0.006  | 0.021 |
| rs6688233  | 1  | 9335745   | T | C | 0.019 | 0.002 | -0.022 | 0.015 | -0.031 | 0.019 | -0.024 | 0.019 |
| rs12024554 | 1  | 19925759  | C | T | 0.015 | 0.002 | 0.000  | 0.015 | -0.002 | 0.019 | 0.003  | 0.019 |
| rs2298632  | 1  | 23710475  | C | T | 0.014 | 0.002 | 0.006  | 0.013 | 0.001  | 0.017 | 0.017  | 0.016 |
| rs213637   | 1  | 26188625  | T | G | 0.013 | 0.002 | -0.010 | 0.013 | -0.002 | 0.016 | -0.010 | 0.016 |
| rs4660808  | 1  | 40018509  | T | C | 0.015 | 0.002 | 0.027  | 0.015 | 0.050  | 0.019 | -0.001 | 0.019 |
| rs41286710 | 1  | 46383020  | C | T | 0.026 | 0.005 | -0.027 | 0.031 | -0.011 | 0.040 | -0.039 | 0.039 |
| rs7531656  | 1  | 49828663  | A | G | 0.016 | 0.002 | -0.050 | 0.013 | -0.044 | 0.017 | -0.054 | 0.017 |
| rs4593876  | 1  | 50389102  | T | C | 0.016 | 0.002 | -0.049 | 0.013 | -0.043 | 0.017 | -0.054 | 0.017 |
| rs2481665  | 1  | 62594677  | T | C | 0.011 | 0.002 | -0.006 | 0.013 | 0.011  | 0.016 | -0.017 | 0.016 |
| rs11208660 | 1  | 65983626  | T | C | 0.023 | 0.003 | 0.004  | 0.022 | -0.009 | 0.029 | 0.021  | 0.028 |
| rs2815749  | 1  | 72814783  | G | A | 0.017 | 0.002 | 0.019  | 0.016 | 0.014  | 0.021 | 0.008  | 0.020 |
| rs313732   | 1  | 86258603  | G | A | 0.012 | 0.002 | 0.005  | 0.013 | 0.018  | 0.016 | -0.001 | 0.016 |
| rs6699397  | 1  | 91212216  | G | A | 0.012 | 0.002 | 0.017  | 0.013 | 0.012  | 0.017 | 0.016  | 0.016 |
| rs9659380  | 1  | 98423149  | G | A | 0.018 | 0.002 | -0.014 | 0.017 | -0.008 | 0.022 | -0.013 | 0.022 |
| rs2889351  | 1  | 103543532 | T | C | 0.015 | 0.002 | -0.005 | 0.013 | 0.002  | 0.016 | -0.010 | 0.016 |
| rs2335077  | 1  | 107573565 | G | A | 0.012 | 0.002 | -0.047 | 0.013 | -0.028 | 0.017 | -0.056 | 0.017 |
| rs17024393 | 1  | 110154688 | C | T | 0.030 | 0.005 | -0.057 | 0.039 | -0.058 | 0.050 | -0.055 | 0.049 |
| rs6658723  | 1  | 112274162 | T | C | 0.015 | 0.002 | -0.006 | 0.013 | -0.010 | 0.017 | -0.003 | 0.016 |
| rs3789615  | 1  | 114941326 | C | T | 0.013 | 0.002 | 0.006  | 0.013 | 0.001  | 0.016 | 0.015  | 0.016 |
| rs10923724 | 1  | 119546842 | T | C | 0.024 | 0.002 | -0.013 | 0.013 | -0.007 | 0.016 | -0.023 | 0.016 |
| rs905938   | 1  | 154991389 | T | C | 0.013 | 0.002 | -0.037 | 0.014 | -0.036 | 0.019 | -0.037 | 0.018 |
| rs61813324 | 1  | 156049877 | T | C | 0.019 | 0.003 | -0.012 | 0.020 | -0.014 | 0.026 | -0.013 | 0.026 |
| rs1535572  | 1  | 163649901 | C | T | 0.012 | 0.002 | 0.005  | 0.013 | 0.015  | 0.016 | -0.010 | 0.016 |
| rs10919388 | 1  | 170372503 | C | A | 0.027 | 0.002 | -0.021 | 0.014 | -0.020 | 0.018 | -0.016 | 0.018 |



|            |   |           |   |   |       |       |        |       |        |       |        |       |
|------------|---|-----------|---|---|-------|-------|--------|-------|--------|-------|--------|-------|
| rs2301453  | 1 | 172358167 | G | A | 0.022 | 0.002 | 0.003  | 0.013 | 0.002  | 0.016 | 0.010  | 0.016 |
| rs28680958 | 1 | 173848808 | G | A | 0.014 | 0.002 | 0.006  | 0.015 | -0.006 | 0.019 | 0.011  | 0.019 |
| rs543874   | 1 | 177889480 | G | A | 0.020 | 0.002 | -0.027 | 0.016 | -0.004 | 0.020 | -0.045 | 0.020 |
| rs3828112  | 1 | 200042031 | T | C | 0.012 | 0.002 | 0.009  | 0.014 | 0.034  | 0.017 | -0.014 | 0.017 |
| rs1572993  | 1 | 205045087 | A | G | 0.013 | 0.002 | 0.012  | 0.013 | 0.020  | 0.016 | -0.001 | 0.016 |
| rs17015701 | 1 | 210337691 | A | G | 0.012 | 0.002 | 0.015  | 0.015 | -0.017 | 0.020 | 0.043  | 0.020 |
| rs3767848  | 1 | 214173840 | G | A | 0.012 | 0.002 | -0.030 | 0.014 | -0.041 | 0.019 | -0.022 | 0.018 |
| rs1563355  | 1 | 219653101 | C | T | 0.028 | 0.002 | -0.022 | 0.013 | -0.006 | 0.017 | -0.036 | 0.017 |
| rs6604731  | 1 | 224051439 | C | T | 0.012 | 0.002 | 0.021  | 0.014 | 0.032  | 0.018 | 0.009  | 0.017 |
| rs12042959 | 1 | 243533273 | A | G | 0.016 | 0.003 | -0.019 | 0.018 | 0.003  | 0.023 | -0.020 | 0.023 |
| rs6743060  | 2 | 629510    | A | C | 0.027 | 0.002 | -0.019 | 0.016 | -0.010 | 0.021 | -0.024 | 0.021 |
| rs10495563 | 2 | 9662210   | A | G | 0.012 | 0.002 | 0.032  | 0.013 | 0.014  | 0.017 | 0.038  | 0.017 |
| rs711869   | 2 | 13073967  | G | A | 0.017 | 0.002 | 0.001  | 0.013 | 0.016  | 0.016 | -0.011 | 0.016 |
| rs28445639 | 2 | 25182488  | T | C | 0.022 | 0.002 | 0.099  | 0.015 | 0.127  | 0.020 | 0.075  | 0.019 |
| rs2384463  | 2 | 26942256  | A | G | 0.011 | 0.002 | 0.004  | 0.012 | -0.016 | 0.016 | 0.019  | 0.016 |
| rs10153926 | 2 | 43189120  | A | G | 0.014 | 0.002 | -0.013 | 0.016 | 0.006  | 0.021 | -0.037 | 0.020 |
| rs7591387  | 2 | 43756032  | T | C | 0.018 | 0.003 | 0.103  | 0.020 | 0.145  | 0.025 | 0.057  | 0.025 |
| rs17326656 | 2 | 48962291  | T | G | 0.015 | 0.002 | -0.003 | 0.015 | 0.005  | 0.019 | -0.005 | 0.019 |
| rs929641   | 2 | 58792377  | A | G | 0.013 | 0.002 | 0.021  | 0.013 | 0.029  | 0.016 | 0.015  | 0.016 |
| rs6545714  | 2 | 59307725  | G | A | 0.014 | 0.002 | 0.006  | 0.013 | 0.016  | 0.016 | 0.005  | 0.016 |
| rs13028903 | 2 | 59951465  | T | C | 0.011 | 0.002 | -0.017 | 0.013 | -0.026 | 0.016 | -0.006 | 0.016 |
| rs2195086  | 2 | 60814466  | G | T | 0.014 | 0.002 | -0.020 | 0.018 | -0.034 | 0.023 | -0.003 | 0.022 |
| rs13391573 | 2 | 66237388  | T | C | 0.021 | 0.002 | -0.023 | 0.016 | -0.040 | 0.021 | -0.002 | 0.021 |
| rs11897119 | 2 | 66772000  | C | T | 0.013 | 0.002 | 0.017  | 0.013 | 0.015  | 0.016 | 0.011  | 0.016 |
| rs7598832  | 2 | 67853013  | C | T | 0.019 | 0.002 | 0.029  | 0.013 | 0.041  | 0.017 | 0.035  | 0.017 |
| rs6751316  | 2 | 100365061 | T | C | 0.018 | 0.003 | 0.012  | 0.018 | -0.002 | 0.024 | 0.023  | 0.023 |
| rs6542924  | 2 | 100893113 | C | A | 0.015 | 0.002 | -0.005 | 0.013 | -0.029 | 0.017 | 0.013  | 0.017 |
| rs4851057  | 2 | 105939237 | T | C | 0.016 | 0.003 | 0.015  | 0.019 | 0.013  | 0.024 | 0.023  | 0.024 |
| rs1345203  | 2 | 112253851 | T | C | 0.019 | 0.002 | 0.026  | 0.018 | 0.008  | 0.023 | 0.025  | 0.023 |
| rs4849294  | 2 | 114619997 | T | C | 0.012 | 0.002 | 0.015  | 0.013 | 0.007  | 0.016 | 0.017  | 0.016 |
| rs332105   | 2 | 119444229 | G | A | 0.014 | 0.002 | 0.005  | 0.013 | 0.003  | 0.016 | 0.001  | 0.016 |
| rs55920843 | 2 | 158412701 | T | G | 0.062 | 0.009 | -0.035 | 0.062 | -0.103 | 0.079 | 0.020  | 0.079 |
| rs1020731  | 2 | 161144055 | A | G | 0.013 | 0.002 | -0.032 | 0.014 | -0.035 | 0.017 | -0.022 | 0.017 |
| rs12621633 | 2 | 162859436 | A | G | 0.054 | 0.009 | 0.072  | 0.059 | 0.065  | 0.078 | 0.129  | 0.075 |
| rs10207936 | 2 | 164893801 | C | T | 0.013 | 0.002 | -0.015 | 0.015 | -0.006 | 0.020 | -0.017 | 0.019 |
| rs10195252 | 2 | 165513091 | T | C | 0.023 | 0.002 | -0.007 | 0.013 | -0.019 | 0.016 | -0.002 | 0.016 |
| rs12469667 | 2 | 166162705 | G | A | 0.013 | 0.002 | -0.025 | 0.015 | -0.021 | 0.019 | -0.027 | 0.018 |
| rs6433219  | 2 | 171421125 | A | G | 0.014 | 0.002 | -0.013 | 0.015 | -0.003 | 0.019 | -0.028 | 0.019 |
| rs2216931  | 2 | 181599070 | A | C | 0.012 | 0.002 | 0.013  | 0.013 | 0.020  | 0.017 | 0.006  | 0.017 |
| rs1569135  | 2 | 188115398 | A | G | 0.022 | 0.002 | 0.005  | 0.012 | 0.015  | 0.016 | -0.001 | 0.016 |
| rs1124639  | 2 | 200775744 | C | T | 0.011 | 0.002 | -0.022 | 0.012 | -0.005 | 0.016 | -0.035 | 0.016 |
| rs4673616  | 2 | 212281381 | G | T | 0.012 | 0.002 | 0.031  | 0.014 | 0.014  | 0.018 | 0.043  | 0.017 |
| rs7599312  | 2 | 213413231 | G | A | 0.011 | 0.002 | -0.022 | 0.014 | -0.018 | 0.018 | -0.017 | 0.018 |
| rs1017698  | 2 | 219170525 | G | A | 0.011 | 0.002 | 0.066  | 0.013 | 0.059  | 0.016 | 0.064  | 0.016 |
| rs7561798  | 2 | 228973660 | G | A | 0.010 | 0.002 | -0.009 | 0.012 | 0.007  | 0.016 | -0.024 | 0.016 |
| rs3796072  | 2 | 230667539 | C | T | 0.012 | 0.002 | -0.008 | 0.013 | -0.009 | 0.017 | -0.004 | 0.017 |
| rs3891424  | 2 | 239365456 | G | A | 0.028 | 0.004 | -0.015 | 0.029 | -0.046 | 0.038 | 0.014  | 0.037 |
| rs4686340  | 3 | 9345218   | A | C | 0.012 | 0.002 | 0.006  | 0.015 | -0.002 | 0.019 | 0.004  | 0.019 |
| rs2595004  | 3 | 11406721  | C | T | 0.016 | 0.002 | -0.009 | 0.016 | 0.019  | 0.021 | -0.035 | 0.021 |
| rs9872031  | 3 | 12496461  | A | G | 0.020 | 0.002 | -0.006 | 0.013 | -0.001 | 0.016 | -0.012 | 0.016 |
| rs2455848  | 3 | 15771372  | T | C | 0.013 | 0.002 | -0.004 | 0.013 | -0.019 | 0.017 | 0.011  | 0.017 |

|             |   |           |   |   |       |       |        |       |        |       |        |       |
|-------------|---|-----------|---|---|-------|-------|--------|-------|--------|-------|--------|-------|
| rs6442644   | 3 | 16852853  | G | T | 0.011 | 0.002 | 0.007  | 0.013 | 0.022  | 0.017 | -0.022 | 0.017 |
| rs4635727   | 3 | 18705035  | A | G | 0.012 | 0.002 | 0.037  | 0.014 | 0.046  | 0.018 | 0.043  | 0.018 |
| rs7616762   | 3 | 33869679  | G | A | 0.012 | 0.002 | 0.027  | 0.014 | 0.008  | 0.018 | 0.047  | 0.018 |
| rs11129657  | 3 | 35636709  | C | T | 0.018 | 0.002 | -0.005 | 0.015 | 0.012  | 0.020 | -0.023 | 0.020 |
| rs155524    | 3 | 37562141  | A | G | 0.013 | 0.002 | -0.005 | 0.013 | 0.014  | 0.016 | -0.020 | 0.016 |
| rs13092573  | 3 | 46988561  | T | C | 0.014 | 0.002 | 0.037  | 0.014 | 0.032  | 0.018 | 0.039  | 0.017 |
| rs2267846   | 3 | 48556339  | G | A | 0.014 | 0.002 | 0.050  | 0.014 | 0.021  | 0.018 | 0.083  | 0.018 |
| rs13316065  | 3 | 49884913  | T | C | 0.017 | 0.002 | -0.088 | 0.014 | -0.126 | 0.018 | -0.057 | 0.017 |
| rs12637870  | 3 | 50506073  | C | A | 0.017 | 0.003 | 0.036  | 0.017 | 0.053  | 0.022 | 0.005  | 0.021 |
| rs13080929  | 3 | 52885112  | A | C | 0.018 | 0.002 | -0.022 | 0.017 | -0.020 | 0.022 | -0.031 | 0.022 |
| rs1452075   | 3 | 62481063  | T | C | 0.012 | 0.002 | -0.014 | 0.014 | -0.001 | 0.018 | -0.027 | 0.018 |
| rs4132228   | 3 | 64708114  | C | T | 0.027 | 0.002 | -0.005 | 0.014 | 0.003  | 0.018 | -0.004 | 0.017 |
| rs13080520  | 3 | 81850742  | C | T | 0.011 | 0.002 | -0.002 | 0.013 | -0.014 | 0.017 | 0.013  | 0.016 |
| rs6548834   | 3 | 82704753  | A | G | 0.012 | 0.002 | -0.009 | 0.013 | -0.001 | 0.017 | -0.026 | 0.016 |
| rs12495178  | 3 | 85886077  | T | C | 0.012 | 0.002 | -0.035 | 0.013 | -0.045 | 0.017 | -0.031 | 0.016 |
| rs9942009   | 3 | 89121921  | T | C | 0.013 | 0.002 | -0.002 | 0.013 | -0.017 | 0.016 | -0.003 | 0.016 |
| rs1609906   | 3 | 94033599  | G | A | 0.013 | 0.002 | 0.016  | 0.012 | 0.023  | 0.016 | 0.002  | 0.016 |
| rs793456    | 3 | 99525631  | G | A | 0.011 | 0.002 | 0.026  | 0.013 | 0.020  | 0.016 | 0.036  | 0.016 |
| rs9861425   | 3 | 123072883 | C | A | 0.010 | 0.002 | 0.011  | 0.012 | 0.017  | 0.016 | 0.014  | 0.016 |
| rs111489708 | 3 | 127715518 | C | T | 0.027 | 0.005 | -0.007 | 0.030 | -0.012 | 0.039 | -0.002 | 0.038 |
| rs55683935  | 3 | 128349376 | T | G | 0.038 | 0.005 | 0.007  | 0.034 | -0.032 | 0.044 | 0.007  | 0.044 |
| rs2625963   | 3 | 129292948 | C | T | 0.027 | 0.002 | 0.018  | 0.017 | 0.029  | 0.022 | -0.009 | 0.022 |
| rs13063979  | 3 | 131564741 | G | T | 0.014 | 0.002 | -0.020 | 0.014 | -0.005 | 0.018 | -0.030 | 0.018 |
| rs645040    | 3 | 135926622 | T | G | 0.016 | 0.002 | -0.016 | 0.015 | -0.010 | 0.019 | -0.009 | 0.019 |
| rs13075615  | 3 | 136505832 | C | T | 0.018 | 0.002 | -0.019 | 0.018 | -0.016 | 0.022 | -0.014 | 0.023 |
| rs1672936   | 3 | 138340590 | A | G | 0.012 | 0.002 | 0.001  | 0.013 | 0.008  | 0.016 | 0.000  | 0.016 |
| rs11710396  | 3 | 156278785 | G | A | 0.013 | 0.002 | 0.001  | 0.014 | 0.008  | 0.018 | -0.005 | 0.017 |
| rs10049088  | 3 | 156797648 | C | T | 0.027 | 0.002 | -0.002 | 0.013 | -0.001 | 0.016 | -0.008 | 0.016 |
| rs998749    | 3 | 168972802 | A | G | 0.013 | 0.002 | -0.006 | 0.013 | -0.029 | 0.016 | 0.013  | 0.016 |
| rs4894803   | 3 | 171800256 | A | G | 0.015 | 0.002 | -0.018 | 0.014 | -0.011 | 0.017 | -0.024 | 0.018 |
| rs7647305   | 3 | 185834290 | C | T | 0.014 | 0.002 | -0.022 | 0.015 | -0.022 | 0.020 | -0.035 | 0.019 |
| rs2590440   | 3 | 187674660 | G | A | 0.014 | 0.002 | -0.017 | 0.015 | -0.014 | 0.020 | -0.022 | 0.020 |
| rs11724804  | 4 | 965779    | G | A | 0.017 | 0.002 | -0.010 | 0.013 | -0.024 | 0.017 | -0.006 | 0.016 |
| rs3121419   | 4 | 3232257   | C | T | 0.013 | 0.002 | 0.046  | 0.013 | 0.052  | 0.017 | 0.040  | 0.017 |
| rs10004900  | 4 | 20115547  | G | T | 0.017 | 0.003 | 0.007  | 0.019 | 0.010  | 0.024 | -0.004 | 0.024 |
| rs10019888  | 4 | 26062990  | G | A | 0.021 | 0.002 | 0.066  | 0.017 | 0.106  | 0.021 | 0.037  | 0.021 |
| rs13130484  | 4 | 45175691  | T | C | 0.015 | 0.002 | -0.006 | 0.013 | -0.006 | 0.016 | -0.002 | 0.016 |
| rs12643960  | 4 | 78655671  | G | A | 0.017 | 0.003 | -0.009 | 0.018 | 0.005  | 0.023 | -0.013 | 0.023 |
| rs2167750   | 4 | 89730074  | T | C | 0.020 | 0.002 | 0.001  | 0.012 | 0.000  | 0.016 | -0.004 | 0.016 |
| rs1789882   | 4 | 100235053 | A | G | 0.016 | 0.002 | 0.010  | 0.016 | 0.006  | 0.021 | 0.014  | 0.021 |
| rs3804381   | 4 | 102143616 | A | G | 0.012 | 0.002 | 0.038  | 0.014 | 0.058  | 0.018 | 0.026  | 0.018 |
| rs809955    | 4 | 140874760 | G | A | 0.016 | 0.002 | -0.011 | 0.013 | 0.007  | 0.017 | -0.020 | 0.016 |
| rs789351    | 4 | 145868370 | T | C | 0.012 | 0.002 | 0.023  | 0.013 | 0.030  | 0.016 | 0.027  | 0.016 |
| rs7727202   | 5 | 4007914   | C | A | 0.013 | 0.002 | -0.008 | 0.013 | -0.010 | 0.016 | -0.011 | 0.016 |
| rs2448      | 5 | 53302354  | T | C | 0.016 | 0.002 | -0.005 | 0.014 | 0.004  | 0.018 | -0.018 | 0.018 |
| rs459193    | 5 | 55806751  | A | G | 0.024 | 0.002 | 0.006  | 0.014 | -0.004 | 0.019 | 0.024  | 0.018 |
| rs628763    | 5 | 66312570  | G | T | 0.011 | 0.002 | 0.018  | 0.013 | 0.008  | 0.016 | 0.020  | 0.016 |
| rs4704187   | 5 | 74480288  | T | C | 0.012 | 0.002 | 0.009  | 0.013 | -0.011 | 0.017 | 0.027  | 0.016 |
| rs2112347   | 5 | 75015242  | T | G | 0.015 | 0.002 | 0.008  | 0.013 | -0.013 | 0.017 | 0.029  | 0.016 |
| rs17568628  | 5 | 76046939  | C | T | 0.026 | 0.004 | -0.029 | 0.031 | -0.035 | 0.039 | 0.002  | 0.039 |
| rs13167306  | 5 | 76574841  | C | T | 0.012 | 0.002 | -0.001 | 0.013 | 0.004  | 0.017 | -0.001 | 0.017 |

|             |   |           |   |   |       |       |        |       |        |       |        |       |
|-------------|---|-----------|---|---|-------|-------|--------|-------|--------|-------|--------|-------|
| rs6870983   | 5 | 87697533  | C | T | 0.016 | 0.002 | 0.007  | 0.015 | 0.025  | 0.019 | -0.003 | 0.019 |
| rs2161097   | 5 | 103945178 | T | C | 0.013 | 0.002 | 0.014  | 0.012 | 0.002  | 0.016 | 0.018  | 0.016 |
| rs4395620   | 5 | 106328326 | T | C | 0.011 | 0.002 | 0.009  | 0.013 | 0.017  | 0.016 | 0.002  | 0.016 |
| rs11956399  | 5 | 112888676 | T | G | 0.016 | 0.002 | -0.024 | 0.016 | -0.027 | 0.021 | -0.014 | 0.020 |
| rs3813309   | 5 | 118690998 | A | G | 0.014 | 0.002 | -0.016 | 0.014 | -0.021 | 0.018 | -0.014 | 0.017 |
| rs11747001  | 5 | 132412299 | A | G | 0.015 | 0.002 | -0.031 | 0.014 | -0.044 | 0.019 | -0.022 | 0.018 |
| rs11167753  | 5 | 140989410 | C | T | 0.011 | 0.002 | 0.038  | 0.014 | 0.071  | 0.018 | 0.012  | 0.018 |
| rs10477191  | 5 | 142077715 | G | A | 0.028 | 0.004 | -0.023 | 0.032 | -0.023 | 0.041 | -0.005 | 0.040 |
| rs2964006   | 5 | 153213880 | T | G | 0.013 | 0.002 | -0.009 | 0.012 | 0.011  | 0.016 | -0.021 | 0.016 |
| rs4454042   | 5 | 155824774 | T | C | 0.013 | 0.002 | 0.000  | 0.014 | 0.001  | 0.018 | -0.003 | 0.018 |
| rs1122080   | 5 | 158015903 | G | A | 0.013 | 0.002 | 0.013  | 0.016 | 0.032  | 0.021 | 0.002  | 0.020 |
| rs72846967  | 5 | 171849098 | G | A | 0.012 | 0.002 | 0.000  | 0.014 | -0.007 | 0.018 | -0.001 | 0.017 |
| rs17738166  | 5 | 172997978 | A | G | 0.011 | 0.002 | 0.003  | 0.013 | -0.001 | 0.016 | 0.013  | 0.016 |
| rs6861681   | 5 | 173362458 | A | G | 0.018 | 0.002 | -0.040 | 0.014 | -0.062 | 0.018 | -0.022 | 0.017 |
| rs6556301   | 5 | 176527577 | T | G | 0.013 | 0.002 | 0.001  | 0.013 | -0.001 | 0.017 | 0.006  | 0.017 |
| rs1294410   | 6 | 6738752   | C | T | 0.025 | 0.002 | 0.012  | 0.013 | -0.002 | 0.017 | 0.019  | 0.016 |
| rs1334576   | 6 | 7211818   | G | A | 0.016 | 0.002 | 0.010  | 0.013 | 0.016  | 0.016 | 0.004  | 0.016 |
| rs9296938   | 6 | 14573063  | G | A | 0.015 | 0.002 | -0.030 | 0.014 | -0.018 | 0.018 | -0.037 | 0.018 |
| rs112266013 | 6 | 15230743  | G | A | 0.017 | 0.003 | -0.042 | 0.018 | -0.030 | 0.024 | -0.052 | 0.023 |
| rs7744833   | 6 | 20581828  | A | G | 0.013 | 0.002 | -0.044 | 0.013 | -0.060 | 0.017 | -0.027 | 0.017 |
| rs3094621   | 6 | 30328753  | T | C | 0.019 | 0.003 | 0.070  | 0.021 | 0.162  | 0.028 | 0.000  | 0.027 |
| rs1793892   | 6 | 31221351  | C | T | 0.018 | 0.003 | 0.044  | 0.020 | 0.107  | 0.025 | 0.000  | 0.026 |
| rs454748    | 6 | 32213210  | A | G | 0.015 | 0.002 | 0.027  | 0.014 | 0.053  | 0.018 | 0.004  | 0.018 |
| rs3117324   | 6 | 33324527  | T | G | 0.012 | 0.002 | 0.010  | 0.013 | 0.006  | 0.017 | 0.016  | 0.016 |
| rs114760566 | 6 | 34192036  | A | C | 0.067 | 0.005 | -0.022 | 0.032 | -0.014 | 0.041 | -0.027 | 0.040 |
| rs147499178 | 6 | 34817079  | T | C | 0.048 | 0.006 | -0.057 | 0.047 | -0.039 | 0.059 | -0.074 | 0.059 |
| rs146874451 | 6 | 35383027  | G | A | 0.040 | 0.006 | -0.072 | 0.042 | -0.095 | 0.053 | -0.074 | 0.053 |
| rs4487571   | 6 | 41702619  | A | C | 0.021 | 0.004 | 0.036  | 0.026 | 0.042  | 0.034 | 0.025  | 0.032 |
| rs3828755   | 6 | 43115220  | G | A | 0.013 | 0.002 | 0.013  | 0.013 | 0.010  | 0.016 | 0.023  | 0.016 |
| rs998584    | 6 | 43757896  | A | C | 0.035 | 0.002 | -0.006 | 0.013 | -0.005 | 0.017 | 0.005  | 0.016 |
| rs17665162  | 6 | 50275258  | C | T | 0.023 | 0.004 | 0.026  | 0.027 | 0.027  | 0.036 | 0.020  | 0.035 |
| rs987237    | 6 | 50803050  | G | A | 0.020 | 0.002 | 0.003  | 0.016 | 0.010  | 0.021 | 0.001  | 0.020 |
| rs9370243   | 6 | 53789830  | T | G | 0.020 | 0.003 | -0.014 | 0.022 | 0.002  | 0.029 | -0.034 | 0.029 |
| rs2503749   | 6 | 81349756  | T | G | 0.014 | 0.002 | -0.019 | 0.012 | -0.024 | 0.016 | -0.016 | 0.016 |
| rs72895340  | 6 | 82297307  | A | G | 0.028 | 0.005 | -0.003 | 0.029 | -0.015 | 0.038 | 0.014  | 0.037 |
| rs9294260   | 6 | 83433228  | A | G | 0.010 | 0.002 | -0.024 | 0.013 | -0.028 | 0.016 | -0.035 | 0.016 |
| rs9341990   | 6 | 85391568  | A | G | 0.012 | 0.002 | 0.016  | 0.013 | 0.012  | 0.016 | 0.020  | 0.016 |
| rs10499013  | 6 | 97946396  | G | A | 0.013 | 0.002 | -0.007 | 0.014 | -0.033 | 0.018 | 0.010  | 0.018 |
| rs901630    | 6 | 98539519  | C | T | 0.012 | 0.002 | 0.005  | 0.013 | -0.004 | 0.016 | 0.002  | 0.016 |
| rs2503099   | 6 | 100610101 | G | A | 0.021 | 0.002 | -0.019 | 0.017 | -0.017 | 0.021 | -0.015 | 0.021 |
| rs9400239   | 6 | 108977663 | C | T | 0.013 | 0.002 | 0.001  | 0.014 | -0.007 | 0.018 | 0.012  | 0.017 |
| rs2357760   | 6 | 120213880 | A | G | 0.011 | 0.002 | -0.003 | 0.013 | 0.004  | 0.017 | -0.014 | 0.017 |
| rs9375417   | 6 | 126248374 | C | T | 0.012 | 0.002 | -0.013 | 0.012 | 0.004  | 0.016 | -0.027 | 0.016 |
| rs143474978 | 6 | 126814933 | C | T | 0.074 | 0.006 | -0.017 | 0.036 | 0.011  | 0.047 | -0.061 | 0.047 |
| rs72959041  | 6 | 127454893 | A | G | 0.126 | 0.004 | -0.026 | 0.031 | 0.018  | 0.039 | -0.090 | 0.039 |
| rs605066    | 6 | 139829666 | C | T | 0.019 | 0.002 | -0.027 | 0.013 | -0.027 | 0.016 | -0.022 | 0.016 |
| rs672341    | 6 | 153455994 | G | A | 0.012 | 0.002 | 0.010  | 0.013 | 0.011  | 0.016 | 0.007  | 0.016 |
| rs668871    | 6 | 160769811 | C | T | 0.013 | 0.002 | -0.011 | 0.012 | -0.002 | 0.016 | -0.018 | 0.016 |
| rs6955431   | 7 | 20444060  | T | C | 0.011 | 0.002 | -0.031 | 0.013 | -0.035 | 0.017 | -0.029 | 0.017 |
| rs2391168   | 7 | 25862790  | A | C | 0.026 | 0.002 | -0.026 | 0.016 | -0.015 | 0.020 | -0.034 | 0.020 |
| rs1534696   | 7 | 26397239  | C | A | 0.023 | 0.002 | -0.004 | 0.013 | 0.000  | 0.017 | -0.003 | 0.016 |

|            |    |           |   |   |       |       |        |       |        |       |        |       |
|------------|----|-----------|---|---|-------|-------|--------|-------|--------|-------|--------|-------|
| rs7801581  | 7  | 27223771  | T | C | 0.017 | 0.002 | -0.043 | 0.015 | -0.017 | 0.019 | -0.067 | 0.019 |
| rs1708302  | 7  | 28198677  | C | T | 0.011 | 0.002 | 0.036  | 0.012 | 0.068  | 0.016 | 0.002  | 0.016 |
| rs2715135  | 7  | 50750128  | T | G | 0.011 | 0.002 | 0.024  | 0.013 | 0.028  | 0.017 | 0.018  | 0.016 |
| rs1718618  | 7  | 68632251  | G | A | 0.024 | 0.004 | 0.018  | 0.028 | 0.002  | 0.036 | 0.045  | 0.036 |
| rs55747707 | 7  | 73037366  | G | A | 0.015 | 0.002 | 0.039  | 0.016 | 0.056  | 0.021 | 0.025  | 0.020 |
| rs12669521 | 7  | 77047102  | A | G | 0.013 | 0.002 | 0.005  | 0.013 | -0.018 | 0.017 | 0.031  | 0.017 |
| rs11764879 | 7  | 77333267  | G | A | 0.012 | 0.002 | -0.017 | 0.014 | -0.021 | 0.018 | -0.011 | 0.018 |
| rs1011024  | 7  | 99197401  | A | G | 0.015 | 0.002 | -0.016 | 0.017 | -0.005 | 0.022 | -0.026 | 0.022 |
| rs1142     | 7  | 104756326 | T | C | 0.015 | 0.002 | 0.008  | 0.013 | 0.018  | 0.017 | 0.012  | 0.017 |
| rs4727695  | 7  | 107614003 | A | G | 0.022 | 0.003 | 0.001  | 0.021 | -0.016 | 0.027 | 0.022  | 0.027 |
| rs4476935  | 7  | 112987650 | C | T | 0.011 | 0.002 | -0.010 | 0.013 | -0.043 | 0.016 | 0.021  | 0.016 |
| rs39312    | 7  | 116954785 | C | A | 0.015 | 0.002 | 0.013  | 0.013 | 0.034  | 0.017 | -0.008 | 0.017 |
| rs6466774  | 7  | 120886915 | T | C | 0.013 | 0.002 | 0.005  | 0.013 | -0.001 | 0.016 | 0.018  | 0.016 |
| rs13229637 | 7  | 136717447 | T | C | 0.016 | 0.003 | 0.011  | 0.017 | 0.033  | 0.022 | -0.007 | 0.022 |
| rs9969455  | 8  | 12617155  | A | G | 0.011 | 0.002 | -0.013 | 0.013 | 0.006  | 0.017 | -0.028 | 0.017 |
| rs15285    | 8  | 19824667  | C | T | 0.012 | 0.002 | 0.022  | 0.014 | 0.028  | 0.018 | 0.012  | 0.018 |
| rs6983481  | 8  | 23609009  | G | T | 0.019 | 0.002 | 0.012  | 0.015 | 0.009  | 0.019 | 0.006  | 0.018 |
| rs11992444 | 8  | 25464690  | T | G | 0.019 | 0.002 | 0.010  | 0.015 | -0.003 | 0.020 | 0.004  | 0.020 |
| rs2725371  | 8  | 30854033  | A | G | 0.017 | 0.002 | 0.026  | 0.013 | 0.027  | 0.017 | 0.019  | 0.017 |
| rs881301   | 8  | 38332318  | C | T | 0.013 | 0.002 | 0.001  | 0.013 | -0.009 | 0.016 | 0.006  | 0.016 |
| rs62506196 | 8  | 60264465  | C | A | 0.016 | 0.003 | 0.038  | 0.017 | 0.052  | 0.022 | 0.027  | 0.022 |
| rs13255070 | 8  | 68203608  | G | A | 0.014 | 0.002 | -0.015 | 0.014 | 0.002  | 0.018 | -0.028 | 0.018 |
| rs4738141  | 8  | 72469742  | G | A | 0.020 | 0.002 | 0.010  | 0.014 | 0.019  | 0.018 | 0.002  | 0.018 |
| rs1431659  | 8  | 73439070  | A | G | 0.014 | 0.002 | -0.013 | 0.014 | -0.001 | 0.018 | -0.020 | 0.018 |
| rs13256367 | 8  | 128334900 | A | C | 0.014 | 0.002 | -0.008 | 0.013 | 0.013  | 0.017 | -0.019 | 0.017 |
| rs10505628 | 8  | 135708575 | C | T | 0.010 | 0.002 | 0.015  | 0.013 | 0.022  | 0.016 | 0.009  | 0.016 |
| rs11782074 | 8  | 142617096 | T | G | 0.011 | 0.002 | -0.022 | 0.013 | -0.003 | 0.017 | -0.040 | 0.016 |
| rs6474945  | 9  | 15670492  | G | T | 0.010 | 0.002 | -0.001 | 0.012 | 0.000  | 0.016 | 0.002  | 0.016 |
| rs10968576 | 9  | 28414339  | G | A | 0.014 | 0.002 | 0.018  | 0.013 | 0.025  | 0.017 | 0.015  | 0.017 |
| rs1680490  | 9  | 29642688  | G | A | 0.012 | 0.002 | 0.001  | 0.013 | -0.009 | 0.017 | 0.009  | 0.017 |
| rs10991926 | 9  | 94180339  | T | C | 0.012 | 0.002 | 0.021  | 0.013 | 0.026  | 0.017 | 0.011  | 0.017 |
| rs10821003 | 9  | 95452843  | A | C | 0.017 | 0.002 | 0.064  | 0.016 | 0.078  | 0.021 | 0.064  | 0.021 |
| rs7848336  | 9  | 96454513  | C | T | 0.013 | 0.002 | -0.006 | 0.014 | -0.011 | 0.018 | 0.004  | 0.018 |
| rs2398893  | 9  | 96758342  | A | G | 0.016 | 0.002 | -0.034 | 0.014 | -0.029 | 0.018 | -0.049 | 0.018 |
| rs62565259 | 9  | 102162570 | C | T | 0.016 | 0.003 | -0.032 | 0.017 | -0.028 | 0.022 | -0.043 | 0.022 |
| rs10991433 | 9  | 107726918 | C | T | 0.025 | 0.003 | 0.021  | 0.021 | -0.010 | 0.027 | 0.051  | 0.026 |
| rs10978310 | 9  | 108622461 | A | G | 0.023 | 0.004 | -0.015 | 0.028 | 0.003  | 0.036 | -0.025 | 0.036 |
| rs10116353 | 9  | 111950088 | G | T | 0.014 | 0.002 | 0.020  | 0.014 | 0.003  | 0.017 | 0.038  | 0.017 |
| rs10980797 | 9  | 113912553 | G | A | 0.015 | 0.002 | 0.011  | 0.012 | 0.025  | 0.016 | 0.002  | 0.016 |
| rs1752169  | 9  | 126586563 | A | C | 0.012 | 0.002 | -0.006 | 0.014 | 0.001  | 0.018 | -0.012 | 0.018 |
| rs4382592  | 9  | 134870755 | T | G | 0.012 | 0.002 | 0.019  | 0.014 | 0.025  | 0.017 | 0.019  | 0.017 |
| rs28647893 | 9  | 136994893 | C | T | 0.012 | 0.002 | 0.001  | 0.014 | 0.030  | 0.018 | -0.023 | 0.017 |
| rs10795055 | 10 | 3581221   | A | G | 0.011 | 0.002 | 0.019  | 0.013 | 0.030  | 0.016 | 0.018  | 0.016 |
| rs12774134 | 10 | 4963327   | C | T | 0.016 | 0.003 | -0.012 | 0.019 | -0.029 | 0.025 | 0.001  | 0.025 |
| rs7907173  | 10 | 5648787   | G | A | 0.011 | 0.002 | 0.004  | 0.012 | -0.011 | 0.016 | 0.016  | 0.016 |
| rs1243188  | 10 | 21908803  | C | T | 0.015 | 0.002 | 0.029  | 0.013 | 0.019  | 0.017 | 0.031  | 0.017 |
| rs1494204  | 10 | 27904321  | C | T | 0.011 | 0.002 | -0.007 | 0.013 | 0.012  | 0.016 | -0.021 | 0.016 |
| rs2907794  | 10 | 32391109  | G | A | 0.012 | 0.002 | 0.057  | 0.015 | 0.054  | 0.019 | 0.054  | 0.019 |
| rs10827252 | 10 | 33672884  | G | A | 0.011 | 0.002 | -0.017 | 0.013 | -0.007 | 0.016 | -0.021 | 0.016 |
| rs1757471  | 10 | 34168090  | T | C | 0.013 | 0.002 | -0.005 | 0.012 | -0.002 | 0.016 | -0.005 | 0.016 |
| rs708437   | 10 | 36227656  | A | G | 0.014 | 0.002 | 0.011  | 0.016 | -0.022 | 0.021 | 0.042  | 0.021 |

|             |    |           |   |   |       |       |        |       |        |       |        |       |
|-------------|----|-----------|---|---|-------|-------|--------|-------|--------|-------|--------|-------|
| rs7070670   | 10 | 61842645  | C | T | 0.013 | 0.002 | -0.023 | 0.014 | -0.046 | 0.017 | -0.019 | 0.017 |
| rs7070749   | 10 | 63882682  | A | G | 0.013 | 0.002 | 0.008  | 0.013 | 0.005  | 0.016 | 0.005  | 0.016 |
| rs780159    | 10 | 80907147  | G | A | 0.013 | 0.002 | -0.016 | 0.013 | -0.013 | 0.016 | -0.025 | 0.016 |
| rs3814614   | 10 | 88128281  | A | G | 0.011 | 0.002 | -0.008 | 0.013 | -0.022 | 0.016 | -0.002 | 0.016 |
| rs10788569  | 10 | 89604732  | C | T | 0.013 | 0.002 | 0.013  | 0.014 | 0.021  | 0.018 | 0.009  | 0.018 |
| rs117471638 | 10 | 93158084  | A | G | 0.042 | 0.007 | -0.156 | 0.049 | -0.142 | 0.064 | -0.108 | 0.062 |
| rs1437      | 10 | 93790523  | A | G | 0.013 | 0.002 | 0.034  | 0.013 | 0.020  | 0.017 | 0.041  | 0.016 |
| rs10882271  | 10 | 95346067  | A | G | 0.014 | 0.002 | 0.021  | 0.014 | 0.021  | 0.018 | 0.020  | 0.018 |
| rs10883518  | 10 | 102416555 | C | A | 0.011 | 0.002 | -0.008 | 0.013 | 0.006  | 0.017 | -0.011 | 0.017 |
| rs12777288  | 10 | 115860058 | C | T | 0.014 | 0.002 | 0.017  | 0.015 | -0.004 | 0.019 | 0.034  | 0.019 |
| rs2254069   | 10 | 122875589 | A | G | 0.021 | 0.003 | -0.023 | 0.020 | -0.014 | 0.025 | -0.036 | 0.025 |
| rs61876729  | 11 | 778857    | A | G | 0.021 | 0.003 | -0.017 | 0.023 | -0.021 | 0.030 | -0.035 | 0.030 |
| rs4929927   | 11 | 8658485   | G | A | 0.015 | 0.002 | 0.001  | 0.013 | 0.014  | 0.017 | -0.013 | 0.016 |
| rs2957658   | 11 | 10393468  | G | A | 0.013 | 0.002 | -0.010 | 0.013 | -0.031 | 0.016 | 0.006  | 0.016 |
| rs7932891   | 11 | 10921512  | A | G | 0.011 | 0.002 | -0.009 | 0.014 | 0.011  | 0.018 | -0.022 | 0.018 |
| rs1481880   | 11 | 13269548  | A | G | 0.013 | 0.002 | 0.008  | 0.014 | -0.002 | 0.018 | 0.007  | 0.018 |
| rs4141261   | 11 | 17708379  | G | T | 0.011 | 0.002 | -0.008 | 0.013 | -0.021 | 0.017 | -0.006 | 0.017 |
| rs11030107  | 11 | 27694835  | G | A | 0.018 | 0.002 | -0.002 | 0.014 | -0.004 | 0.019 | -0.010 | 0.018 |
| rs605765    | 11 | 30217503  | C | T | 0.011 | 0.002 | -0.015 | 0.013 | -0.011 | 0.016 | -0.024 | 0.016 |
| rs4755720   | 11 | 43628749  | C | T | 0.013 | 0.002 | 0.006  | 0.013 | 0.014  | 0.016 | -0.007 | 0.016 |
| rs11039290  | 11 | 47572279  | G | A | 0.017 | 0.002 | -0.005 | 0.013 | 0.004  | 0.017 | -0.007 | 0.017 |
| rs2428548   | 11 | 62311462  | G | A | 0.015 | 0.002 | -0.008 | 0.013 | -0.023 | 0.017 | -0.013 | 0.016 |
| rs35169799  | 11 | 64031241  | T | C | 0.037 | 0.004 | 0.070  | 0.027 | 0.092  | 0.034 | 0.053  | 0.034 |
| rs10896012  | 11 | 65278461  | C | T | 0.018 | 0.002 | -0.022 | 0.016 | -0.032 | 0.020 | -0.010 | 0.020 |
| rs2276106   | 11 | 66105817  | T | C | 0.015 | 0.002 | -0.007 | 0.014 | -0.013 | 0.018 | -0.006 | 0.018 |
| rs7395513   | 11 | 69262756  | G | A | 0.017 | 0.002 | -0.020 | 0.013 | -0.021 | 0.016 | -0.020 | 0.016 |
| rs536665    | 11 | 85322400  | G | A | 0.017 | 0.002 | 0.010  | 0.016 | 0.005  | 0.020 | 0.023  | 0.020 |
| rs647248    | 11 | 89917699  | A | G | 0.011 | 0.002 | -0.009 | 0.013 | 0.000  | 0.016 | -0.024 | 0.016 |
| rs2513987   | 11 | 102977271 | G | A | 0.014 | 0.002 | 0.013  | 0.014 | 0.000  | 0.018 | 0.018  | 0.018 |
| rs2276390   | 11 | 111895254 | G | T | 0.021 | 0.002 | -0.007 | 0.013 | -0.012 | 0.017 | -0.001 | 0.017 |
| rs11214589  | 11 | 113245048 | G | A | 0.011 | 0.002 | 0.004  | 0.013 | -0.002 | 0.016 | 0.000  | 0.016 |
| rs11216183  | 11 | 116781545 | A | C | 0.023 | 0.003 | 0.025  | 0.021 | -0.002 | 0.027 | 0.033  | 0.027 |
| rs3825061   | 11 | 118944675 | T | C | 0.014 | 0.002 | 0.001  | 0.013 | 0.006  | 0.016 | 0.001  | 0.016 |
| rs579682    | 11 | 122014110 | C | T | 0.013 | 0.002 | 0.018  | 0.014 | -0.011 | 0.018 | 0.044  | 0.017 |
| rs2512885   | 11 | 131467794 | C | T | 0.010 | 0.002 | 0.022  | 0.012 | 0.020  | 0.016 | 0.020  | 0.016 |
| rs4936175   | 11 | 132641959 | C | T | 0.010 | 0.002 | -0.020 | 0.013 | -0.017 | 0.016 | -0.019 | 0.016 |
| rs12828016  | 12 | 998365    | G | T | 0.011 | 0.002 | 0.028  | 0.013 | -0.005 | 0.016 | 0.052  | 0.016 |
| rs7222      | 12 | 2055266   | T | C | 0.011 | 0.002 | -0.020 | 0.013 | -0.035 | 0.016 | -0.004 | 0.016 |
| rs544668    | 12 | 3388004   | T | C | 0.011 | 0.002 | 0.014  | 0.013 | 0.007  | 0.016 | 0.012  | 0.016 |
| rs34322     | 12 | 12879570  | T | C | 0.010 | 0.002 | 0.017  | 0.013 | 0.024  | 0.016 | 0.007  | 0.016 |
| rs11055887  | 12 | 14417179  | G | A | 0.013 | 0.002 | 0.041  | 0.016 | 0.036  | 0.021 | 0.041  | 0.020 |
| rs11048456  | 12 | 26463082  | C | T | 0.027 | 0.002 | 0.026  | 0.014 | 0.004  | 0.018 | 0.036  | 0.018 |
| rs11051005  | 12 | 30783475  | A | G | 0.013 | 0.002 | -0.051 | 0.014 | -0.022 | 0.018 | -0.070 | 0.018 |
| rs10506110  | 12 | 33708552  | A | C | 0.014 | 0.002 | -0.012 | 0.013 | -0.007 | 0.017 | -0.018 | 0.017 |
| rs12372466  | 12 | 34636450  | A | G | 0.011 | 0.002 | -0.005 | 0.013 | -0.008 | 0.017 | -0.005 | 0.016 |
| rs11183232  | 12 | 37941053  | A | G | 0.011 | 0.002 | -0.001 | 0.013 | -0.004 | 0.017 | -0.002 | 0.016 |
| rs1026462   | 12 | 41821630  | G | A | 0.013 | 0.002 | 0.004  | 0.012 | 0.028  | 0.016 | -0.030 | 0.016 |
| rs7138803   | 12 | 50247468  | A | G | 0.013 | 0.002 | 0.017  | 0.013 | 0.015  | 0.017 | 0.019  | 0.016 |
| rs1443512   | 12 | 54342684  | A | C | 0.028 | 0.002 | -0.005 | 0.015 | -0.018 | 0.019 | 0.011  | 0.019 |
| rs2277339   | 12 | 57146069  | G | T | 0.017 | 0.003 | 0.035  | 0.021 | 0.035  | 0.026 | 0.026  | 0.026 |
| rs11176015  | 12 | 66441684  | T | C | 0.015 | 0.002 | -0.003 | 0.014 | 0.010  | 0.018 | -0.004 | 0.018 |

|            |    |           |   |   |       |       |        |       |        |       |        |       |
|------------|----|-----------|---|---|-------|-------|--------|-------|--------|-------|--------|-------|
| rs704061   | 12 | 89771903  | C | T | 0.012 | 0.002 | -0.008 | 0.012 | 0.021  | 0.016 | -0.035 | 0.016 |
| rs11107169 | 12 | 94126855  | A | G | 0.012 | 0.002 | 0.000  | 0.013 | -0.028 | 0.016 | 0.025  | 0.016 |
| rs7311622  | 12 | 98772975  | C | T | 0.012 | 0.002 | -0.019 | 0.013 | -0.024 | 0.016 | -0.014 | 0.016 |
| rs3764002  | 12 | 108618630 | C | T | 0.021 | 0.002 | 0.021  | 0.014 | 0.041  | 0.018 | 0.003  | 0.018 |
| rs74628422 | 12 | 116034706 | A | G | 0.014 | 0.002 | 0.004  | 0.015 | -0.029 | 0.020 | 0.024  | 0.019 |
| rs7961979  | 12 | 121671261 | A | C | 0.016 | 0.003 | -0.012 | 0.019 | 0.015  | 0.025 | -0.030 | 0.024 |
| rs11608693 | 12 | 122208968 | G | A | 0.017 | 0.003 | 0.019  | 0.018 | 0.016  | 0.023 | 0.018  | 0.024 |
| rs2454702  | 12 | 123209159 | C | T | 0.020 | 0.002 | 0.015  | 0.015 | 0.009  | 0.020 | 0.015  | 0.020 |
| rs1568427  | 12 | 123738678 | G | A | 0.019 | 0.002 | -0.014 | 0.014 | -0.028 | 0.018 | -0.004 | 0.018 |
| rs863750   | 12 | 124505444 | T | C | 0.026 | 0.002 | -0.011 | 0.013 | -0.006 | 0.016 | -0.022 | 0.016 |
| rs12828318 | 12 | 133766122 | A | G | 0.013 | 0.002 | 0.028  | 0.018 | 0.032  | 0.023 | 0.021  | 0.023 |
| rs1360485  | 13 | 31031884  | T | C | 0.015 | 0.002 | 0.010  | 0.014 | 0.010  | 0.018 | 0.010  | 0.017 |
| rs2475837  | 13 | 50535863  | T | C | 0.015 | 0.003 | 0.006  | 0.020 | 0.027  | 0.025 | -0.014 | 0.025 |
| rs797486   | 13 | 51221618  | A | C | 0.032 | 0.003 | -0.001 | 0.019 | 0.006  | 0.024 | -0.004 | 0.024 |
| rs1379828  | 13 | 54396602  | C | T | 0.013 | 0.002 | -0.026 | 0.015 | -0.040 | 0.020 | -0.015 | 0.020 |
| rs564930   | 13 | 54756074  | T | C | 0.020 | 0.003 | 0.010  | 0.019 | 0.027  | 0.024 | 0.002  | 0.024 |
| rs9569777  | 13 | 58484786  | G | T | 0.013 | 0.002 | -0.002 | 0.017 | 0.002  | 0.022 | -0.017 | 0.021 |
| rs4055791  | 13 | 59266053  | C | T | 0.012 | 0.002 | -0.011 | 0.013 | -0.028 | 0.016 | -0.001 | 0.016 |
| rs1441264  | 13 | 79580919  | A | G | 0.011 | 0.002 | -0.024 | 0.013 | -0.032 | 0.017 | -0.017 | 0.016 |
| rs12430764 | 13 | 93896935  | A | G | 0.011 | 0.002 | 0.018  | 0.012 | 0.032  | 0.016 | 0.012  | 0.016 |
| rs9556979  | 13 | 99241507  | G | T | 0.011 | 0.002 | 0.036  | 0.014 | 0.037  | 0.018 | 0.036  | 0.017 |
| rs9515201  | 13 | 111040798 | C | A | 0.012 | 0.002 | 0.025  | 0.014 | 0.029  | 0.018 | 0.022  | 0.017 |
| rs1163627  | 13 | 112225701 | A | C | 0.010 | 0.002 | 0.003  | 0.013 | 0.001  | 0.016 | -0.002 | 0.016 |
| rs10132280 | 14 | 25928179  | C | A | 0.012 | 0.002 | -0.021 | 0.014 | -0.020 | 0.018 | -0.027 | 0.017 |
| rs61986159 | 14 | 53956168  | T | C | 0.014 | 0.002 | 0.004  | 0.015 | -0.018 | 0.019 | 0.017  | 0.019 |
| rs1190982  | 14 | 58815839  | T | C | 0.016 | 0.002 | 0.000  | 0.014 | -0.011 | 0.018 | 0.008  | 0.017 |
| rs2412107  | 14 | 65426216  | T | G | 0.013 | 0.002 | -0.002 | 0.015 | 0.009  | 0.019 | -0.005 | 0.019 |
| rs2526886  | 14 | 71359064  | T | G | 0.013 | 0.002 | -0.013 | 0.013 | -0.017 | 0.017 | -0.011 | 0.017 |
| rs17109256 | 14 | 79939993  | A | G | 0.017 | 0.002 | 0.036  | 0.015 | 0.015  | 0.019 | 0.047  | 0.019 |
| rs11620623 | 14 | 91555547  | C | T | 0.011 | 0.002 | -0.010 | 0.014 | -0.001 | 0.018 | -0.015 | 0.018 |
| rs7143963  | 14 | 103304425 | T | C | 0.014 | 0.002 | 0.013  | 0.016 | 0.010  | 0.021 | 0.030  | 0.021 |
| rs12441543 | 15 | 31689543  | G | A | 0.012 | 0.002 | 0.009  | 0.014 | -0.002 | 0.018 | 0.023  | 0.018 |
| rs8036817  | 15 | 40970724  | A | C | 0.012 | 0.002 | 0.000  | 0.013 | 0.004  | 0.016 | 0.002  | 0.016 |
| rs12440605 | 15 | 42102285  | A | G | 0.012 | 0.002 | -0.023 | 0.012 | -0.016 | 0.016 | -0.033 | 0.016 |
| rs3736485  | 15 | 51748610  | A | G | 0.012 | 0.002 | 0.011  | 0.013 | 0.014  | 0.016 | 0.009  | 0.016 |
| rs2456530  | 15 | 53091553  | T | C | 0.016 | 0.003 | 0.012  | 0.019 | 0.010  | 0.024 | 0.016  | 0.024 |
| rs12595496 | 15 | 56528806  | G | A | 0.018 | 0.003 | -0.045 | 0.019 | -0.058 | 0.024 | -0.026 | 0.024 |
| rs1657930  | 15 | 57120989  | G | A | 0.013 | 0.002 | -0.007 | 0.015 | 0.005  | 0.020 | -0.012 | 0.019 |
| rs12440695 | 15 | 62435156  | C | T | 0.010 | 0.002 | -0.002 | 0.013 | -0.006 | 0.017 | 0.008  | 0.016 |
| rs11071759 | 15 | 63922474  | T | C | 0.010 | 0.002 | -0.034 | 0.013 | -0.048 | 0.016 | -0.028 | 0.016 |
| rs1440372  | 15 | 67033151  | C | T | 0.014 | 0.002 | -0.015 | 0.014 | -0.013 | 0.018 | -0.017 | 0.018 |
| rs8043060  | 15 | 67661784  | G | A | 0.017 | 0.002 | 0.046  | 0.015 | 0.053  | 0.019 | 0.044  | 0.019 |
| rs8039418  | 15 | 73441432  | C | T | 0.011 | 0.002 | -0.011 | 0.013 | -0.022 | 0.016 | -0.008 | 0.016 |
| rs7183908  | 15 | 74329193  | C | T | 0.016 | 0.002 | 0.011  | 0.012 | 0.000  | 0.016 | 0.012  | 0.016 |
| rs936226   | 15 | 75069282  | T | C | 0.011 | 0.002 | 0.013  | 0.014 | 0.010  | 0.018 | 0.018  | 0.018 |
| rs12593088 | 15 | 81058640  | G | A | 0.013 | 0.002 | 0.012  | 0.014 | 0.022  | 0.018 | 0.006  | 0.017 |
| rs12101386 | 15 | 92571283  | G | T | 0.014 | 0.002 | 0.013  | 0.015 | 0.046  | 0.020 | -0.013 | 0.019 |
| rs8024294  | 15 | 94023132  | A | G | 0.018 | 0.003 | -0.007 | 0.021 | -0.013 | 0.027 | -0.009 | 0.026 |
| rs2862867  | 15 | 100268584 | T | C | 0.011 | 0.002 | 0.019  | 0.013 | 0.011  | 0.017 | 0.028  | 0.016 |
| rs3747579  | 16 | 4445327   | C | T | 0.015 | 0.002 | 0.010  | 0.014 | 0.006  | 0.018 | 0.015  | 0.018 |
| rs7200819  | 16 | 4945985   | G | A | 0.015 | 0.003 | 0.025  | 0.018 | 0.020  | 0.024 | 0.022  | 0.023 |

|             |    |          |   |   |       |       |        |       |        |       |        |       |
|-------------|----|----------|---|---|-------|-------|--------|-------|--------|-------|--------|-------|
| rs4782289   | 16 | 19859332 | G | A | 0.015 | 0.003 | 0.029  | 0.018 | 0.049  | 0.024 | 0.026  | 0.023 |
| rs7186893   | 16 | 24806420 | G | T | 0.014 | 0.002 | 0.038  | 0.014 | 0.046  | 0.018 | 0.034  | 0.018 |
| rs2650494   | 16 | 28318440 | A | G | 0.011 | 0.002 | 0.052  | 0.013 | 0.052  | 0.017 | 0.043  | 0.017 |
| rs2008514   | 16 | 28825605 | A | G | 0.017 | 0.002 | 0.094  | 0.013 | 0.113  | 0.016 | 0.073  | 0.016 |
| rs4788204   | 16 | 29995218 | A | G | 0.017 | 0.002 | -0.014 | 0.012 | -0.022 | 0.016 | -0.006 | 0.016 |
| rs2047937   | 16 | 49864791 | C | T | 0.011 | 0.002 | 0.000  | 0.013 | -0.016 | 0.016 | 0.007  | 0.016 |
| rs1421085   | 16 | 53800954 | C | T | 0.040 | 0.002 | 0.026  | 0.013 | 0.039  | 0.016 | 0.014  | 0.016 |
| rs889398    | 16 | 69556715 | C | T | 0.017 | 0.002 | 0.024  | 0.013 | 0.025  | 0.016 | 0.026  | 0.016 |
| rs2925979   | 16 | 81534790 | T | C | 0.022 | 0.002 | -0.036 | 0.014 | -0.013 | 0.018 | -0.049 | 0.017 |
| rs7196397   | 16 | 82874522 | T | C | 0.013 | 0.002 | 0.046  | 0.013 | 0.092  | 0.017 | -0.001 | 0.017 |
| rs7198287   | 16 | 85258191 | C | T | 0.014 | 0.002 | 0.021  | 0.015 | 0.001  | 0.020 | -0.042 | 0.020 |
| rs8070737   | 17 | 3981066  | T | G | 0.016 | 0.002 | 0.002  | 0.016 | 0.023  | 0.021 | -0.014 | 0.021 |
| rs858519    | 17 | 7531965  | T | C | 0.012 | 0.002 | 0.011  | 0.013 | 0.035  | 0.017 | -0.008 | 0.016 |
| rs12947517  | 17 | 17539278 | C | T | 0.014 | 0.002 | 0.029  | 0.013 | 0.013  | 0.017 | 0.046  | 0.016 |
| rs672356    | 17 | 18266567 | G | A | 0.013 | 0.002 | 0.006  | 0.014 | 0.002  | 0.018 | 0.016  | 0.018 |
| rs7213608   | 17 | 21279289 | C | T | 0.017 | 0.002 | -0.017 | 0.014 | -0.015 | 0.018 | -0.019 | 0.017 |
| rs2306589   | 17 | 34848874 | T | C | 0.016 | 0.002 | 0.023  | 0.012 | 0.010  | 0.016 | 0.038  | 0.016 |
| rs72820838  | 17 | 40113631 | T | C | 0.025 | 0.004 | -0.053 | 0.031 | -0.027 | 0.041 | -0.062 | 0.039 |
| rs591939    | 17 | 40698075 | G | A | 0.018 | 0.002 | -0.068 | 0.015 | -0.076 | 0.019 | -0.064 | 0.019 |
| rs62064595  | 17 | 43460374 | G | A | 0.021 | 0.003 | -0.038 | 0.019 | -0.038 | 0.024 | -0.041 | 0.024 |
| rs62063286  | 17 | 44041987 | T | C | 0.024 | 0.002 | 0.011  | 0.018 | 0.016  | 0.023 | 0.002  | 0.024 |
| rs62074125  | 17 | 44852612 | A | C | 0.020 | 0.002 | 0.011  | 0.016 | 0.029  | 0.021 | -0.008 | 0.021 |
| rs11079810  | 17 | 46227846 | C | T | 0.017 | 0.003 | -0.064 | 0.020 | -0.047 | 0.026 | -0.081 | 0.026 |
| rs12450225  | 17 | 46592413 | G | A | 0.011 | 0.002 | 0.008  | 0.012 | 0.018  | 0.016 | -0.004 | 0.016 |
| rs9905140   | 17 | 59496238 | T | C | 0.011 | 0.002 | 0.021  | 0.013 | 0.015  | 0.017 | 0.034  | 0.017 |
| rs8075273   | 17 | 61728881 | C | A | 0.014 | 0.002 | -0.017 | 0.014 | -0.001 | 0.018 | -0.038 | 0.017 |
| rs12602912  | 17 | 65870073 | T | C | 0.018 | 0.002 | -0.028 | 0.016 | -0.005 | 0.020 | -0.049 | 0.020 |
| rs9897538   | 17 | 68432122 | A | C | 0.016 | 0.002 | -0.022 | 0.012 | -0.033 | 0.016 | -0.006 | 0.016 |
| rs9988      | 17 | 73230856 | T | C | 0.015 | 0.002 | 0.006  | 0.016 | 0.014  | 0.021 | 0.009  | 0.021 |
| rs10512605  | 17 | 74212382 | T | C | 0.023 | 0.003 | -0.020 | 0.023 | -0.040 | 0.029 | 0.030  | 0.029 |
| rs4239275   | 17 | 79923718 | T | C | 0.012 | 0.002 | 0.002  | 0.014 | 0.016  | 0.018 | -0.009 | 0.017 |
| rs3810068   | 18 | 2846499  | T | C | 0.016 | 0.002 | 0.000  | 0.014 | 0.009  | 0.018 | -0.008 | 0.019 |
| rs1787013   | 18 | 13072979 | C | T | 0.011 | 0.002 | 0.017  | 0.012 | 0.033  | 0.016 | 0.012  | 0.016 |
| rs62095889  | 18 | 21069068 | G | A | 0.017 | 0.002 | 0.002  | 0.013 | 0.019  | 0.017 | -0.015 | 0.017 |
| rs10164099  | 18 | 34690744 | C | T | 0.015 | 0.003 | -0.016 | 0.018 | -0.007 | 0.023 | -0.015 | 0.023 |
| rs8096564   | 18 | 39910592 | T | G | 0.011 | 0.002 | 0.011  | 0.014 | 0.005  | 0.017 | 0.010  | 0.017 |
| rs1158805   | 18 | 40736590 | C | A | 0.013 | 0.002 | -0.010 | 0.013 | -0.029 | 0.016 | -0.005 | 0.016 |
| rs9951872   | 18 | 46678832 | A | G | 0.021 | 0.002 | -0.026 | 0.017 | -0.052 | 0.022 | -0.013 | 0.022 |
| rs7235891   | 18 | 53454774 | C | T | 0.012 | 0.002 | -0.023 | 0.012 | -0.030 | 0.016 | -0.022 | 0.016 |
| rs6567160   | 18 | 57829135 | C | T | 0.026 | 0.002 | 0.006  | 0.015 | 0.030  | 0.019 | -0.010 | 0.019 |
| rs112099489 | 18 | 58417964 | C | T | 0.044 | 0.008 | -0.111 | 0.054 | -0.103 | 0.069 | -0.152 | 0.069 |
| rs28434748  | 18 | 63306008 | G | A | 0.015 | 0.002 | 0.021  | 0.015 | 0.046  | 0.020 | 0.008  | 0.020 |
| rs12459350  | 19 | 2176586  | A | G | 0.013 | 0.002 | 0.012  | 0.012 | 0.033  | 0.016 | 0.000  | 0.016 |
| rs1035942   | 19 | 7199803  | A | G | 0.012 | 0.002 | -0.027 | 0.014 | -0.013 | 0.018 | -0.035 | 0.018 |
| rs12608504  | 19 | 18389135 | A | G | 0.025 | 0.002 | 0.021  | 0.013 | 0.011  | 0.017 | 0.038  | 0.016 |
| rs4808845   | 19 | 18812024 | A | G | 0.012 | 0.002 | 0.002  | 0.013 | 0.008  | 0.017 | 0.003  | 0.016 |
| rs998732    | 19 | 19378671 | A | G | 0.017 | 0.002 | -0.043 | 0.017 | -0.037 | 0.021 | -0.064 | 0.021 |
| rs7257330   | 19 | 30301823 | A | G | 0.013 | 0.002 | -0.021 | 0.013 | -0.012 | 0.017 | -0.038 | 0.016 |
| rs3786897   | 19 | 33893008 | G | A | 0.024 | 0.002 | 0.004  | 0.013 | 0.013  | 0.016 | -0.010 | 0.016 |
| rs12461964  | 19 | 41341229 | G | A | 0.013 | 0.002 | 0.003  | 0.013 | -0.005 | 0.017 | 0.008  | 0.017 |
| rs429358    | 19 | 45411941 | T | C | 0.035 | 0.003 | -0.010 | 0.019 | -0.005 | 0.024 | 0.007  | 0.024 |

Body fat percentage

|             |    |           |   |   |       |       |        |       |        |       |        |       |
|-------------|----|-----------|---|---|-------|-------|--------|-------|--------|-------|--------|-------|
| rs11672660  | 19 | 46180184  | C | T | 0.021 | 0.002 | 0.019  | 0.016 | 0.021  | 0.021 | 0.027  | 0.020 |
| rs3810291   | 19 | 47569003  | A | G | 0.012 | 0.002 | -0.025 | 0.013 | 0.006  | 0.017 | -0.060 | 0.017 |
| rs11084399  | 19 | 56000492  | C | T | 0.011 | 0.002 | -0.011 | 0.013 | 0.002  | 0.017 | -0.023 | 0.017 |
| rs805770    | 20 | 5668714   | T | C | 0.018 | 0.002 | -0.009 | 0.013 | 0.021  | 0.017 | -0.032 | 0.017 |
| rs979012    | 20 | 6623374   | T | C | 0.012 | 0.002 | -0.024 | 0.013 | -0.018 | 0.017 | -0.022 | 0.017 |
| rs7267979   | 20 | 25298087  | A | G | 0.010 | 0.002 | -0.003 | 0.013 | 0.030  | 0.016 | -0.026 | 0.016 |
| rs143384    | 20 | 34025756  | A | G | 0.016 | 0.002 | -0.015 | 0.013 | -0.004 | 0.017 | -0.028 | 0.016 |
| rs4812700   | 20 | 41989051  | C | T | 0.018 | 0.003 | 0.023  | 0.019 | 0.034  | 0.024 | 0.022  | 0.024 |
| rs2236519   | 20 | 45529571  | A | G | 0.021 | 0.002 | 0.022  | 0.013 | 0.019  | 0.017 | 0.028  | 0.016 |
| rs3092781   | 20 | 45789953  | C | T | 0.015 | 0.002 | -0.001 | 0.012 | 0.004  | 0.016 | -0.010 | 0.016 |
| rs6021889   | 20 | 50982870  | A | G | 0.020 | 0.002 | 0.026  | 0.014 | 0.043  | 0.018 | 0.011  | 0.018 |
| rs910382    | 20 | 51699189  | G | A | 0.017 | 0.002 | -0.003 | 0.012 | 0.008  | 0.016 | -0.018 | 0.016 |
| rs1328757   | 20 | 56135199  | T | C | 0.011 | 0.002 | -0.011 | 0.012 | 0.005  | 0.016 | -0.021 | 0.016 |
| rs28451064  | 21 | 35593827  | A | G | 0.018 | 0.003 | -0.007 | 0.019 | 0.019  | 0.025 | -0.011 | 0.024 |
| rs2836179   | 21 | 39544159  | G | A | 0.013 | 0.002 | 0.028  | 0.013 | 0.044  | 0.016 | 0.013  | 0.016 |
| rs2838006   | 21 | 42653567  | C | T | 0.011 | 0.002 | 0.019  | 0.013 | 0.049  | 0.017 | -0.001 | 0.017 |
| rs510197    | 22 | 27584316  | G | A | 0.015 | 0.002 | 0.002  | 0.016 | 0.000  | 0.021 | 0.010  | 0.020 |
| rs2294239   | 22 | 29449477  | A | G | 0.020 | 0.002 | 0.028  | 0.013 | 0.047  | 0.016 | 0.012  | 0.016 |
| rs713770    | 22 | 35667975  | A | G | 0.012 | 0.002 | -0.058 | 0.013 | -0.033 | 0.017 | -0.076 | 0.017 |
| rs8141715   | 22 | 47214749  | G | T | 0.014 | 0.002 | 0.002  | 0.014 | 0.005  | 0.018 | -0.008 | 0.018 |
| rs12124126  | 1  | 6660349   | A | G | 0.012 | 0.002 | -0.017 | 0.013 | -0.013 | 0.017 | -0.018 | 0.017 |
| rs4908677   | 1  | 7738180   | T | C | 0.011 | 0.002 | -0.011 | 0.013 | -0.010 | 0.016 | -0.015 | 0.016 |
| rs159961    | 1  | 8484228   | T | C | 0.012 | 0.002 | 0.027  | 0.013 | 0.037  | 0.017 | 0.022  | 0.017 |
| rs1318408   | 1  | 11925781  | G | A | 0.016 | 0.003 | -0.035 | 0.020 | -0.026 | 0.025 | -0.040 | 0.025 |
| rs3766823   | 1  | 32197257  | A | G | 0.017 | 0.002 | -0.022 | 0.017 | -0.016 | 0.022 | -0.029 | 0.021 |
| rs2050256   | 1  | 32204683  | G | A | 0.016 | 0.002 | -0.025 | 0.017 | -0.021 | 0.022 | -0.031 | 0.021 |
| rs6686901   | 1  | 42436054  | C | T | 0.012 | 0.002 | -0.002 | 0.012 | 0.000  | 0.016 | 0.001  | 0.016 |
| rs138556772 | 1  | 46174888  | G | A | 0.027 | 0.004 | -0.049 | 0.034 | -0.020 | 0.044 | -0.059 | 0.043 |
| rs1167309   | 1  | 49997674  | C | T | 0.014 | 0.002 | -0.049 | 0.013 | -0.043 | 0.017 | -0.053 | 0.017 |
| rs12566626  | 1  | 50499636  | T | C | 0.013 | 0.002 | -0.048 | 0.013 | -0.041 | 0.017 | -0.050 | 0.017 |
| rs1013293   | 1  | 62570321  | G | A | 0.014 | 0.002 | -0.009 | 0.013 | 0.001  | 0.016 | -0.014 | 0.016 |
| rs12140153  | 1  | 62579891  | G | T | 0.025 | 0.003 | 0.042  | 0.024 | 0.071  | 0.031 | 0.026  | 0.030 |
| rs2186120   | 1  | 66453163  | A | G | 0.010 | 0.002 | -0.010 | 0.012 | -0.018 | 0.016 | 0.001  | 0.016 |
| rs2815764   | 1  | 72754123  | G | A | 0.020 | 0.002 | 0.015  | 0.016 | 0.010  | 0.021 | 0.003  | 0.020 |
| rs12039708  | 1  | 77947009  | T | C | 0.016 | 0.002 | -0.029 | 0.016 | -0.059 | 0.021 | 0.010  | 0.021 |
| rs34517439  | 1  | 78450517  | A | C | 0.021 | 0.003 | -0.068 | 0.021 | -0.125 | 0.027 | -0.013 | 0.026 |
| rs6688826   | 1  | 80812329  | C | T | 0.011 | 0.002 | 0.018  | 0.014 | 0.035  | 0.018 | 0.014  | 0.017 |
| rs2181375   | 1  | 96940119  | G | A | 0.015 | 0.002 | -0.008 | 0.013 | -0.013 | 0.016 | -0.008 | 0.016 |
| rs12072739  | 1  | 98315893  | G | A | 0.014 | 0.002 | 0.004  | 0.015 | 0.013  | 0.019 | -0.009 | 0.019 |
| rs2077569   | 1  | 103350876 | G | A | 0.011 | 0.002 | 0.004  | 0.013 | -0.005 | 0.016 | 0.014  | 0.016 |
| rs1730858   | 1  | 107619244 | T | C | 0.011 | 0.002 | -0.046 | 0.013 | -0.025 | 0.017 | -0.057 | 0.017 |
| rs17024393  | 1  | 110154688 | C | T | 0.047 | 0.006 | -0.057 | 0.039 | -0.058 | 0.050 | -0.055 | 0.049 |
| rs2306937   | 1  | 113246506 | C | T | 0.015 | 0.002 | -0.052 | 0.015 | -0.067 | 0.020 | -0.030 | 0.020 |
| rs11205303  | 1  | 149906413 | C | T | 0.017 | 0.002 | 0.004  | 0.013 | 0.013  | 0.017 | -0.004 | 0.017 |
| rs143453062 | 1  | 150340182 | A | G | 0.031 | 0.004 | -0.027 | 0.030 | -0.019 | 0.038 | -0.028 | 0.038 |
| rs114529840 | 1  | 150457517 | T | G | 0.031 | 0.004 | -0.033 | 0.031 | -0.031 | 0.039 | -0.024 | 0.039 |
| rs146468719 | 1  | 151000790 | A | C | 0.013 | 0.002 | 0.059  | 0.017 | 0.062  | 0.021 | 0.050  | 0.021 |
| rs35154152  | 1  | 155172725 | T | C | 0.020 | 0.003 | -0.027 | 0.020 | -0.027 | 0.026 | -0.037 | 0.026 |
| rs61813324  | 1  | 156049877 | T | C | 0.017 | 0.003 | -0.012 | 0.020 | -0.014 | 0.026 | -0.013 | 0.026 |
| rs148137538 | 1  | 173399677 | A | G | 0.034 | 0.006 | -0.024 | 0.045 | -0.065 | 0.057 | 0.021  | 0.058 |
| rs77560793  | 1  | 175001179 | G | A | 0.031 | 0.005 | 0.000  | 0.037 | -0.031 | 0.047 | 0.020  | 0.047 |



|             |   |           |   |   |       |       |        |       |        |       |        |       |
|-------------|---|-----------|---|---|-------|-------|--------|-------|--------|-------|--------|-------|
| rs543874    | 1 | 177889480 | G | A | 0.028 | 0.002 | -0.027 | 0.016 | -0.004 | 0.020 | -0.045 | 0.020 |
| rs9425633   | 1 | 184657251 | C | T | 0.012 | 0.002 | -0.014 | 0.012 | -0.016 | 0.016 | -0.018 | 0.016 |
| rs672313    | 1 | 195142845 | G | A | 0.014 | 0.002 | 0.004  | 0.015 | 0.005  | 0.020 | 0.008  | 0.019 |
| rs2678204   | 1 | 201800511 | G | T | 0.014 | 0.002 | 0.020  | 0.013 | 0.019  | 0.017 | 0.022  | 0.017 |
| rs11119208  | 1 | 209211968 | A | G | 0.011 | 0.002 | 0.004  | 0.013 | 0.007  | 0.016 | 0.004  | 0.016 |
| rs78508049  | 1 | 210344884 | C | T | 0.014 | 0.002 | 0.011  | 0.016 | -0.018 | 0.020 | 0.038  | 0.020 |
| rs2494196   | 1 | 219762581 | A | C | 0.022 | 0.002 | 0.021  | 0.014 | 0.006  | 0.018 | 0.046  | 0.018 |
| rs12133169  | 1 | 219792380 | A | G | 0.018 | 0.002 | 0.019  | 0.015 | -0.002 | 0.020 | 0.043  | 0.019 |
| rs12042959  | 1 | 243533273 | A | G | 0.016 | 0.002 | -0.019 | 0.018 | 0.003  | 0.023 | -0.020 | 0.023 |
| rs62106258  | 2 | 417167    | T | C | 0.049 | 0.004 | 0.011  | 0.032 | 0.042  | 0.042 | -0.021 | 0.040 |
| rs13393304  | 2 | 637830    | G | A | 0.028 | 0.002 | -0.023 | 0.016 | -0.010 | 0.021 | -0.031 | 0.021 |
| rs11096549  | 2 | 16607101  | T | C | 0.012 | 0.002 | -0.007 | 0.014 | -0.008 | 0.018 | -0.017 | 0.018 |
| rs141240885 | 2 | 24449850  | T | G | 0.024 | 0.004 | 0.001  | 0.027 | 0.026  | 0.036 | -0.028 | 0.034 |
| rs6752378   | 2 | 25150116  | A | C | 0.022 | 0.002 | 0.080  | 0.012 | 0.106  | 0.016 | 0.057  | 0.016 |
| rs76286777  | 2 | 25195577  | C | T | 0.023 | 0.002 | 0.100  | 0.015 | 0.125  | 0.020 | 0.077  | 0.019 |
| rs1731260   | 2 | 26953354  | T | G | 0.012 | 0.002 | 0.002  | 0.012 | -0.020 | 0.016 | 0.020  | 0.016 |
| rs11678385  | 2 | 30492847  | G | A | 0.010 | 0.002 | 0.027  | 0.013 | 0.045  | 0.016 | 0.012  | 0.016 |
| rs10172196  | 2 | 36780549  | A | G | 0.013 | 0.002 | -0.006 | 0.014 | 0.005  | 0.017 | -0.002 | 0.017 |
| rs10169594  | 2 | 41637688  | C | T | 0.013 | 0.002 | 0.032  | 0.013 | 0.037  | 0.017 | 0.032  | 0.017 |
| rs113019802 | 2 | 46884824  | G | A | 0.014 | 0.002 | -0.009 | 0.015 | 0.011  | 0.019 | -0.023 | 0.019 |
| rs2436772   | 2 | 47283557  | G | A | 0.015 | 0.002 | 0.014  | 0.015 | 0.033  | 0.020 | 0.003  | 0.020 |
| rs13406839  | 2 | 50735433  | A | G | 0.011 | 0.002 | 0.003  | 0.013 | -0.004 | 0.016 | 0.001  | 0.016 |
| rs13387836  | 2 | 55278559  | T | C | 0.012 | 0.002 | 0.000  | 0.014 | 0.034  | 0.018 | -0.025 | 0.017 |
| rs1559556   | 2 | 57332617  | G | A | 0.011 | 0.002 | 0.013  | 0.013 | 0.016  | 0.017 | 0.009  | 0.016 |
| rs7608397   | 2 | 58769042  | G | T | 0.011 | 0.002 | 0.015  | 0.013 | 0.026  | 0.016 | 0.005  | 0.016 |
| rs11125768  | 2 | 59306564  | T | C | 0.015 | 0.002 | 0.002  | 0.013 | 0.010  | 0.016 | 0.002  | 0.016 |
| rs6739755   | 2 | 59330227  | A | G | 0.015 | 0.002 | 0.006  | 0.013 | 0.014  | 0.016 | 0.007  | 0.016 |
| rs12477088  | 2 | 67841326  | T | C | 0.012 | 0.002 | 0.026  | 0.013 | 0.009  | 0.016 | 0.053  | 0.016 |
| rs3552      | 2 | 69698158  | A | G | 0.013 | 0.002 | -0.004 | 0.013 | -0.011 | 0.016 | -0.009 | 0.016 |
| rs12619178  | 2 | 100838157 | C | T | 0.014 | 0.002 | 0.002  | 0.013 | -0.018 | 0.016 | 0.011  | 0.016 |
| rs6730157   | 2 | 135907088 | A | G | 0.013 | 0.002 | 0.022  | 0.015 | 0.016  | 0.019 | 0.028  | 0.019 |
| rs1446585   | 2 | 136407479 | A | G | 0.015 | 0.002 | 0.011  | 0.015 | 0.017  | 0.019 | 0.007  | 0.019 |
| rs10181181  | 2 | 161087411 | C | T | 0.012 | 0.002 | -0.025 | 0.014 | -0.024 | 0.018 | -0.020 | 0.017 |
| rs6717858   | 2 | 165539661 | C | T | 0.018 | 0.002 | 0.007  | 0.013 | 0.008  | 0.016 | 0.009  | 0.016 |
| rs12477385  | 2 | 166144850 | G | T | 0.012 | 0.002 | -0.023 | 0.015 | -0.022 | 0.020 | -0.021 | 0.019 |
| rs4668314   | 2 | 171631258 | G | T | 0.010 | 0.002 | 0.019  | 0.013 | 0.020  | 0.016 | 0.010  | 0.016 |
| rs2129475   | 2 | 172916772 | G | A | 0.011 | 0.002 | 0.005  | 0.013 | 0.021  | 0.017 | -0.018 | 0.016 |
| rs79869125  | 2 | 176422238 | G | T | 0.019 | 0.003 | 0.020  | 0.020 | 0.012  | 0.026 | 0.021  | 0.026 |
| rs12622267  | 2 | 181568007 | A | G | 0.013 | 0.002 | 0.007  | 0.013 | 0.014  | 0.017 | -0.003 | 0.017 |
| rs7570258   | 2 | 193791720 | C | T | 0.010 | 0.002 | -0.002 | 0.012 | -0.009 | 0.016 | -0.006 | 0.016 |
| rs2043016   | 2 | 198146381 | T | C | 0.011 | 0.002 | 0.027  | 0.013 | 0.048  | 0.017 | 0.003  | 0.017 |
| rs4482463   | 2 | 205375909 | C | A | 0.022 | 0.003 | 0.010  | 0.023 | 0.004  | 0.030 | 0.006  | 0.029 |
| rs2712169   | 2 | 217671349 | G | A | 0.011 | 0.002 | -0.010 | 0.013 | -0.009 | 0.016 | -0.007 | 0.016 |
| rs2943650   | 2 | 227105921 | C | T | 0.015 | 0.002 | 0.017  | 0.013 | 0.011  | 0.017 | 0.024  | 0.016 |
| rs4321353   | 2 | 229003882 | T | G | 0.014 | 0.002 | -0.017 | 0.013 | -0.003 | 0.017 | -0.026 | 0.017 |
| rs10498240  | 2 | 230734531 | A | C | 0.016 | 0.002 | -0.009 | 0.013 | -0.007 | 0.017 | -0.010 | 0.017 |
| rs62246314  | 3 | 9504099   | A | G | 0.017 | 0.003 | 0.012  | 0.020 | 0.017  | 0.026 | 0.010  | 0.026 |
| rs4684847   | 3 | 12386337  | T | C | 0.030 | 0.003 | 0.007  | 0.019 | -0.008 | 0.025 | 0.015  | 0.024 |
| rs7649970   | 3 | 12392272  | T | C | 0.031 | 0.003 | 0.006  | 0.019 | -0.008 | 0.025 | 0.014  | 0.024 |
| rs4684848   | 3 | 12395645  | A | G | 0.030 | 0.003 | 0.003  | 0.019 | -0.009 | 0.025 | 0.010  | 0.024 |
| rs4619804   | 3 | 18674644  | C | A | 0.013 | 0.002 | 0.039  | 0.014 | 0.047  | 0.018 | 0.045  | 0.018 |

|             |   |           |   |   |       |       |        |       |        |       |        |       |
|-------------|---|-----------|---|---|-------|-------|--------|-------|--------|-------|--------|-------|
| rs13062093  | 3 | 35667057  | G | T | 0.012 | 0.002 | 0.010  | 0.013 | 0.017  | 0.016 | 0.000  | 0.016 |
| rs1348252   | 3 | 42418752  | C | T | 0.012 | 0.002 | 0.009  | 0.014 | -0.001 | 0.019 | 0.010  | 0.018 |
| rs7637852   | 3 | 44041777  | A | G | 0.013 | 0.002 | 0.000  | 0.014 | 0.019  | 0.017 | -0.021 | 0.017 |
| rs62259939  | 3 | 49386047  | A | G | 0.013 | 0.002 | -0.101 | 0.013 | -0.140 | 0.016 | -0.060 | 0.016 |
| rs73079014  | 3 | 49863483  | C | T | 0.015 | 0.003 | -0.130 | 0.019 | -0.130 | 0.025 | -0.135 | 0.024 |
| rs3774581   | 3 | 53802748  | A | G | 0.011 | 0.002 | 0.021  | 0.014 | 0.002  | 0.017 | 0.038  | 0.017 |
| rs17639546  | 3 | 61251635  | G | A | 0.014 | 0.002 | 0.016  | 0.018 | -0.008 | 0.023 | 0.038  | 0.023 |
| rs9968060   | 3 | 62471282  | T | C | 0.012 | 0.002 | -0.030 | 0.013 | -0.025 | 0.017 | -0.035 | 0.017 |
| rs66815886  | 3 | 64703394  | T | G | 0.012 | 0.002 | 0.004  | 0.014 | -0.006 | 0.018 | 0.005  | 0.018 |
| rs7630228   | 3 | 71681487  | T | C | 0.011 | 0.002 | 0.005  | 0.013 | 0.009  | 0.017 | 0.002  | 0.016 |
| rs9856109   | 3 | 82563862  | T | C | 0.011 | 0.002 | 0.009  | 0.013 | 0.004  | 0.017 | 0.007  | 0.017 |
| rs114712833 | 3 | 84139974  | C | T | 0.021 | 0.004 | -0.001 | 0.024 | -0.013 | 0.031 | -0.004 | 0.031 |
| rs3911063   | 3 | 85906928  | T | C | 0.013 | 0.002 | -0.032 | 0.013 | -0.042 | 0.017 | -0.030 | 0.017 |
| rs35714284  | 3 | 93529866  | G | A | 0.012 | 0.002 | 0.004  | 0.013 | -0.004 | 0.017 | 0.004  | 0.017 |
| rs1609906   | 3 | 94033599  | G | A | 0.016 | 0.002 | 0.016  | 0.012 | 0.023  | 0.016 | 0.002  | 0.016 |
| rs10934646  | 3 | 123084541 | A | G | 0.013 | 0.002 | 0.014  | 0.013 | 0.020  | 0.017 | 0.017  | 0.016 |
| rs9820766   | 3 | 123264017 | C | T | 0.012 | 0.002 | -0.026 | 0.013 | -0.024 | 0.017 | -0.031 | 0.017 |
| rs9816797   | 3 | 131614595 | G | A | 0.014 | 0.002 | -0.020 | 0.014 | -0.004 | 0.018 | -0.030 | 0.018 |
| rs7635592   | 3 | 131718029 | T | C | 0.016 | 0.002 | 0.008  | 0.015 | 0.013  | 0.020 | 0.019  | 0.020 |
| rs2042864   | 3 | 141178979 | C | T | 0.012 | 0.002 | 0.036  | 0.013 | 0.066  | 0.016 | 0.011  | 0.016 |
| rs1568489   | 3 | 153673681 | G | A | 0.012 | 0.002 | 0.008  | 0.013 | 0.033  | 0.016 | -0.008 | 0.016 |
| rs8192675   | 3 | 170724883 | C | T | 0.011 | 0.002 | -0.009 | 0.014 | -0.009 | 0.018 | -0.011 | 0.017 |
| rs12635614  | 3 | 173113041 | A | G | 0.010 | 0.002 | -0.001 | 0.013 | 0.011  | 0.016 | -0.014 | 0.016 |
| rs2606228   | 3 | 183537759 | A | C | 0.012 | 0.002 | -0.002 | 0.013 | -0.004 | 0.017 | 0.002  | 0.017 |
| rs9867130   | 3 | 185729753 | G | A | 0.016 | 0.003 | -0.005 | 0.018 | -0.008 | 0.024 | 0.002  | 0.023 |
| rs2192527   | 4 | 18329824  | G | A | 0.014 | 0.002 | -0.009 | 0.012 | -0.001 | 0.016 | -0.020 | 0.016 |
| rs28602597  | 4 | 20112947  | A | G | 0.019 | 0.003 | 0.011  | 0.019 | 0.012  | 0.024 | 0.002  | 0.024 |
| rs34811474  | 4 | 25408838  | G | A | 0.014 | 0.002 | 0.032  | 0.016 | 0.047  | 0.021 | 0.030  | 0.021 |
| rs73213501  | 4 | 28514830  | A | C | 0.015 | 0.002 | 0.010  | 0.016 | 0.018  | 0.021 | 0.002  | 0.021 |
| rs10938398  | 4 | 45186139  | A | G | 0.019 | 0.002 | -0.008 | 0.013 | -0.006 | 0.016 | -0.005 | 0.016 |
| rs2102278   | 4 | 52818664  | G | A | 0.011 | 0.002 | 0.007  | 0.014 | 0.018  | 0.018 | 0.009  | 0.017 |
| rs6840236   | 4 | 56289785  | C | T | 0.012 | 0.002 | 0.003  | 0.012 | -0.003 | 0.016 | 0.004  | 0.016 |
| rs2318543   | 4 | 67803263  | A | G | 0.012 | 0.002 | 0.024  | 0.015 | 0.019  | 0.019 | 0.025  | 0.019 |
| rs58125425  | 4 | 73550383  | T | C | 0.023 | 0.004 | -0.017 | 0.026 | -0.041 | 0.034 | 0.004  | 0.033 |
| rs12503232  | 4 | 80911468  | A | C | 0.013 | 0.002 | 0.024  | 0.014 | 0.029  | 0.018 | 0.029  | 0.018 |
| rs7692359   | 4 | 83209346  | T | C | 0.013 | 0.002 | 0.011  | 0.015 | 0.022  | 0.019 | 0.002  | 0.019 |
| rs3796658   | 4 | 89708241  | G | A | 0.012 | 0.002 | 0.000  | 0.012 | -0.001 | 0.016 | 0.007  | 0.016 |
| rs1229984   | 4 | 100239319 | C | T | 0.035 | 0.006 | 0.011  | 0.033 | 0.004  | 0.042 | 0.040  | 0.043 |
| rs13126505  | 4 | 102865304 | A | G | 0.030 | 0.003 | 0.112  | 0.024 | 0.170  | 0.031 | 0.079  | 0.031 |
| rs13107325  | 4 | 103188709 | T | C | 0.037 | 0.003 | 0.113  | 0.023 | 0.201  | 0.028 | 0.033  | 0.030 |
| rs11099020  | 4 | 130724902 | C | T | 0.011 | 0.002 | -0.030 | 0.013 | -0.027 | 0.017 | -0.028 | 0.017 |
| rs1296328   | 4 | 137083193 | A | C | 0.010 | 0.002 | 0.011  | 0.013 | 0.004  | 0.017 | 0.015  | 0.016 |
| rs7720791   | 5 | 50361133  | G | A | 0.011 | 0.002 | -0.011 | 0.014 | 0.008  | 0.017 | -0.027 | 0.017 |
| rs6861649   | 5 | 50864788  | C | T | 0.011 | 0.002 | -0.007 | 0.013 | -0.010 | 0.016 | -0.011 | 0.016 |
| rs157845    | 5 | 55796639  | T | C | 0.012 | 0.002 | 0.002  | 0.014 | -0.010 | 0.019 | 0.020  | 0.018 |
| rs7736910   | 5 | 63040773  | G | A | 0.012 | 0.002 | 0.005  | 0.013 | 0.014  | 0.016 | -0.014 | 0.016 |
| rs6893495   | 5 | 64409378  | T | C | 0.013 | 0.002 | 0.018  | 0.015 | 0.037  | 0.020 | 0.003  | 0.020 |
| rs249612    | 5 | 66200783  | T | C | 0.012 | 0.002 | 0.015  | 0.014 | -0.001 | 0.018 | 0.027  | 0.018 |
| rs4976033   | 5 | 67714246  | A | G | 0.012 | 0.002 | -0.017 | 0.013 | -0.010 | 0.017 | -0.012 | 0.017 |
| rs4704187   | 5 | 74480288  | T | C | 0.014 | 0.002 | 0.009  | 0.013 | -0.011 | 0.017 | 0.027  | 0.016 |
| rs13356670  | 5 | 74673707  | A | G | 0.018 | 0.002 | 0.011  | 0.015 | 0.007  | 0.019 | 0.012  | 0.019 |

|             |   |           |   |   |       |       |        |       |        |       |        |       |
|-------------|---|-----------|---|---|-------|-------|--------|-------|--------|-------|--------|-------|
| rs2307111   | 5 | 75003678  | T | C | 0.017 | 0.002 | 0.009  | 0.013 | -0.011 | 0.016 | 0.030  | 0.016 |
| rs59893724  | 5 | 80830788  | A | G | 0.013 | 0.002 | 0.007  | 0.015 | 0.013  | 0.019 | -0.002 | 0.019 |
| rs34580448  | 5 | 82810884  | T | C | 0.032 | 0.004 | 0.018  | 0.031 | 0.027  | 0.040 | -0.012 | 0.040 |
| rs11951885  | 5 | 86727566  | C | T | 0.036 | 0.006 | -0.030 | 0.040 | -0.043 | 0.051 | -0.023 | 0.051 |
| rs6870983   | 5 | 87697533  | C | T | 0.014 | 0.002 | 0.007  | 0.015 | 0.025  | 0.019 | -0.003 | 0.019 |
| rs34483452  | 5 | 87986314  | A | C | 0.024 | 0.003 | -0.028 | 0.018 | -0.006 | 0.023 | -0.042 | 0.023 |
| rs59399491  | 5 | 92560816  | G | A | 0.013 | 0.002 | 0.008  | 0.016 | -0.010 | 0.020 | 0.027  | 0.020 |
| rs11135450  | 5 | 95554016  | G | A | 0.011 | 0.002 | 0.024  | 0.013 | 0.004  | 0.017 | 0.034  | 0.017 |
| rs254024    | 5 | 103944020 | T | G | 0.010 | 0.002 | 0.013  | 0.012 | 0.002  | 0.016 | 0.017  | 0.016 |
| rs40067     | 5 | 107439012 | G | A | 0.017 | 0.002 | 0.022  | 0.016 | 0.027  | 0.021 | 0.007  | 0.021 |
| rs4502882   | 5 | 153093998 | C | T | 0.012 | 0.002 | 0.000  | 0.013 | 0.029  | 0.017 | -0.028 | 0.017 |
| rs2964481   | 5 | 157892530 | T | C | 0.015 | 0.002 | 0.022  | 0.014 | 0.034  | 0.018 | 0.005  | 0.018 |
| rs245775    | 5 | 170532105 | G | A | 0.013 | 0.002 | -0.015 | 0.014 | -0.005 | 0.018 | -0.020 | 0.018 |
| rs10947793  | 6 | 12142817  | A | G | 0.012 | 0.002 | 0.001  | 0.013 | -0.015 | 0.017 | 0.021  | 0.017 |
| rs1042317   | 6 | 20492995  | T | C | 0.011 | 0.002 | -0.022 | 0.014 | -0.044 | 0.018 | -0.006 | 0.018 |
| rs75499503  | 6 | 26145217  | C | T | 0.025 | 0.002 | -0.043 | 0.015 | -0.023 | 0.020 | -0.053 | 0.019 |
| rs7766641   | 6 | 26184102  | G | A | 0.024 | 0.002 | -0.012 | 0.014 | 0.020  | 0.018 | -0.031 | 0.018 |
| rs72843644  | 6 | 27211601  | A | C | 0.021 | 0.003 | -0.006 | 0.022 | 0.038  | 0.029 | -0.039 | 0.028 |
| rs6902687   | 6 | 28413491  | C | T | 0.010 | 0.002 | -0.023 | 0.013 | 0.006  | 0.017 | -0.051 | 0.017 |
| rs62395827  | 6 | 31786730  | C | T | 0.023 | 0.003 | 0.009  | 0.022 | -0.061 | 0.028 | 0.064  | 0.028 |
| rs1061801   | 6 | 33282338  | A | G | 0.014 | 0.002 | -0.011 | 0.016 | -0.021 | 0.021 | -0.002 | 0.020 |
| rs59137082  | 6 | 33732365  | C | T | 0.012 | 0.002 | -0.013 | 0.014 | -0.006 | 0.019 | -0.025 | 0.018 |
| rs2744956   | 6 | 34618937  | C | T | 0.025 | 0.003 | -0.039 | 0.018 | -0.032 | 0.023 | -0.052 | 0.023 |
| rs9469887   | 6 | 34758940  | T | C | 0.021 | 0.002 | -0.017 | 0.013 | 0.002  | 0.017 | -0.028 | 0.017 |
| rs2064317   | 6 | 35477032  | A | G | 0.015 | 0.002 | 0.043  | 0.013 | 0.044  | 0.017 | 0.034  | 0.017 |
| rs9471333   | 6 | 40362023  | C | T | 0.016 | 0.002 | 0.026  | 0.013 | 0.018  | 0.016 | 0.040  | 0.016 |
| rs73737608  | 6 | 50376763  | G | A | 0.023 | 0.004 | 0.051  | 0.028 | 0.057  | 0.037 | 0.039  | 0.036 |
| rs4715208   | 6 | 50829471  | G | A | 0.017 | 0.002 | -0.015 | 0.014 | -0.021 | 0.018 | -0.020 | 0.018 |
| rs1928185   | 6 | 50935513  | C | T | 0.023 | 0.002 | 0.005  | 0.017 | 0.000  | 0.021 | 0.008  | 0.021 |
| rs1414506   | 6 | 51487416  | T | C | 0.011 | 0.002 | -0.003 | 0.013 | 0.003  | 0.017 | -0.010 | 0.017 |
| rs13191298  | 6 | 70010225  | G | A | 0.016 | 0.003 | 0.028  | 0.019 | 0.039  | 0.024 | 0.016  | 0.024 |
| rs62422090  | 6 | 97944199  | A | G | 0.012 | 0.002 | -0.006 | 0.014 | -0.030 | 0.018 | 0.011  | 0.018 |
| rs9320823   | 6 | 98429337  | C | T | 0.017 | 0.002 | 0.001  | 0.013 | -0.009 | 0.016 | 0.000  | 0.016 |
| rs9375188   | 6 | 98555272  | C | T | 0.017 | 0.002 | 0.008  | 0.012 | 0.012  | 0.016 | -0.005 | 0.016 |
| rs314279    | 6 | 105402083 | C | A | 0.016 | 0.003 | 0.019  | 0.020 | 0.009  | 0.026 | 0.020  | 0.026 |
| rs6927268   | 6 | 108865663 | T | G | 0.014 | 0.002 | -0.010 | 0.015 | -0.020 | 0.020 | -0.004 | 0.020 |
| rs9400479   | 6 | 111826959 | G | T | 0.014 | 0.002 | -0.009 | 0.016 | 0.007  | 0.021 | -0.027 | 0.020 |
| rs111743285 | 6 | 127048230 | T | C | 0.016 | 0.002 | 0.059  | 0.015 | 0.067  | 0.020 | 0.052  | 0.019 |
| rs72959041  | 6 | 127454893 | G | A | 0.025 | 0.004 | 0.026  | 0.031 | -0.018 | 0.039 | 0.090  | 0.039 |
| rs9321191   | 6 | 130165691 | T | C | 0.013 | 0.002 | 0.008  | 0.015 | -0.001 | 0.020 | 0.020  | 0.020 |
| rs72995085  | 6 | 143193971 | T | C | 0.014 | 0.002 | -0.010 | 0.016 | -0.022 | 0.021 | 0.001  | 0.021 |
| rs4709745   | 6 | 164105984 | C | T | 0.011 | 0.002 | 0.015  | 0.013 | 0.013  | 0.017 | 0.010  | 0.017 |
| rs2529050   | 7 | 24595823  | C | T | 0.011 | 0.002 | 0.006  | 0.014 | 0.021  | 0.018 | -0.004 | 0.017 |
| rs10259620  | 7 | 27202289  | A | G | 0.016 | 0.002 | 0.062  | 0.015 | 0.046  | 0.020 | 0.083  | 0.019 |
| rs10264581  | 7 | 27255417  | G | A | 0.025 | 0.004 | 0.041  | 0.026 | 0.054  | 0.034 | 0.032  | 0.033 |
| rs215669    | 7 | 32378979  | G | A | 0.011 | 0.002 | 0.005  | 0.013 | 0.001  | 0.016 | -0.004 | 0.016 |
| rs4549685   | 7 | 39326478  | C | T | 0.013 | 0.002 | -0.004 | 0.013 | -0.002 | 0.017 | 0.005  | 0.017 |
| rs2289379   | 7 | 44804225  | C | T | 0.012 | 0.002 | -0.041 | 0.013 | -0.042 | 0.017 | -0.032 | 0.016 |
| rs6948959   | 7 | 50697051  | G | A | 0.012 | 0.002 | -0.003 | 0.015 | -0.013 | 0.019 | 0.008  | 0.019 |
| rs4718964   | 7 | 70038969  | T | G | 0.012 | 0.002 | -0.010 | 0.013 | -0.014 | 0.016 | -0.003 | 0.016 |
| rs6955671   | 7 | 74489486  | C | T | 0.011 | 0.002 | -0.063 | 0.016 | -0.075 | 0.020 | -0.055 | 0.020 |

|            |    |           |   |   |       |       |        |       |        |       |        |       |
|------------|----|-----------|---|---|-------|-------|--------|-------|--------|-------|--------|-------|
| rs62477684 | 7  | 75101427  | C | T | 0.013 | 0.002 | -0.041 | 0.013 | -0.035 | 0.017 | -0.053 | 0.017 |
| rs3901286  | 7  | 99107727  | C | A | 0.016 | 0.002 | -0.019 | 0.017 | -0.014 | 0.022 | -0.025 | 0.022 |
| rs3847072  | 7  | 105091519 | G | A | 0.012 | 0.002 | -0.017 | 0.016 | -0.013 | 0.021 | -0.027 | 0.021 |
| rs6946860  | 7  | 112953475 | A | G | 0.013 | 0.002 | -0.009 | 0.013 | -0.042 | 0.017 | 0.020  | 0.017 |
| rs80172389 | 7  | 114432036 | G | T | 0.018 | 0.003 | 0.010  | 0.022 | 0.039  | 0.028 | -0.002 | 0.028 |
| rs972283   | 7  | 130466854 | A | G | 0.013 | 0.002 | 0.027  | 0.013 | 0.025  | 0.016 | 0.035  | 0.016 |
| rs6977416  | 7  | 150542711 | G | A | 0.012 | 0.002 | -0.013 | 0.013 | -0.022 | 0.017 | 0.004  | 0.017 |
| rs11782341 | 8  | 4813459   | G | A | 0.014 | 0.002 | -0.010 | 0.016 | -0.007 | 0.020 | -0.017 | 0.020 |
| rs13268133 | 8  | 9731470   | T | C | 0.012 | 0.002 | 0.002  | 0.013 | 0.010  | 0.017 | -0.006 | 0.017 |
| rs11786089 | 8  | 21975521  | G | A | 0.012 | 0.002 | -0.005 | 0.013 | -0.013 | 0.016 | -0.002 | 0.016 |
| rs11781222 | 8  | 23389571  | T | C | 0.017 | 0.003 | 0.032  | 0.018 | -0.005 | 0.023 | 0.059  | 0.023 |
| rs59104534 | 8  | 25666169  | T | C | 0.011 | 0.002 | -0.026 | 0.014 | -0.016 | 0.018 | -0.039 | 0.018 |
| rs2725370  | 8  | 30852826  | T | C | 0.013 | 0.002 | 0.025  | 0.013 | 0.026  | 0.017 | 0.018  | 0.017 |
| rs1808629  | 8  | 73435964  | G | A | 0.016 | 0.002 | -0.018 | 0.013 | -0.005 | 0.017 | -0.026 | 0.017 |
| rs2977345  | 8  | 76725867  | C | T | 0.015 | 0.002 | -0.003 | 0.014 | -0.003 | 0.017 | -0.014 | 0.017 |
| rs10100245 | 8  | 77226919  | A | G | 0.015 | 0.002 | 0.003  | 0.013 | 0.007  | 0.016 | -0.007 | 0.016 |
| rs879256   | 8  | 78893942  | A | G | 0.011 | 0.002 | 0.002  | 0.013 | 0.000  | 0.017 | -0.005 | 0.016 |
| rs2721963  | 8  | 116661174 | A | C | 0.014 | 0.002 | -0.008 | 0.013 | -0.011 | 0.017 | -0.001 | 0.017 |
| rs4876611  | 8  | 116671848 | G | A | 0.016 | 0.002 | -0.018 | 0.014 | -0.024 | 0.018 | -0.006 | 0.018 |
| rs4466418  | 8  | 126323787 | A | G | 0.011 | 0.002 | 0.016  | 0.013 | 0.011  | 0.016 | 0.020  | 0.016 |
| rs2954033  | 8  | 126493746 | G | A | 0.011 | 0.002 | 0.026  | 0.014 | 0.062  | 0.017 | 0.003  | 0.017 |
| rs10959841 | 9  | 11469190  | T | C | 0.011 | 0.002 | 0.009  | 0.013 | 0.019  | 0.016 | -0.002 | 0.016 |
| rs7046483  | 9  | 14777395  | G | A | 0.010 | 0.002 | 0.022  | 0.013 | 0.017  | 0.016 | 0.032  | 0.016 |
| rs10962016 | 9  | 15389970  | G | A | 0.024 | 0.004 | -0.025 | 0.027 | -0.027 | 0.035 | -0.019 | 0.035 |
| rs13292699 | 9  | 15910044  | A | C | 0.021 | 0.002 | 0.008  | 0.013 | 0.009  | 0.016 | 0.009  | 0.016 |
| rs1415475  | 9  | 16591502  | T | C | 0.024 | 0.004 | 0.021  | 0.025 | -0.015 | 0.032 | 0.035  | 0.032 |
| rs10756798 | 9  | 16739763  | C | T | 0.014 | 0.002 | 0.033  | 0.013 | 0.033  | 0.017 | 0.040  | 0.017 |
| rs17770336 | 9  | 28414625  | T | C | 0.015 | 0.002 | 0.017  | 0.013 | 0.024  | 0.017 | 0.015  | 0.017 |
| rs7848702  | 9  | 31210051  | T | C | 0.012 | 0.002 | 0.001  | 0.014 | 0.005  | 0.018 | 0.009  | 0.018 |
| rs10973160 | 9  | 36994969  | C | T | 0.011 | 0.002 | -0.011 | 0.014 | -0.018 | 0.018 | 0.001  | 0.018 |
| rs12339822 | 9  | 92187178  | G | A | 0.014 | 0.002 | -0.010 | 0.013 | -0.020 | 0.016 | 0.000  | 0.016 |
| rs10820739 | 9  | 99263821  | A | G | 0.013 | 0.002 | 0.001  | 0.016 | 0.000  | 0.021 | -0.006 | 0.020 |
| rs11012732 | 10 | 21830104  | G | A | 0.018 | 0.002 | 0.025  | 0.013 | 0.015  | 0.017 | 0.022  | 0.017 |
| rs7078183  | 10 | 70367452  | C | A | 0.010 | 0.002 | -0.010 | 0.013 | 0.008  | 0.016 | -0.021 | 0.016 |
| rs10999456 | 10 | 72413827  | T | C | 0.016 | 0.002 | 0.008  | 0.014 | 0.008  | 0.018 | 0.004  | 0.018 |
| rs10999460 | 10 | 72428283  | T | C | 0.016 | 0.002 | 0.005  | 0.014 | 0.006  | 0.018 | 0.003  | 0.018 |
| rs2002023  | 10 | 76848524  | T | C | 0.012 | 0.002 | 0.007  | 0.013 | 0.013  | 0.016 | -0.003 | 0.016 |
| rs11594905 | 10 | 77659733  | A | G | 0.015 | 0.003 | 0.039  | 0.021 | -0.010 | 0.027 | 0.060  | 0.026 |
| rs10887582 | 10 | 88110792  | C | T | 0.010 | 0.002 | -0.003 | 0.013 | -0.017 | 0.016 | 0.006  | 0.016 |
| rs11187838 | 10 | 96038686  | G | A | 0.014 | 0.002 | -0.020 | 0.013 | -0.009 | 0.016 | -0.021 | 0.016 |
| rs4110517  | 10 | 96650328  | G | A | 0.012 | 0.002 | -0.017 | 0.015 | -0.029 | 0.019 | -0.009 | 0.019 |
| rs577525   | 10 | 99769388  | C | T | 0.014 | 0.002 | 0.023  | 0.013 | 0.053  | 0.016 | 0.006  | 0.016 |
| rs41310284 | 10 | 102447647 | C | A | 0.018 | 0.003 | -0.007 | 0.022 | 0.019  | 0.028 | -0.030 | 0.027 |
| rs6585201  | 10 | 114768783 | G | A | 0.011 | 0.002 | -0.003 | 0.013 | -0.010 | 0.016 | -0.001 | 0.016 |
| rs1225404  | 10 | 114914665 | C | T | 0.011 | 0.002 | 0.003  | 0.014 | 0.010  | 0.018 | 0.001  | 0.018 |
| rs10510025 | 10 | 118650996 | T | C | 0.013 | 0.002 | -0.040 | 0.014 | -0.047 | 0.018 | -0.039 | 0.018 |
| rs4752182  | 10 | 120397131 | A | G | 0.010 | 0.002 | 0.011  | 0.013 | 0.006  | 0.016 | 0.013  | 0.016 |
| rs12218858 | 10 | 126474200 | T | C | 0.010 | 0.002 | 0.049  | 0.013 | 0.056  | 0.016 | 0.038  | 0.016 |
| rs2172131  | 10 | 133978962 | T | C | 0.011 | 0.002 | -0.006 | 0.013 | -0.008 | 0.016 | -0.009 | 0.016 |
| rs11042030 | 11 | 8690718   | T | C | 0.013 | 0.002 | 0.005  | 0.014 | 0.028  | 0.018 | -0.019 | 0.018 |
| rs11042725 | 11 | 10325325  | A | C | 0.011 | 0.002 | -0.001 | 0.013 | 0.001  | 0.016 | 0.007  | 0.016 |

|             |    |           |   |   |       |       |        |       |        |       |        |       |
|-------------|----|-----------|---|---|-------|-------|--------|-------|--------|-------|--------|-------|
| rs10767659  | 11 | 27686196  | G | T | 0.020 | 0.002 | 0.002  | 0.013 | -0.011 | 0.017 | 0.004  | 0.017 |
| rs11030108  | 11 | 27695464  | A | G | 0.021 | 0.002 | -0.004 | 0.014 | -0.021 | 0.018 | 0.002  | 0.017 |
| rs71474196  | 11 | 46977160  | C | T | 0.016 | 0.003 | -0.038 | 0.020 | -0.055 | 0.026 | -0.017 | 0.026 |
| rs7124681   | 11 | 47529947  | A | C | 0.022 | 0.002 | 0.016  | 0.013 | 0.026  | 0.016 | 0.012  | 0.016 |
| rs12146571  | 11 | 48314077  | C | T | 0.014 | 0.002 | 0.021  | 0.018 | 0.005  | 0.022 | 0.044  | 0.023 |
| rs477895    | 11 | 64048912  | T | C | 0.015 | 0.002 | -0.019 | 0.017 | -0.025 | 0.022 | -0.007 | 0.021 |
| rs801742    | 11 | 65914766  | C | A | 0.015 | 0.002 | 0.005  | 0.013 | 0.027  | 0.017 | -0.014 | 0.016 |
| rs1213257   | 11 | 85220773  | C | T | 0.014 | 0.002 | 0.000  | 0.017 | 0.029  | 0.022 | -0.024 | 0.021 |
| rs61903695  | 11 | 89922417  | G | A | 0.012 | 0.002 | 0.010  | 0.014 | 0.020  | 0.019 | 0.006  | 0.018 |
| rs3802851   | 11 | 112912550 | T | C | 0.012 | 0.002 | 0.017  | 0.014 | 0.027  | 0.018 | 0.006  | 0.018 |
| rs719802    | 11 | 113234679 | T | C | 0.011 | 0.002 | 0.001  | 0.013 | -0.009 | 0.017 | 0.000  | 0.016 |
| rs4545564   | 11 | 118937518 | C | T | 0.011 | 0.002 | 0.003  | 0.013 | 0.009  | 0.016 | 0.001  | 0.016 |
| rs10791109  | 11 | 130850377 | G | T | 0.011 | 0.002 | -0.005 | 0.012 | 0.015  | 0.016 | -0.018 | 0.016 |
| rs55726687  | 12 | 991306    | A | G | 0.014 | 0.002 | 0.032  | 0.015 | 0.033  | 0.020 | 0.036  | 0.020 |
| rs765123    | 12 | 2155997   | G | A | 0.012 | 0.002 | -0.018 | 0.016 | -0.018 | 0.020 | -0.014 | 0.020 |
| rs7296615   | 12 | 3350679   | A | G | 0.021 | 0.003 | 0.006  | 0.022 | 0.012  | 0.028 | 0.003  | 0.028 |
| rs12367809  | 12 | 50256063  | T | C | 0.019 | 0.002 | 0.016  | 0.013 | 0.014  | 0.017 | 0.018  | 0.016 |
| rs7132908   | 12 | 50263148  | A | G | 0.019 | 0.002 | 0.013  | 0.013 | 0.012  | 0.017 | 0.011  | 0.016 |
| rs4759318   | 12 | 54420098  | T | C | 0.011 | 0.002 | 0.008  | 0.013 | 0.036  | 0.017 | -0.012 | 0.017 |
| rs704061    | 12 | 89771903  | C | T | 0.014 | 0.002 | -0.008 | 0.012 | 0.021  | 0.016 | -0.035 | 0.016 |
| rs12813149  | 12 | 90142637  | G | A | 0.015 | 0.002 | -0.012 | 0.014 | -0.026 | 0.019 | -0.002 | 0.018 |
| rs7975788   | 12 | 90273927  | G | T | 0.012 | 0.002 | -0.034 | 0.014 | -0.039 | 0.018 | -0.027 | 0.018 |
| rs10777259  | 12 | 91248014  | C | T | 0.010 | 0.002 | -0.011 | 0.012 | -0.022 | 0.016 | -0.001 | 0.016 |
| rs59066241  | 12 | 97925364  | G | T | 0.016 | 0.003 | 0.014  | 0.019 | 0.023  | 0.025 | 0.011  | 0.024 |
| rs11113445  | 12 | 108088682 | G | A | 0.012 | 0.002 | 0.041  | 0.013 | 0.021  | 0.016 | 0.057  | 0.016 |
| rs11609659  | 12 | 108296260 | T | C | 0.014 | 0.002 | -0.016 | 0.015 | 0.012  | 0.019 | -0.045 | 0.019 |
| rs3764002   | 12 | 108618630 | C | T | 0.016 | 0.002 | 0.021  | 0.014 | 0.041  | 0.018 | 0.003  | 0.018 |
| rs10492229  | 12 | 110602173 | T | C | 0.012 | 0.002 | 0.002  | 0.015 | 0.003  | 0.019 | 0.001  | 0.019 |
| rs61945850  | 12 | 120846213 | G | A | 0.032 | 0.005 | -0.013 | 0.035 | -0.005 | 0.046 | -0.018 | 0.044 |
| rs76929617  | 12 | 120867798 | A | G | 0.032 | 0.005 | -0.054 | 0.042 | -0.051 | 0.053 | -0.053 | 0.054 |
| rs75412871  | 12 | 121709430 | C | T | 0.025 | 0.004 | -0.042 | 0.028 | -0.018 | 0.037 | -0.057 | 0.036 |
| rs116861199 | 12 | 122464941 | G | A | 0.025 | 0.003 | 0.055  | 0.028 | 0.034  | 0.035 | 0.102  | 0.036 |
| rs35249105  | 12 | 122507810 | G | A | 0.011 | 0.002 | -0.011 | 0.013 | -0.001 | 0.016 | -0.022 | 0.016 |
| rs147730268 | 12 | 123024476 | G | T | 0.032 | 0.003 | 0.023  | 0.024 | 0.039  | 0.031 | 0.041  | 0.030 |
| rs10773394  | 12 | 123124778 | A | C | 0.013 | 0.002 | 0.015  | 0.013 | 0.012  | 0.017 | 0.024  | 0.017 |
| rs147530811 | 12 | 123817477 | C | A | 0.030 | 0.005 | 0.073  | 0.042 | 0.069  | 0.051 | 0.111  | 0.054 |
| rs7133378   | 12 | 124409502 | A | G | 0.019 | 0.002 | -0.038 | 0.013 | -0.030 | 0.017 | -0.040 | 0.017 |
| rs825452    | 12 | 124509177 | G | A | 0.015 | 0.002 | 0.011  | 0.013 | 0.006  | 0.017 | 0.024  | 0.016 |
| rs11619393  | 13 | 20262266  | C | T | 0.015 | 0.002 | -0.010 | 0.018 | -0.015 | 0.023 | -0.019 | 0.023 |
| rs1928496   | 13 | 31012904  | T | C | 0.012 | 0.002 | 0.000  | 0.015 | 0.004  | 0.019 | -0.002 | 0.018 |
| rs9568867   | 13 | 54107352  | A | G | 0.017 | 0.003 | -0.003 | 0.019 | 0.018  | 0.024 | -0.023 | 0.024 |
| rs7982447   | 13 | 54453811  | C | T | 0.015 | 0.002 | -0.023 | 0.015 | -0.035 | 0.020 | -0.015 | 0.019 |
| rs7319102   | 13 | 58252801  | G | A | 0.013 | 0.002 | -0.001 | 0.015 | 0.004  | 0.019 | 0.004  | 0.019 |
| rs11839227  | 13 | 59280705  | T | C | 0.014 | 0.002 | 0.003  | 0.016 | 0.007  | 0.021 | -0.013 | 0.020 |
| rs1218307   | 13 | 79417832  | G | A | 0.011 | 0.002 | 0.009  | 0.013 | 0.014  | 0.016 | 0.008  | 0.016 |
| rs1441264   | 13 | 79580919  | A | G | 0.012 | 0.002 | -0.024 | 0.013 | -0.032 | 0.017 | -0.017 | 0.016 |
| rs6491427   | 13 | 99113166  | A | G | 0.015 | 0.002 | 0.030  | 0.014 | 0.035  | 0.018 | 0.021  | 0.018 |
| rs35413307  | 13 | 112191778 | G | T | 0.012 | 0.002 | 0.001  | 0.013 | -0.021 | 0.017 | 0.019  | 0.017 |
| rs9522279   | 13 | 112221296 | T | C | 0.013 | 0.002 | 0.015  | 0.013 | 0.004  | 0.016 | 0.017  | 0.016 |
| rs4981693   | 14 | 29680331  | A | G | 0.014 | 0.002 | -0.014 | 0.015 | -0.012 | 0.019 | -0.018 | 0.019 |
| rs1959430   | 14 | 30184162  | C | T | 0.010 | 0.002 | 0.018  | 0.013 | 0.019  | 0.016 | 0.020  | 0.016 |

|             |    |           |   |   |       |       |        |       |        |       |        |       |
|-------------|----|-----------|---|---|-------|-------|--------|-------|--------|-------|--------|-------|
| rs61979560  | 14 | 30727033  | A | C | 0.012 | 0.002 | -0.002 | 0.015 | 0.009  | 0.019 | -0.022 | 0.019 |
| rs2239647   | 14 | 33292743  | A | C | 0.013 | 0.002 | -0.012 | 0.013 | -0.011 | 0.017 | -0.017 | 0.016 |
| rs72681698  | 14 | 51207741  | T | C | 0.050 | 0.008 | 0.015  | 0.071 | 0.116  | 0.092 | -0.020 | 0.089 |
| rs61975142  | 14 | 59402590  | G | A | 0.015 | 0.002 | 0.035  | 0.017 | 0.025  | 0.021 | 0.041  | 0.021 |
| rs12890931  | 14 | 69753369  | G | T | 0.012 | 0.002 | 0.000  | 0.013 | 0.015  | 0.017 | -0.016 | 0.016 |
| rs2370982   | 14 | 79890677  | T | C | 0.019 | 0.002 | 0.032  | 0.015 | 0.017  | 0.020 | 0.039  | 0.019 |
| rs1075472   | 14 | 93108131  | A | G | 0.015 | 0.002 | 0.024  | 0.016 | 0.047  | 0.021 | 0.008  | 0.020 |
| rs6575340   | 14 | 94023972  | A | G | 0.015 | 0.002 | 0.004  | 0.013 | 0.004  | 0.017 | -0.001 | 0.016 |
| rs3803286   | 14 | 103246470 | A | G | 0.013 | 0.002 | 0.017  | 0.013 | 0.006  | 0.017 | 0.036  | 0.017 |
| rs8042404   | 15 | 31680016  | A | G | 0.012 | 0.002 | -0.002 | 0.014 | 0.011  | 0.018 | -0.014 | 0.018 |
| rs28538451  | 15 | 41455769  | A | C | 0.013 | 0.002 | -0.047 | 0.014 | 0.009  | 0.018 | -0.091 | 0.018 |
| rs3751585   | 15 | 51741056  | A | G | 0.013 | 0.002 | 0.013  | 0.016 | 0.030  | 0.020 | -0.009 | 0.020 |
| rs117632017 | 15 | 52260107  | A | G | 0.031 | 0.005 | 0.025  | 0.038 | 0.035  | 0.050 | 0.046  | 0.048 |
| rs2165991   | 15 | 53101700  | G | A | 0.012 | 0.002 | 0.006  | 0.014 | 0.015  | 0.018 | -0.003 | 0.018 |
| rs17291497  | 15 | 67362994  | C | T | 0.010 | 0.002 | 0.012  | 0.013 | 0.047  | 0.016 | -0.018 | 0.016 |
| rs7166081   | 15 | 67492301  | A | G | 0.015 | 0.002 | 0.047  | 0.015 | 0.053  | 0.019 | 0.046  | 0.019 |
| rs16951304  | 15 | 68089618  | T | C | 0.020 | 0.002 | -0.001 | 0.015 | 0.003  | 0.020 | -0.001 | 0.019 |
| rs7164727   | 15 | 73093991  | T | C | 0.015 | 0.002 | -0.017 | 0.013 | -0.004 | 0.017 | -0.027 | 0.017 |
| rs2660824   | 15 | 73618309  | C | T | 0.011 | 0.002 | -0.002 | 0.013 | -0.001 | 0.016 | -0.010 | 0.016 |
| rs34769775  | 15 | 80989172  | C | T | 0.011 | 0.002 | 0.012  | 0.014 | 0.034  | 0.018 | -0.002 | 0.018 |
| rs6602997   | 15 | 84521398  | T | C | 0.022 | 0.002 | -0.015 | 0.014 | -0.022 | 0.018 | -0.005 | 0.017 |
| rs2135877   | 15 | 84663107  | G | A | 0.021 | 0.002 | 0.003  | 0.013 | -0.007 | 0.017 | 0.010  | 0.017 |
| rs62021171  | 15 | 85128550  | G | A | 0.016 | 0.002 | -0.034 | 0.016 | -0.047 | 0.020 | -0.018 | 0.020 |
| rs1879529   | 15 | 89414295  | G | T | 0.015 | 0.002 | -0.005 | 0.014 | -0.010 | 0.019 | -0.001 | 0.018 |
| rs57221746  | 15 | 99230035  | G | A | 0.012 | 0.002 | 0.015  | 0.015 | 0.024  | 0.019 | 0.009  | 0.019 |
| rs72755233  | 15 | 100692953 | G | A | 0.017 | 0.003 | 0.024  | 0.022 | 0.011  | 0.028 | 0.026  | 0.028 |
| rs412243    | 16 | 339672    | T | C | 0.012 | 0.002 | -0.007 | 0.013 | 0.006  | 0.017 | -0.024 | 0.016 |
| rs181179291 | 16 | 2787062   | C | A | 0.054 | 0.008 | 0.067  | 0.068 | 0.126  | 0.091 | 0.072  | 0.084 |
| rs879620    | 16 | 4015729   | T | C | 0.016 | 0.002 | -0.032 | 0.013 | -0.038 | 0.017 | -0.029 | 0.017 |
| rs4785955   | 16 | 4297651   | T | G | 0.013 | 0.002 | 0.000  | 0.015 | 0.011  | 0.020 | -0.015 | 0.020 |
| rs7193783   | 16 | 4949608   | A | C | 0.011 | 0.002 | 0.025  | 0.013 | 0.034  | 0.017 | 0.009  | 0.017 |
| rs4474693   | 16 | 20246313  | A | G | 0.017 | 0.003 | 0.047  | 0.018 | 0.062  | 0.024 | 0.028  | 0.023 |
| rs200534    | 16 | 24752641  | A | G | 0.015 | 0.002 | 0.040  | 0.014 | 0.048  | 0.018 | 0.038  | 0.018 |
| rs9939450   | 16 | 28301487  | T | C | 0.014 | 0.002 | 0.032  | 0.013 | 0.029  | 0.017 | 0.026  | 0.016 |
| rs56186137  | 16 | 28825953  | G | A | 0.023 | 0.002 | 0.094  | 0.013 | 0.113  | 0.016 | 0.073  | 0.016 |
| rs72798148  | 16 | 29926552  | T | C | 0.018 | 0.002 | -0.004 | 0.017 | -0.025 | 0.022 | 0.009  | 0.022 |
| rs9746755   | 16 | 30519628  | G | A | 0.010 | 0.002 | 0.006  | 0.014 | 0.003  | 0.017 | 0.010  | 0.017 |
| rs34898535  | 16 | 31025641  | C | T | 0.016 | 0.002 | 0.002  | 0.013 | -0.001 | 0.017 | 0.001  | 0.016 |
| rs11642015  | 16 | 53802494  | T | C | 0.040 | 0.002 | 0.026  | 0.013 | 0.038  | 0.016 | 0.013  | 0.016 |
| rs7202116   | 16 | 53821615  | G | A | 0.039 | 0.002 | 0.024  | 0.013 | 0.040  | 0.016 | 0.008  | 0.016 |
| rs9940346   | 16 | 64716851  | C | T | 0.011 | 0.002 | 0.002  | 0.013 | -0.021 | 0.017 | 0.019  | 0.016 |
| rs11866219  | 16 | 69549749  | A | C | 0.017 | 0.002 | 0.032  | 0.013 | 0.026  | 0.016 | 0.036  | 0.016 |
| rs889398    | 16 | 69556715  | C | T | 0.016 | 0.002 | 0.024  | 0.013 | 0.025  | 0.016 | 0.026  | 0.016 |
| rs7191938   | 16 | 71407530  | G | A | 0.012 | 0.002 | 0.018  | 0.014 | -0.006 | 0.017 | 0.033  | 0.017 |
| rs2012817   | 16 | 72038659  | C | T | 0.011 | 0.002 | -0.028 | 0.013 | -0.057 | 0.017 | 0.002  | 0.017 |
| rs4411525   | 16 | 74595502  | A | C | 0.010 | 0.002 | -0.031 | 0.013 | -0.031 | 0.016 | -0.030 | 0.016 |
| rs55637757  | 16 | 89535888  | C | T | 0.018 | 0.003 | 0.009  | 0.019 | 0.040  | 0.025 | -0.017 | 0.024 |
| rs77733403  | 16 | 90080723  | T | C | 0.015 | 0.002 | -0.005 | 0.018 | -0.014 | 0.023 | 0.002  | 0.022 |
| rs8082551   | 17 | 1310661   | C | T | 0.017 | 0.003 | 0.080  | 0.020 | 0.064  | 0.026 | 0.103  | 0.025 |
| rs4790841   | 17 | 1835482   | C | T | 0.022 | 0.002 | -0.015 | 0.018 | -0.001 | 0.023 | -0.029 | 0.023 |
| rs34356467  | 17 | 3978531   | T | G | 0.014 | 0.002 | 0.001  | 0.016 | 0.023  | 0.021 | -0.015 | 0.021 |

|                           |             |    |           |   |   |       |       |         |        |         |        |         |        |
|---------------------------|-------------|----|-----------|---|---|-------|-------|---------|--------|---------|--------|---------|--------|
|                           | rs9902386   | 17 | 21280185  | T | G | 0.012 | 0.002 | -0.020  | 0.014  | -0.019  | 0.018  | -0.019  | 0.017  |
|                           | rs71371126  | 17 | 28002642  | A | G | 0.012 | 0.002 | 0.005   | 0.013  | -0.014  | 0.017  | 0.023   | 0.017  |
|                           | rs11872020  | 17 | 28553489  | A | G | 0.013 | 0.002 | 0.014   | 0.013  | -0.012  | 0.017  | 0.033   | 0.017  |
|                           | rs2855818   | 17 | 42290015  | A | G | 0.017 | 0.002 | -0.029  | 0.015  | -0.062  | 0.019  | -0.007  | 0.019  |
|                           | rs8074938   | 17 | 43153006  | A | G | 0.011 | 0.002 | 0.025   | 0.013  | 0.031   | 0.017  | 0.028   | 0.017  |
|                           | rs17698176  | 17 | 44819595  | G | T | 0.012 | 0.002 | 0.006   | 0.016  | 0.019   | 0.021  | -0.017  | 0.021  |
|                           | rs208015    | 17 | 46252346  | T | C | 0.025 | 0.003 | 0.004   | 0.024  | -0.035  | 0.032  | 0.033   | 0.031  |
|                           | rs11079852  | 17 | 47095041  | G | A | 0.013 | 0.002 | 0.002   | 0.013  | 0.013   | 0.017  | -0.005  | 0.017  |
|                           | rs12602556  | 17 | 65826861  | G | A | 0.022 | 0.002 | -0.030  | 0.016  | -0.004  | 0.020  | -0.053  | 0.020  |
|                           | rs11150745  | 17 | 78757626  | A | G | 0.013 | 0.002 | 0.008   | 0.013  | 0.011   | 0.017  | -0.002  | 0.017  |
|                           | rs11873650  | 18 | 13163903  | G | A | 0.011 | 0.002 | -0.008  | 0.014  | -0.016  | 0.018  | -0.005  | 0.017  |
|                           | rs111581974 | 18 | 22205000  | C | T | 0.016 | 0.002 | -0.016  | 0.016  | 0.001   | 0.021  | -0.032  | 0.021  |
|                           | rs2052607   | 18 | 40788387  | G | A | 0.015 | 0.002 | -0.002  | 0.013  | -0.030  | 0.017  | 0.012   | 0.017  |
|                           | rs11876574  | 18 | 42595844  | T | C | 0.012 | 0.002 | -0.009  | 0.014  | -0.024  | 0.018  | 0.006   | 0.017  |
|                           | rs12967878  | 18 | 57826570  | C | T | 0.024 | 0.002 | 0.010   | 0.015  | 0.033   | 0.019  | -0.006  | 0.019  |
|                           | rs538656    | 18 | 57850422  | T | G | 0.023 | 0.002 | 0.004   | 0.015  | 0.032   | 0.019  | -0.015  | 0.019  |
|                           | rs111718521 | 18 | 58085845  | G | A | 0.072 | 0.007 | -0.070  | 0.050  | -0.056  | 0.066  | -0.086  | 0.063  |
|                           | rs193239997 | 18 | 58639547  | T | C | 0.046 | 0.007 | -0.060  | 0.048  | -0.017  | 0.064  | -0.135  | 0.061  |
|                           | rs350832    | 19 | 4069426   | A | G | 0.015 | 0.002 | -0.047  | 0.015  | -0.076  | 0.020  | -0.026  | 0.020  |
|                           | rs273507    | 19 | 18221964  | C | A | 0.018 | 0.002 | 0.015   | 0.014  | 0.005   | 0.018  | 0.029   | 0.018  |
|                           | rs10404726  | 19 | 18834514  | C | T | 0.013 | 0.002 | 0.007   | 0.013  | -0.004  | 0.016  | 0.018   | 0.016  |
|                           | rs62104483  | 19 | 30300017  | A | G | 0.013 | 0.002 | -0.009  | 0.013  | -0.001  | 0.017  | -0.024  | 0.017  |
|                           | rs12610925  | 19 | 33880349  | G | A | 0.017 | 0.002 | -0.001  | 0.013  | 0.021   | 0.017  | -0.019  | 0.017  |
|                           | rs33836     | 19 | 34008600  | C | T | 0.017 | 0.002 | 0.020   | 0.013  | 0.047   | 0.016  | -0.002  | 0.016  |
|                           | rs6857      | 19 | 45392254  | C | T | 0.016 | 0.002 | -0.016  | 0.018  | -0.015  | 0.023  | 0.003   | 0.023  |
|                           | rs429358    | 19 | 45411941  | T | C | 0.017 | 0.002 | -0.010  | 0.019  | -0.005  | 0.024  | 0.007   | 0.024  |
|                           | rs11672660  | 19 | 46180184  | C | T | 0.023 | 0.002 | 0.019   | 0.016  | 0.021   | 0.021  | 0.027   | 0.020  |
|                           | rs3810291   | 19 | 47569003  | A | G | 0.012 | 0.002 | -0.025  | 0.013  | 0.006   | 0.017  | -0.060  | 0.017  |
|                           | rs7020      | 20 | 25278600  | A | G | 0.013 | 0.002 | -0.003  | 0.013  | 0.028   | 0.016  | -0.026  | 0.016  |
|                           | rs819168    | 20 | 32903845  | G | T | 0.021 | 0.004 | -0.030  | 0.025  | 0.003   | 0.032  | -0.064  | 0.031  |
|                           | rs17265513  | 20 | 39832628  | C | T | 0.013 | 0.002 | 0.061   | 0.016  | 0.054   | 0.021  | 0.080   | 0.020  |
|                           | rs6103254   | 20 | 41990761  | T | C | 0.016 | 0.003 | 0.025   | 0.019  | 0.034   | 0.024  | 0.026   | 0.024  |
|                           | rs112852122 | 20 | 47498117  | G | A | 0.018 | 0.002 | -0.002  | 0.018  | 0.039   | 0.023  | -0.033  | 0.023  |
|                           | rs73142879  | 20 | 51195932  | C | T | 0.015 | 0.002 | 0.013   | 0.016  | 0.020   | 0.021  | 0.003   | 0.020  |
|                           | rs1056441   | 20 | 62370349  | C | T | 0.013 | 0.002 | 0.117   | 0.014  | 0.126   | 0.018  | 0.100   | 0.017  |
|                           | rs76040172  | 21 | 46488959  | G | A | 0.028 | 0.004 | -0.010  | 0.029  | -0.033  | 0.038  | -0.004  | 0.036  |
|                           | rs394608    | 21 | 46581798  | C | T | 0.013 | 0.002 | 0.022   | 0.012  | 0.019   | 0.016  | 0.016   | 0.016  |
|                           | rs4820325   | 22 | 38599978  | G | A | 0.017 | 0.002 | 0.011   | 0.013  | 0.009   | 0.016  | 0.017   | 0.016  |
|                           | rs202661    | 22 | 41812439  | A | G | 0.013 | 0.002 | 0.050   | 0.015  | 0.068   | 0.019  | 0.039   | 0.019  |
|                           | rs10854853  | 22 | 48874412  | T | G | 0.011 | 0.002 | 0.046   | 0.013  | 0.028   | 0.016  | 0.053   | 0.016  |
| Overall physical activity | rs55657917  | 17 | 43844560  | G | T | 0.037 | 0.005 | -0.045  | 0.016  | -0.057  | 0.020  | -0.041  | 0.020  |
|                           | rs2052607   | 18 | 40788387  | A | G | 0.028 | 0.005 | 0.002   | 0.013  | 0.030   | 0.017  | -0.012  | 0.017  |
| Vitamin D                 | rs6698680   | 1  | 2329661   | A | G | 0.012 | 0.002 | -0.0108 | 0.0131 | -0.0199 | 0.0169 | -0.0116 | 0.0167 |
|                           | rs11203338  | 1  | 17559907  | T | C | 0.021 | 0.002 | 0.0194  | 0.0131 | 0.0112  | 0.0169 | 0.0291  | 0.0166 |
|                           | rs7519574   | 1  | 34726552  | A | G | 0.017 | 0.003 | -0.0069 | 0.0166 | -0.0152 | 0.0215 | 0.0023  | 0.0211 |
|                           | rs7528419   | 1  | 109817192 | G | A | 0.019 | 0.002 | -0.0111 | 0.015  | -0.0168 | 0.0194 | -0.012  | 0.0191 |
|                           | rs3768013   | 1  | 150815411 | G | A | 0.015 | 0.002 | 0.0645  | 0.0129 | 0.0557  | 0.0166 | 0.0659  | 0.0164 |
|                           | rs61816761  | 1  | 152285861 | A | G | 0.125 | 0.007 | 0.0259  | 0.0579 | 0.0557  | 0.0719 | 0.0246  | 0.0743 |
|                           | rs10796941  | 1  | 155284261 | T | C | 0.018 | 0.002 | 0.076   | 0.0142 | 0.0986  | 0.0183 | 0.0565  | 0.0182 |
|                           | rs867772    | 1  | 220972343 | A | G | 0.014 | 0.002 | -0.0333 | 0.0136 | -0.0336 | 0.0174 | -0.0331 | 0.0173 |
|                           | rs12997242  | 2  | 21381177  | G | A | 0.013 | 0.002 | -0.0059 | 0.0125 | -0.0226 | 0.0161 | 0.008   | 0.0159 |

|             |    |           |   |   |       |       |         |        |           |        |          |        |
|-------------|----|-----------|---|---|-------|-------|---------|--------|-----------|--------|----------|--------|
| rs11127048  | 2  | 27752463  | A | G | 0.018 | 0.002 | -0.0618 | 0.0129 | -0.0976   | 0.0167 | -0.0362  | 0.0165 |
| rs6724965   | 2  | 101440151 | A | G | 0.017 | 0.003 | -0.0069 | 0.0163 | -0.0263   | 0.0211 | 0.0057   | 0.0207 |
| rs7569755   | 2  | 118648261 | A | G | 0.014 | 0.002 | -0.011  | 0.0136 | 0.0062    | 0.0175 | -0.0252  | 0.0174 |
| rs1047891   | 2  | 211540507 | C | A | 0.014 | 0.002 | 0.0349  | 0.0137 | 0.0629    | 0.0178 | 0.0135   | 0.0175 |
| rs2011425   | 2  | 234627608 | T | G | 0.046 | 0.004 | -0.0227 | 0.0228 | -0.0522   | 0.0289 | -0.0142  | 0.0291 |
| rs1551042   | 3  | 85630551  | A | C | 0.018 | 0.002 | -0.0352 | 0.013  | -0.0315   | 0.0167 | -0.0399  | 0.0165 |
| rs9859616   | 3  | 125149488 | A | G | 0.014 | 0.002 | -0.0207 | 0.0147 | -0.0086   | 0.019  | -0.034   | 0.0187 |
| rs6773343   | 3  | 141825598 | T | C | 0.013 | 0.002 | -0.0091 | 0.0138 | 0.0091    | 0.0179 | -0.0278  | 0.0176 |
| rs73080940  | 4  | 3482296   | T | C | 0.018 | 0.003 | 0.0207  | 0.0207 | 0.017     | 0.0268 | 0.0264   | 0.0262 |
| rs11723621  | 4  | 72615362  | A | G | 0.187 | 0.002 | -0.0164 | 0.0136 | -0.0062   | 0.0176 | -0.0261  | 0.0174 |
| rs58073039  | 4  | 88287363  | A | G | 0.014 | 0.002 | 0.0257  | 0.0136 | 0.0326    | 0.0175 | 0.0169   | 0.0173 |
| rs28364331  | 4  | 100201295 | G | A | 0.061 | 0.007 | -0.038  | 0.0476 | -0.0429   | 0.0618 | -0.016   | 0.06   |
| rs2112325   | 5  | 118651979 | C | T | 0.013 | 0.002 | -0.0038 | 0.013  | 0.0104    | 0.0168 | -0.0222  | 0.0166 |
| rs28459049  | 7  | 21567331  | C | T | 0.015 | 0.002 | 0.0087  | 0.0154 | -0.0173   | 0.0197 | 0.0301   | 0.0196 |
| rs1011468   | 7  | 104613791 | G | A | 0.014 | 0.002 | -0.0069 | 0.0125 | -0.0099   | 0.0161 | -0.0134  | 0.0159 |
| rs1858889   | 7  | 107117447 | C | A | 0.013 | 0.002 | -0.0058 | 0.0124 | -0.0128   | 0.016  | -0.0043  | 0.0157 |
| rs804280    | 8  | 11612698  | A | C | 0.013 | 0.002 | 0.0071  | 0.0124 | 0.0278    | 0.0161 | -0.0105  | 0.0159 |
| rs34726834  | 8  | 25889606  | T | C | 0.014 | 0.002 | -0.0302 | 0.0142 | -0.0154   | 0.0183 | -0.0415  | 0.0181 |
| rs7828742   | 8  | 116960729 | A | G | 0.022 | 0.002 | 0.0236  | 0.0127 | 0.012     | 0.0164 | 0.0322   | 0.0161 |
| rs10818771  | 9  | 125724054 | A | G | 0.017 | 0.003 | -0.0026 | 0.018  | 0.0117    | 0.023  | -0.0253  | 0.0229 |
| rs532436    | 9  | 136149830 | G | A | 0.015 | 0.003 | -0.0197 | 0.0158 | -0.0263   | 0.0204 | -0.0101  | 0.0201 |
| rs10887718  | 10 | 82042624  | C | T | 0.012 | 0.002 | -0.0286 | 0.0124 | -0.0484   | 0.016  | -0.0119  | 0.0158 |
| rs117913124 | 11 | 14900931  | G | A | 0.354 | 0.006 | -0.026  | 0.0423 | 0.0277    | 0.055  | -0.0661  | 0.0532 |
| rs523583    | 11 | 66070146  | C | A | 0.012 | 0.002 | 0.0101  | 0.0126 | -0.0036   | 0.0161 | 0.0267   | 0.0161 |
| rs12803256  | 11 | 71132868  | G | A | 0.1   | 0.002 | 0.0061  | 0.0144 | -0.0126   | 0.0185 | 0.0267   | 0.0182 |
| rs1149605   | 11 | 76485216  | C | T | 0.019 | 0.003 | 0.0064  | 0.0168 | 0.0391    | 0.0216 | -0.0134  | 0.0215 |
| rs2847500   | 11 | 120114421 | G | A | 0.021 | 0.003 | 0.0391  | 0.0201 | 0.0078    | 0.0253 | 0.0586   | 0.0259 |
| rs12317268  | 12 | 21352541  | A | G | 0.019 | 0.003 | 0.0306  | 0.017  | 0.0084    | 0.0218 | 0.035    | 0.0217 |
| rs9668081   | 12 | 38602911  | T | C | 0.012 | 0.002 | 0.0106  | 0.0123 | 0.0136    | 0.0159 | 0.0131   | 0.0157 |
| rs10859995  | 12 | 96375682  | T | C | 0.039 | 0.002 | -0.0089 | 0.0125 | -0.0195   | 0.0162 | -0.0051  | 0.016  |
| rs2144530   | 14 | 39552484  | C | T | 0.032 | 0.003 | -0.0221 | 0.0164 | -0.028    | 0.0211 | -0.0207  | 0.0208 |
| rs1800588   | 15 | 58723675  | C | T | 0.03  | 0.002 | 0.0251  | 0.0154 | 0.0362    | 0.0198 | 0.0122   | 0.0195 |
| rs17765311  | 15 | 63789952  | A | C | 0.015 | 0.002 | -0.0278 | 0.013  | -0.0299   | 0.0169 | -0.0218  | 0.0166 |
| rs62007299  | 15 | 77711719  | G | A | 0.014 | 0.002 | 0.0352  | 0.0135 | 0.0447    | 0.0174 | 0.0371   | 0.0173 |
| rs7205121   | 16 | 11908776  | C | T | 0.013 | 0.002 | -0.0068 | 0.0143 | 0.0172    | 0.0184 | -0.0319  | 0.0182 |
| rs77924615  | 16 | 20392332  | G | A | 0.016 | 0.002 | 0.0192  | 0.0162 | -0.0056   | 0.0209 | 0.0497   | 0.0207 |
| rs1800775   | 16 | 56995236  | C | A | 0.017 | 0.002 | 0.0085  | 0.0125 | 0.0051    | 0.0162 | 0.0083   | 0.016  |
| rs2909218   | 17 | 66464546  | T | C | 0.017 | 0.002 | -0.0025 | 0.0153 | -0.0267   | 0.0198 | 0.021    | 0.0196 |
| rs8091117   | 18 | 28919794  | C | A | 0.024 | 0.004 | -0.0226 | 0.0245 | -0.0555   | 0.0314 | 0.0217   | 0.0313 |
| rs2037511   | 18 | 61366207  | A | G | 0.016 | 0.003 | 0.0206  | 0.0164 | 0.013     | 0.0212 | 0.02     | 0.021  |
| rs57631352  | 19 | 4338173   | A | G | 0.013 | 0.002 | -0.0229 | 0.0137 | -0.0183   | 0.0177 | -0.0272  | 0.0174 |
| rs73015021  | 19 | 11192915  | G | A | 0.023 | 0.003 | -0.0181 | 0.0196 | -0.0212   | 0.0251 | 0.0011   | 0.0252 |
| rs10500209  | 19 | 11979164  | T | C | 0.013 | 0.002 | 0.04    | 0.0139 | 0.0467    | 0.0179 | 0.0357   | 0.0176 |
| rs58542926  | 19 | 19379549  | T | C | 0.032 | 0.004 | 0.0025  | 0.0239 | 0.027     | 0.0308 | -0.0332  | 0.0305 |
| rs3814995   | 19 | 36342212  | C | T | 0.015 | 0.002 | 0.0126  | 0.0162 | 0.0213    | 0.0206 | 0.0051   | 0.0208 |
| rs157595    | 19 | 45425460  | A | G | 0.016 | 0.002 | 0.0311  | 0.0139 | 0.0276    | 0.0177 | 0.0315   | 0.0178 |
| rs10426     | 19 | 51517798  | A | G | 0.025 | 0.002 | 0.0077  | 0.0154 | 0.0085    | 0.0198 | 7.00E-04 | 0.0197 |
| rs8103262   | 19 | 53065814  | C | T | 0.013 | 0.002 | -0.0022 | 0.0137 | -2.00E-04 | 0.0179 | 0.0024   | 0.0173 |
| rs17274750  | 21 | 16353809  | A | C | 0.026 | 0.003 | -0.0706 | 0.0211 | -0.0599   | 0.027  | -0.0573  | 0.0273 |
| rs960596    | 22 | 41393520  | T | C | 0.012 | 0.002 | -0.0312 | 0.0134 | -0.0408   | 0.0173 | -0.0265  | 0.0171 |
| rs1801133   | 1  | 11856378  | G | A | 0.115 | 0.008 | -0.036  | 0.013  | -0.046    | 0.017  | -0.022   | 0.017  |

Vitamin B9 (folate)



|                                               |             |    |           |   |   |       |       |        |       |        |       |        |       |
|-----------------------------------------------|-------------|----|-----------|---|---|-------|-------|--------|-------|--------|-------|--------|-------|
|                                               | rs652197    | 11 | 71849741  | C | T | 0.069 | 0.010 | 0.042  | 0.019 | 0.059  | 0.025 | 0.021  | 0.025 |
| Vitamin B12                                   | rs116075662 | 4  | 146574155 | G | A | 0.099 | 0.015 | 0.053  | 0.028 | 0.048  | 0.036 | 0.039  | 0.036 |
|                                               | rs1141321   | 6  | 49412433  | C | T | 0.070 | 0.007 | -0.008 | 0.013 | -0.026 | 0.017 | 0.012  | 0.016 |
|                                               | rs1801222   | 10 | 17156151  | G | A | 0.119 | 0.007 | -0.012 | 0.013 | -0.014 | 0.017 | -0.006 | 0.017 |
|                                               | rs34324219  | 11 | 59623378  | C | A | 0.236 | 0.010 | 0.007  | 0.021 | 0.039  | 0.028 | -0.022 | 0.027 |
|                                               | rs12272669  | 11 | 71392610  | A | G | 0.510 | 0.086 | -0.001 | 0.034 | -0.046 | 0.045 | 0.064  | 0.043 |
|                                               | rs41281112  | 13 | 100518634 | C | T | 0.181 | 0.015 | -0.076 | 0.048 | -0.047 | 0.061 | -0.114 | 0.061 |
|                                               | rs3742801   | 14 | 74759006  | T | C | 0.053 | 0.007 | -0.002 | 0.013 | -0.017 | 0.017 | 0.017  | 0.016 |
|                                               | rs2336573   | 19 | 8367709   | T | C | 0.313 | 0.019 | -0.002 | 0.033 | -0.032 | 0.043 | 0.021  | 0.043 |
|                                               | rs602662    | 19 | 49206985  | A | G | 0.171 | 0.007 | 0.052  | 0.013 | 0.102  | 0.016 | 0.013  | 0.016 |
|                                               | rs1131603   | 22 | 31018975  | C | T | 0.224 | 0.015 | 0.019  | 0.031 | -0.012 | 0.041 | 0.032  | 0.039 |
| Omega-3 fatty acids                           | rs174546    | 11 | 61569830  | C | T | 0.154 | 0.012 | -0.051 | 0.013 | -0.083 | 0.017 | -0.027 | 0.017 |
|                                               | rs11604424  | 11 | 116651115 | C | T | 0.090 | 0.014 | 0.003  | 0.015 | 0.001  | 0.020 | -0.005 | 0.019 |
|                                               | rs1077835   | 15 | 58723426  | G | A | 0.089 | 0.014 | -0.025 | 0.015 | -0.034 | 0.020 | -0.014 | 0.020 |
|                                               | rs8100204   | 19 | 19393714  | G | A | 0.122 | 0.020 | -0.022 | 0.019 | -0.036 | 0.025 | -0.003 | 0.025 |
| Omega-6 fatty acids                           | rs191448950 | 1  | 55584844  | G | A | 0.294 | 0.036 | 0.029  | 0.083 | 0.006  | 0.106 | 0.018  | 0.108 |
|                                               | rs4344355   | 1  | 63153953  | C | T | 0.093 | 0.014 | -0.026 | 0.013 | -0.065 | 0.017 | 0.009  | 0.017 |
|                                               | rs144064722 | 4  | 73406173  | G | A | 0.237 | 0.040 | -0.036 | 0.042 | -0.034 | 0.054 | -0.043 | 0.054 |
|                                               | rs79225634  | 5  | 74619639  | T | C | 0.085 | 0.013 | -0.023 | 0.013 | -0.030 | 0.017 | -0.018 | 0.017 |
|                                               | rs3741298   | 11 | 116657561 | C | T | 0.143 | 0.015 | -0.001 | 0.016 | -0.007 | 0.020 | -0.004 | 0.020 |
|                                               | rs1800588   | 15 | 58723675  | T | C | 0.143 | 0.014 | -0.025 | 0.015 | -0.036 | 0.020 | -0.012 | 0.020 |
|                                               | rs112898275 | 19 | 11188850  | T | C | 0.161 | 0.021 | 0.014  | 0.020 | 0.019  | 0.025 | -0.007 | 0.025 |
|                                               | rs7412      | 19 | 45412079  | C | T | 0.272 | 0.028 | 0.037  | 0.024 | 0.011  | 0.030 | 0.054  | 0.030 |
| Monounsaturated fatty acids (mainly omega-9 : | rs115849089 | 8  | 19912370  | G | A | 0.121 | 0.020 | 0.016  | 0.020 | 0.022  | 0.025 | 0.015  | 0.025 |
|                                               | rs3741298   | 11 | 116657561 | C | T | 0.121 | 0.014 | -0.001 | 0.016 | -0.007 | 0.020 | -0.004 | 0.020 |
|                                               | rs1800588   | 15 | 58723675  | T | C | 0.130 | 0.014 | -0.025 | 0.015 | -0.036 | 0.020 | -0.012 | 0.020 |
|                                               | rs56255430  | 19 | 19477877  | A | C | 0.147 | 0.025 | -0.013 | 0.023 | -0.031 | 0.029 | 0.011  | 0.029 |
| Total fatty acids                             | rs191448950 | 1  | 55584844  | G | A | 0.229 | 0.036 | 0.029  | 0.083 | 0.006  | 0.106 | 0.018  | 0.108 |
|                                               | rs1168041   | 1  | 62960250  | C | T | 0.085 | 0.014 | -0.029 | 0.013 | -0.067 | 0.017 | 0.007  | 0.017 |
|                                               | rs115849089 | 8  | 19912370  | G | A | 0.118 | 0.020 | 0.016  | 0.020 | 0.022  | 0.025 | 0.015  | 0.025 |
|                                               | rs3741298   | 11 | 116657561 | C | T | 0.136 | 0.014 | -0.001 | 0.016 | -0.007 | 0.020 | -0.004 | 0.020 |
|                                               | rs1800588   | 15 | 58723675  | T | C | 0.153 | 0.014 | -0.025 | 0.015 | -0.036 | 0.020 | -0.012 | 0.020 |
|                                               | rs56289821  | 19 | 11188247  | G | A | 0.122 | 0.021 | 0.016  | 0.020 | 0.021  | 0.026 | -0.006 | 0.025 |
|                                               | rs8100204   | 19 | 19393714  | G | A | 0.123 | 0.020 | -0.022 | 0.019 | -0.036 | 0.025 | -0.003 | 0.025 |
|                                               | rs429358    | 19 | 45411941  | C | T | 0.106 | 0.016 | 0.010  | 0.019 | 0.005  | 0.024 | -0.007 | 0.024 |

Table S2- Results of sensitivity Mendelian randomization methods for observed environmental risk factors on inflammatory bowel diseases (IBD), including Crohn's disease (CD), and ulcerative colitis (UC). OR: Odds ratio. LCI: Lower confidence interval. UCI: Upper confidence interval. P: P value. Phet: P value for SNP heterogeneity

| Phenotype                                 | n SNP | Disease | Likelihood-based method |      |      |         |         | Weighted median |      |      |         | Modal-based method |      |      |      | MR-Egger Simex approach |      |        |      | MR-Egger intercept |          |              |              | MR-PRESSO |         |      |                                                                                                                                                                                                                     |  |
|-------------------------------------------|-------|---------|-------------------------|------|------|---------|---------|-----------------|------|------|---------|--------------------|------|------|------|-------------------------|------|--------|------|--------------------|----------|--------------|--------------|-----------|---------|------|---------------------------------------------------------------------------------------------------------------------------------------------------------------------------------------------------------------------|--|
|                                           |       |         | OR                      | LCI  | UCI  | P       | Phet    | OR              | LCI  | UCI  | P       | OR                 | LCI  | UCI  | P    | I2GX                    | Est  | LCI    | UCI  | P                  | P Global | P Distortion | Outlier SNPs |           |         |      |                                                                                                                                                                                                                     |  |
| <b>Lifestyle</b>                          |       |         |                         |      |      |         |         |                 |      |      |         |                    |      |      |      |                         |      |        |      |                    |          |              |              |           |         |      |                                                                                                                                                                                                                     |  |
| Smoking status (ever vs never)            | 331   | IBD     | 1.05                    | 0.97 | 1.14 | 0.24    | 6.3E-34 | 1.04            | 0.91 | 1.18 | 0.62    | 0.95               | 0.68 | 1.32 | 0.76 | 0.76                    | 0.39 | 1.46   | 0.40 | 0.40               | 0.005    | -0.002       | 0.011        | 0.15      | <1E-04  | 0.61 | r12526390,r13172494,r13764351,r13810496,r141264285,r161886926,r167696533,r177215829                                                                                                                                 |  |
|                                           |       | CD      | 1.13                    | 1.02 | 1.25 | 0.02    | 1.8E-24 | 1.07            | 0.91 | 1.27 | 0.41    | 1.00               | 0.62 | 1.61 | 1.00 | 0.73                    | 0.33 | 1.62   | 0.43 | 0.40               | 0.007    | -0.001       | 0.015        | 0.10      | <1E-04  | 0.97 | r13172494,r1359431,r13764351,r14264285,r161886926,r18103660                                                                                                                                                         |  |
|                                           |       | UC      | 0.99                    | 0.90 | 1.10 | 0.88    | 3.9E-15 | 1.09            | 0.93 | 1.28 | 0.30    | 1.22               | 0.75 | 1.98 | 0.43 | 0.75                    | 0.36 | 1.56   | 0.44 | 0.40               | 0.004    | -0.004       | 0.012        | 0.34      | <1E-04  | 1.00 | r17229285,r12526390                                                                                                                                                                                                 |  |
| Cigarettes per day                        | 44    | IBD     | 1.04                    | 0.88 | 1.22 | 0.67    | 3.1E-07 | 1.01            | 0.78 | 1.31 | 0.94    | 1.03               | 0.82 | 1.29 | 0.80 | 0.83                    | 0.52 | 1.33   | 0.43 | 0.96               | 0.007    | -0.001       | 0.014        | 0.07      | 1.0E-04 | 0.19 | r13253502,r1293534                                                                                                                                                                                                  |  |
|                                           |       | CD      | 1.17                    | 0.94 | 1.44 | 0.16    | 1.8E-06 | 1.04            | 0.76 | 1.42 | 0.82    | 1.03               | 0.77 | 1.38 | 0.85 | 0.73                    | 0.41 | 1.28   | 0.26 | 0.96               | 0.015    | 0.005        | 0.024        | 4.2E-03   | <1E-04  | 0.67 | r13253502                                                                                                                                                                                                           |  |
|                                           |       | UC      | 0.90                    | 0.73 | 1.10 | 0.30    | 0.01    | 0.91            | 0.66 | 1.24 | 0.55    | 0.93               | 0.70 | 1.23 | 0.61 | 0.85                    | 0.52 | 1.39   | 0.51 | 0.96               | 0.001    | -0.008       | 0.011        | 0.76      | 8.7E-03 | -    | -                                                                                                                                                                                                                   |  |
| Body-mass index                           | 816   | IBD     | 0.97                    | 0.91 | 1.04 | 0.38    | 1.5E-96 | 1.07            | 0.95 | 1.20 | 0.26    | 1.19               | 0.91 | 1.54 | 0.20 | 1.17                    | 0.84 | 1.62   | 0.36 | 0.85               | -0.003   | -0.005       | 0.000        | 0.07      | <1E-04  | 0.97 | r10182181,r110492861,r11065987,r11066188,r111710798,r111713193,r112044597,r113107325,r13800668,r12010281,r12023671,r12726039,r12836754,r14722672,r14985155,r1739742,r17498665,r17560871,r18070454                   |  |
|                                           |       | CD      | 1.11                    | 1.02 | 1.20 | 0.02    | 2.4E-71 | 1.26            | 1.09 | 1.45 | 1.6E-03 | 1.49               | 1.09 | 2.03 | 0.01 | 1.38                    | 0.93 | 2.07   | 0.11 | 0.85               | -0.003   | -0.007       | 0.001        | 0.10      | <1E-04  | 0.82 | r10182181,r110492861,r11065987,r11066188,r111710798,r111713193,r112888545,r113107325,r13363695,r117391694,r1800668,r12010281,r12726039,r1350832,r1657452,r1739742,r17498665,r17560871,r18070454,r18492155,r19021595 |  |
|                                           |       | UC      | 0.85                    | 0.78 | 0.92 | 5.2E-05 | 1.5E-46 | 0.88            | 0.76 | 1.02 | 0.10    | 0.92               | 0.65 | 1.29 | 0.61 | 1.00                    | 0.69 | 1.44   | 0.98 | 0.84               | -0.003   | -0.006       | 0.001        | 0.14      | <1E-04  | 0.47 | r11065987,r11066188,r111713193,r112044597,r1300668,r14722672,r14985155,r17498665,r17535528,r18070454                                                                                                                |  |
| Waist-to-hip ratio                        | 403   | IBD     | 1.05                    | 0.96 | 1.14 | 0.33    | 3.8E-59 | 0.92            | 0.79 | 1.08 | 0.31    | 0.86               | 0.63 | 1.18 | 0.34 | 0.83                    | 0.52 | 1.33   | 0.45 | 0.83               | 0.003    | -0.001       | 0.007        | 0.09      | <1E-04  | 0.19 | r10019888,r1017698,r13316065,r12008514,r128445639,r1591939,r17531656,r17591387                                                                                                                                      |  |
|                                           |       | CD      | 1.22                    | 1.09 | 1.37 | 6.0E-04 | 2.0E-47 | 1.10            | 0.90 | 1.35 | 0.35    | 1.02               | 0.70 | 1.48 | 0.92 | 1.03                    | 0.58 | 1.82   | 0.92 | 0.83               | 0.003    | -0.002       | 0.008        | 0.24      | <1E-04  | 0.10 | r10019888,r13316065,r1708302,r1793892,r12008514,r128445639,r13094621,r1591939,r17196397,r17591387                                                                                                                   |  |
|                                           |       | UC      | 0.90                    | 0.81 | 1.01 | 0.07    | 1.3E-26 | 0.87            | 0.72 | 1.04 | 0.13    | 0.78               | 0.50 | 1.23 | 0.29 | 0.72                    | 0.43 | 1.20   | 0.20 | 0.83               | 0.003    | -0.002       | 0.008        | 0.26      | <1E-04  | 0.84 | r1017698,r11051005,r12008514,r1267846,r1713770                                                                                                                                                                      |  |
| Body fat percentage                       | 379   | IBD     | 1.26                    | 1.14 | 1.39 | 3.8E-06 | 6.5E-71 | 1.26            | 1.06 | 1.50 | 0.01    | 1.49               | 1.01 | 2.20 | 0.04 | 1.84                    | 0.99 | 3.41   | 0.05 | 0.74               | -0.004   | -0.009       | 0.000        | 0.07      | <1E-04  | 0.16 | r1056441,r1167309,r113107325,r156186137,r162259939,r16752378,r16955671,r173079014,r17628677                                                                                                                         |  |
|                                           |       | CD      | 1.50                    | 1.32 | 1.71 | 3.0E-10 | 9.3E-58 | 1.49            | 1.21 | 1.83 | 1.9E-04 | 2.01               | 1.14 | 3.55 | 0.02 | 2.83                    | 1.31 | 6.14   | 0.01 | 0.73               | -0.007   | -0.014       | -0.001       | 0.02      | <1E-04  | 0.08 | r1056441,r113126505,r12012817,r134517439,r156186137,r162259939,r173079014                                                                                                                                           |  |
|                                           |       | UC      | 1.11                    | 0.98 | 1.25 | 0.11    | 4.2E-32 | 1.17            | 0.94 | 1.45 | 0.15    | 1.22               | 0.75 | 1.99 | 0.41 | 1.36                    | 0.69 | 2.68   | 0.37 | 0.73               | -0.003   | -0.009       | 0.003        | 0.36      | <1E-04  | 0.82 | r10259620,r1056441,r128538451,r156186137,r162259939,r173079014                                                                                                                                                      |  |
| Overall physical activity                 | 2     | IBD     | 0.51                    | 0.27 | 0.98 | 0.04    | 0.05    | 0.53            | 0.27 | 1.05 | 0.07    | 0.54               | 0.29 | 1.02 | 0.31 |                         |      |        |      |                    |          |              |              |           |         |      |                                                                                                                                                                                                                     |  |
|                                           |       | CD      | 0.67                    | 0.28 | 1.56 | 0.35    | 1.5E-03 | 0.70            | 0.29 | 1.72 | 0.44    | 0.57               | 0.25 | 1.32 | 0.42 |                         |      |        |      |                    |          |              |              |           |         |      |                                                                                                                                                                                                                     |  |
|                                           |       | UC      | 0.45                    | 0.20 | 1.00 | 0.05    | 0.40    | 0.45            | 0.20 | 1.05 | 0.07    | 0.43               | 0.19 | 0.97 | 0.29 |                         |      |        |      |                    |          |              |              |           |         |      |                                                                                                                                                                                                                     |  |
| <b>Nutrients</b>                          |       |         |                         |      |      |         |         |                 |      |      |         |                    |      |      |      |                         |      |        |      |                    |          |              |              |           |         |      |                                                                                                                                                                                                                     |  |
| Vitamin D                                 | 59    | IBD     | 0.96                    | 0.87 | 1.06 | 0.38    | 4.1E-16 | 0.92            | 0.81 | 1.05 | 0.22    | 0.93               | 0.83 | 1.04 | 0.21 | 0.93                    | 0.74 | 1.17   | 0.51 | 0.99               | 0.002    | -0.003       | 0.007        | 0.41      | <1E-04  | 0.77 | r10796941,r111127048,r13768013                                                                                                                                                                                      |  |
|                                           |       | CD      | 0.96                    | 0.85 | 1.09 | 0.56    | 4.0E-14 | 0.97            | 0.82 | 1.15 | 0.72    | 0.98               | 0.85 | 1.14 | 0.83 | 0.97                    | 0.73 | 1.29   | 0.82 | 0.99               | -3.E-04  | -0.006       | 0.006        | 0.92      | <1E-04  | 0.93 | r10796941,r111127048                                                                                                                                                                                                |  |
|                                           |       | UC      | 0.95                    | 0.83 | 1.07 | 0.39    | 6.2E-07 | 0.87            | 0.74 | 1.02 | 0.09    | 0.91               | 0.79 | 1.05 | 0.19 | 0.91                    | 0.71 | 1.15   | 0.40 | 0.99               | 0.003    | -0.003       | 0.009        | 0.34      | <1E-04  | 0.87 | r13768013                                                                                                                                                                                                           |  |
| Vitamin B9 (folate)                       | 2     | IBD     | 0.83                    | 0.67 | 1.03 | 0.09    | 2.5E-03 | 0.84            | 0.67 | 1.04 | 0.10    | 0.75               | 0.60 | 0.94 | 0.24 |                         |      |        |      |                    |          |              |              |           |         |      |                                                                                                                                                                                                                     |  |
|                                           |       | CD      | 0.80                    | 0.61 | 1.04 | 0.10    | 1.1E-03 | 0.80            | 0.61 | 1.06 | 0.12    | 0.70               | 0.52 | 0.92 | 0.24 |                         |      |        |      |                    |          |              |              |           |         |      |                                                                                                                                                                                                                     |  |
|                                           |       | UC      | 0.89                    | 0.68 | 1.16 | 0.37    | 0.20    | 0.89            | 0.67 | 1.17 | 0.40    | 0.84               | 0.63 | 1.11 | 0.43 |                         |      |        |      |                    |          |              |              |           |         |      |                                                                                                                                                                                                                     |  |
| Vitamin B12                               | 10    | IBD     | 1.07                    | 1.00 | 1.15 | 0.06    | 0.01    | 1.01            | 0.92 | 1.12 | 0.83    | 1.00               | 0.89 | 1.12 | 0.97 | 1.06                    | 0.83 | 1.35   | 0.59 | 0.98               | 0.001    | -0.023       | 0.024        | 0.94      | 0.01    | -    | -                                                                                                                                                                                                                   |  |
|                                           |       | CD      | 1.10                    | 1.00 | 1.21 | 0.04    | 8.5E-07 | 0.93            | 0.81 | 1.07 | 0.32    | 0.92               | 0.79 | 1.07 | 0.33 | 1.12                    | 0.71 | 1.76   | 0.59 | 0.98               | -0.003   | -0.034       | 0.027        | 0.80      | <1E-04  | 0.02 | r1602662                                                                                                                                                                                                            |  |
|                                           |       | UC      | 1.06                    | 0.97 | 1.15 | 0.21    | 0.41    | 1.08            | 0.97 | 1.21 | 0.15    | 1.09               | 0.96 | 1.24 | 0.21 | 1.04                    | 0.85 | 1.26   | 0.69 | 0.98               | 0.005    | -0.025       | 0.035        | 0.72      | 0.45    | -    | -                                                                                                                                                                                                                   |  |
| Omega-3 fatty acids                       | 4     | IBD     | 0.78                    | 0.68 | 0.88 | 1.3E-04 | 0.29    | 0.74            | 0.64 | 0.86 | 6.7E-05 | 0.73               | 0.62 | 0.86 | 0.03 | 0.53                    | 0.14 | 1.95   | 0.17 | 0.89               | 0.044    | -0.091       | 0.180        | 0.30      | 0.22    | -    | -                                                                                                                                                                                                                   |  |
|                                           |       | CD      | 0.67                    | 0.56 | 0.79 | 2.3E-06 | 0.18    | 0.64            | 0.53 | 0.79 | 3.1E-05 | 0.61               | 0.49 | 0.75 | 0.02 | 0.36                    | 0.04 | 2.84   | 0.17 | 0.89               | 0.075    | -0.100       | 0.250        | 0.21      | 0.10    | -    | -                                                                                                                                                                                                                   |  |
|                                           |       | UC      | 0.88                    | 0.75 | 1.03 | 0.11    | 0.90    | 0.85            | 0.71 | 1.01 | 0.07    | 0.84               | 0.69 | 1.04 | 0.20 | 0.77                    | 0.41 | 1.45   | 0.22 | 0.89               | 0.016    | -0.157       | 0.188        | 0.74      | 0.86    | -    | -                                                                                                                                                                                                                   |  |
| Omega-6 fatty acids                       | 8     | IBD     | 0.96                    | 0.88 | 1.05 | 0.36    | 0.08    | 1.00            | 0.87 | 1.15 | 0.97    | 1.09               | 0.89 | 1.32 | 0.43 | 1.35                    | 1.05 | 1.73   | 0.03 | 0.92               | -0.049   | -0.091       | -0.008       | 0.03      | 0.05    | -    | -                                                                                                                                                                                                                   |  |
|                                           |       | CD      | 0.87                    | 0.78 | 0.98 | 0.02    | 0.02    | 0.95            | 0.81 | 1.12 | 0.58    | 1.01               | 0.84 | 1.21 | 0.95 | 1.43                    | 0.93 | 2.18   | 0.09 | 0.91               | -0.071   | -0.124       | -0.018       | 0.02      | 0.01    | -    | -                                                                                                                                                                                                                   |  |
|                                           |       | UC      | 1.01                    | 0.90 | 1.13 | 0.88    | 0.57    | 0.97            | 0.84 | 1.13 | 0.71    | 0.95               | 0.75 | 1.20 | 0.68 | 1.22                    | 0.88 | 1.71   | 0.19 | 0.92               | -0.027   | -0.080       | 0.026        | 0.26      | 0.46    | -    | -                                                                                                                                                                                                                   |  |
| Monounsaturated fatty acids (mainly omegi | 4     | IBD     | 0.94                    | 0.82 | 1.08 | 0.38    | 0.42    | 0.94            | 0.80 | 1.10 | 0.44    | 0.92               | 0.73 | 1.17 | 0.55 | 0.15                    | 0.00 | 155.98 | 0.36 | 0.12               | 0.107    | -0.428       | 0.642        | 0.48      | 0.40    | -    | -                                                                                                                                                                                                                   |  |
|                                           |       | CD      | 0.89                    | 0.74 | 1.06 | 0.18    | 0.31    | 0.85            | 0.69 | 1.04 | 0.11    | 0.81               | 0.60 | 1.08 | 0.25 | 0.04                    | 0.00 | 812.05 | 0.29 | 0.12               | 0.185    | -0.505       | 0.874        | 0.37      | 0.32    | -    | -                                                                                                                                                                                                                   |  |
|                                           |       | UC      | 1.00                    | 0.84 | 1.18 | 0.97    | 0.82    | 0.98            | 0.80 | 1.20 | 0.85    | 0.95               | 0.74 | 1.22 | 0.71 | 1.35                    | 0.00 | 527.99 | 0.85 | 0.19               | -0.020   | -0.702       | 0.663        | 0.91      | 0.82    | -    | -                                                                                                                                                                                                                   |  |
| Total fatty acids                         | 8     | IBD     | 0.94                    | 0.85 | 1.04 | 0.21    | 0.27    | 0.94            | 0.82 | 1.07 | 0.34    | 0.85               | 0.70 | 1.04 | 0.16 | 1.19                    | 0.46 | 3.11   | 0.67 | 0.91               | -0.024   | -0.102       | 0.053        | 0.48      | 0.27    | -    | -                                                                                                                                                                                                                   |  |
|                                           |       | CD      | 0.85                    | 0.75 | 0.98 | 0.02    | 0.02    | 0.89            | 0.74 | 1.06 | 0.18    | 0.89               | 0.71 | 1.13 | 0.37 | 1.88                    | 0.40 | 8.77   | 0.36 | 0.91               | -0.077   | -0.176       | 0.023        | 0.11      | 0.02    | -    | -                                                                                                                                                                                                                   |  |
|                                           |       | UC      | 0.98                    | 0.86 | 1.12 | 0.79    | 0.99    | 0.97            | 0.83 | 1.14 | 0.72    | 0.95               | 0.78 | 1.16 | 0.63 | 0.77                    | 0.54 | 1.09   | 0.11 | 0.91               | 0.023    | -0.077       | 0.122        | 0.60      | 0.99    | -    | -                                                                                                                                                                                                                   |  |
